# Supplementary material for: Experiences of people taking opioid medication for chronic non-malignant pain: a qualitative evidence synthesis using meta-ethnography
Source: PubMed Central journal article supplement (PMC7044883; doi:10.1136/bmjopen-2019-032988), 2020-02-18
Supplement: bmjopen-2019-032988.draft_revisions.pdf [file bmjopen-2019-032988.draft_revisions.pdf]

# BMJ Open

BMJ Open is committed to open peer review. As part of this commitment we make the peer review history of every article we publish publicly available.

When an article is published we post the peer reviewers' comments and the authors' responses online. We also post the versions of the paper that were used during peer review. These are the versions that the peer review comments apply to.

The versions of the paper that follow are the versions that were submitted during the peer review process. They are not the versions of record or the final published versions. They should not be cited or distributed as the published version of this manuscript.

BMJ Open is an open access journal and the full, final, typeset and author-corrected version of record of the manuscript is available on our site with no access controls, subscription charges or pay-per-view fees (<http://bmjopen.bmj.com>).

If you have any questions on BMJ Open's open peer review process please email [info.bmjopen@bmj.com](mailto:info.bmjopen@bmj.com)

# BMJ Open

## A systematic review and qualitative evidence synthesis of the experiences of people taking opioid medication for chronic non-malignant pain: a meta-ethnography

|                               |                                                                                                                                                                                                                                                                                                                                                                                                                                                                                                                                                                                                                                                  |
|-------------------------------|--------------------------------------------------------------------------------------------------------------------------------------------------------------------------------------------------------------------------------------------------------------------------------------------------------------------------------------------------------------------------------------------------------------------------------------------------------------------------------------------------------------------------------------------------------------------------------------------------------------------------------------------------|
| Journal:                      | <i>BMJ Open</i>                                                                                                                                                                                                                                                                                                                                                                                                                                                                                                                                                                                                                                  |
| Manuscript ID                 | bmjopen-2019-032988                                                                                                                                                                                                                                                                                                                                                                                                                                                                                                                                                                                                                              |
| Article Type:                 | Research                                                                                                                                                                                                                                                                                                                                                                                                                                                                                                                                                                                                                                         |
| Date Submitted by the Author: | 15-Jul-2019                                                                                                                                                                                                                                                                                                                                                                                                                                                                                                                                                                                                                                      |
| Complete List of Authors:     | Nichols, Vivien; University of Warwick, Warwick Clinical Trials Unit, Warwick Medical School<br>Toye, Francine; Oxford University Hospitals NHS Trust, Nuffield Orthopaedic Centre Physiotherapy Research Unit<br>Eldabe, Sam; The James Cook University Hospital<br>Sandhu, Harbinder; University of Warwick, Warwick Clinical Trials Unit, Warwick Medical School<br>Underwood, Martin; University of Warwick, Warwick Clinical Trials Unit, Warwick Medical School; University Hospitals of Coventry and Warwickshire<br>Seers, Kate; University of Warwick, Warwick Research in Nursing, Division of Health Sciences, Warwick Medical School |
| Keywords:                     | opioid, patients' views, QUALITATIVE RESEARCH, chronic non-malignant pain, meta-ethnography, qualitative evidence synthesis                                                                                                                                                                                                                                                                                                                                                                                                                                                                                                                      |
|                               |                                                                                                                                                                                                                                                                                                                                                                                                                                                                                                                                                                                                                                                  |

SCHOLARONE™  
Manuscripts

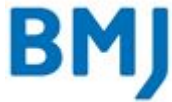

I, the Submitting Author has the right to grant and does grant on behalf of all authors of the Work (as defined in the below author licence), an exclusive licence and/or a non-exclusive licence for contributions from authors who are: i) UK Crown employees; ii) where BMJ has agreed a CC-BY licence shall apply, and/or iii) in accordance with the terms applicable for US Federal Government officers or employees acting as part of their official duties; on a worldwide, perpetual, irrevocable, royalty-free basis to BMJ Publishing Group Ltd ("BMJ") its licensees and where the relevant Journal is co-owned by BMJ to the co-owners of the Journal, to publish the Work in this journal and any other BMJ products and to exploit all rights, as set out in our [licence](#).

The Submitting Author accepts and understands that any supply made under these terms is made by BMJ to the Submitting Author unless you are acting as an employee on behalf of your employer or a postgraduate student of an affiliated institution which is paying any applicable article publishing charge ("APC") for Open Access articles. Where the Submitting Author wishes to make the Work available on an Open Access basis (and intends to pay the relevant APC), the terms of reuse of such Open Access shall be governed by a Creative Commons licence – details of these licences and which [Creative Commons](#) licence will apply to this Work are set out in our licence referred to above.

Other than as permitted in any relevant BMJ Author's Self Archiving Policies, I confirm this Work has not been accepted for publication elsewhere, is not being considered for publication elsewhere and does not duplicate material already published. I confirm all authors consent to publication of this Work and authorise the granting of this licence.

1  
2  
3  
4  
5  
6  
7  
8  
9  
10  
11  
12  
13  
14  
15  
16  
17  
18  
19  
20  
21  
22  
23  
24  
25  
26  
27  
28  
29  
30  
31  
32  
33  
34  
35  
36  
37  
38  
39  
40  
41  
42  
43  
44  
45  
46  
47  
48  
49  
50  
51  
52  
53  
54  
55  
56  
57  
58  
59  
60

# A systematic review and qualitative evidence synthesis of the experiences of people taking opioid medication for chronic non-malignant pain: a meta-ethnography

Mrs Vivien Nichols (1) Dr Francine Toyne (2) Professor Sam Eldabe (3) Dr Harbinder Sandhu (1) Professor Martin Underwood (1,4) and Professor Kate Seers (5)

(1) Warwick Clinical Trials Unit  
Warwick Medical School  
University of Warwick, UK

(2) Physiotherapy Research Unit, Nuffield Orthopaedic Centre,  
Oxford University Hospitals NHS Foundation Trust  
Oxford, UK

(3) Academic Pain Department  
The James Cook University Hospital  
Middlesbrough, UK

(4) University Hospitals of Coventry and Warwickshire  
Coventry, UK

(5) Warwick Research in Nursing  
Warwick Medical School  
University of Warwick, UK

Corresponding author:

Mrs Vivien Nichols  
Warwick Clinical Trials Unit,  
Division of Health Sciences,  
Warwick Medical School,  
University of Warwick  
Coventry CV4 7AL  
Tel: 02476574652  
Email: [V.P.Nichols@warwick.ac.uk](mailto:V.P.Nichols@warwick.ac.uk)

## Abstract

*Objective* To review qualitative studies of the experience of taking opioid medication for Chronic Non-Malignant Pain (CNMP)

*Design* A qualitative evidence synthesis using meta-ethnography.

*Methods* We used a seven step approach from the methods of meta-ethnography. We searched selected databases for qualitative studies which gave patients' views of taking opioid medication for CNMP. Papers were quality appraised using a CASP tool and GRADE-CERQual guidelines were applied. We identified concepts and iteratively abstracted these concepts into a line of argument.

*Results* We screened 2129 unique citations, checked 153 full texts and 31 met our review criteria. We identified five themes: 1) Reluctant users with little choice; 2) Understanding opioids: the good and the bad; 3) A therapeutic alliance: not always on the same page; 4) Stigma: feeling scared and secretive but needing support; and 5) The challenge of tapering or withdrawal. A new overarching theme of 'constantly balancing' emerged from the data.

*Conclusions* People taking opioids are constantly balancing tensions, not always wanting to take opioids, but feeling they have no choice because of the pain. They frequently feel judged, were not always 'on the same page' as their health care professional and changes in opioid use were often challenging.

**Key words:** Opioid, patients' views, qualitative research, chronic non-malignant pain, meta-ethnography, qualitative evidence synthesis.

Word count 4,863

## Strengths and Limitations

- To our knowledge this is the first qualitative evidence synthesis of patients' experiences of taking opioid medications.
- Meta-ethnography provides a thorough, systematic way of synthesising qualitative findings across multiple studies and gives the reviewer's interpretation of the data.
- Using a GRADE-CERQual approach can assist in rating confidence in the review findings.
- Qualitative research that illuminates patients' perspectives can help to shape future approaches to opioid management.

## Introduction

Chronic non-malignant pain (CNMP) affects an estimated 11 to 20% of the population in Europe and US respectively and can impact heavily on people's quality of life <sup>1,2</sup>. Opioid medications are strong painkillers which have a well-established role in the treatment of acute and cancer pain; they have also been advocated for CNMP. Opioids can have distressing side effects as dosages increase such as; constipation, sedation, drowsiness, nausea, decreased concentration and memory, or mood changes <sup>3</sup>. Most people who use opioids develop tolerance to the painkilling effect of opioids, and some become dependent on them. Studies have shown that high opioid usage can also put people's lives at risk <sup>4</sup>. Despite this, the prescription of opioid medication for CNMP has risen sharply in the higher income countries. Few studies of opioids have shown effectiveness beyond 12 weeks follow up. Population

1  
2  
3 surveys have shown long-term use to be associated with increased side effects and  
4  
5 limited pain relief<sup>3 5 6</sup>.

7  
8 This synthesis of qualitative research was undertaken to underpin a process evaluation  
9  
10 for the Improving the Wellbeing of people with Opioid Treated Chronic pain (I-  
11  
12 WOTCH) study funded by the National Institute for Health Research. I-WOTCH is a  
13  
14 randomised controlled trial evaluating a multi-component education and patient  
15  
16 centred group intervention with tapering programme against a control of an advice  
17  
18 booklet with a relaxation CD. More information can be found in the main study  
19  
20 protocol (in press) and process evaluation protocol (under review) (references to be  
21  
22 added).  
23  
24

25  
26 This qualitative evidence synthesis uses the methods of meta-ethnography to find out  
27  
28 what peoples' experiences are of both using opioids for CNMP and their attempts to  
29  
30 stop taking them.  
31  
32

## 33 34 **Methods**

35  
36  
37 We use Noblit and Hare's 7 stages of meta-ethnographic analysis<sup>7</sup>. We used the new  
38  
39 eMERGe reporting guidelines for meta-ethnography to structure our report<sup>8</sup> (*See*  
40  
41 *appendix 1*). The protocol is published in the international prospective register of  
42  
43 systematic reviews (PROSPERO) registration number: CRD42017082418.  
44  
45

46  
47 <http://www.crd.york.ac.uk/PROSPERO>

### 48 49 *Step 1 Getting Started.*

50  
51 In order to address what has been labelled an opioid epidemic<sup>9</sup>, we need to  
52  
53 understand peoples' experiences of being on opioids and of coming off them. Our  
54  
55 team was chosen because of its expertise in primary qualitative research and  
56  
57 qualitative evidence synthesis specific to chronic pain and opioid prescription.  
58  
59  
60

1  
2  
3 *Step 2 Deciding what is relevant.*  
4

5 We undertook systematic electronic searches in June 2017 with a rerun in September  
6  
7 2018, appraising relevant papers for quality using the Critical Appraisal Skills  
8 Programme (CASP) tool for qualitative research <sup>10</sup>. One researcher (VN) with the  
9 assistance of an academic librarian (SJ) searched 7 electronic databases; Medline,  
10 Embase, AMED, CINAHL, PsycInfo Web of Science and Scopus (Science citation  
11 index and Social Science Citation Index) and forward citation searches. We used  
12 search terms, free text and MeSH terms for all opioid drugs as well as their generic  
13 names. We combined these with the MeSH term 'pain' and a wide range of MeSH  
14 terms and words to describe all types of qualitative research and its analysis based  
15 upon a search used by Toye, Seers and Barker in 2017 <sup>11</sup>. The search was limited to  
16 those in English regarding humans with no cut-off date. Appendix 2 shows an  
17 example of our search terms.  
18  
19  
20  
21  
22  
23  
24  
25  
26  
27  
28  
29  
30  
31  
32

33 Unique citations were screened independently by 2 researchers (VN ST *see*  
34 *acknowledgements*) against our inclusion and exclusion criteria (see Box 1). Any  
35 disagreements were arbitrated by a third researcher (KS). Papers for full text reading  
36 were identified and read by two researchers. Quality was assessed using a CASP tool.  
37 VN critically appraised the studies and KS independently appraised 10% for  
38 consistency. The CASP scores are shown in table 1 and appendix 3. The GRADE-  
39 CERQual (Confidence in Evidence from Reviews of Qualitative research) was used to  
40 appraise the reviewers' confidence in the research findings <sup>12, 13</sup>.  
41  
42  
43  
44  
45  
46  
47  
48  
49  
50

51 *Box 1 Inclusion/Exclusion criteria*  
52  
53

54 **Included Studies**

55 Adults (18 years or older) taking or have taken opioid medication in the last five years  
56 Published in English in peer review journals with no time constraint  
57 Must relate to patient perspectives on using opioid medication for chronic non-malignant pain  
58 Must use qualitative methodology (any analytical approach) or mixed quantitative and qualitative  
59 methodology with qualitative findings reported separately  
60 Where studies include participants with differing medication we will include studies where the



1  
2  
3 experience of those taking opioids is reported separately

4 **Excluded studies**

5 Theoretical or methodological papers

6 Purely quantitative studies or mixed methods studies where the qualitative data are not presented  
7 separately

8 Studies concerning active cancer

9 Studies concerning headache

10 Studies concerning any acute, or acute postoperative, pain

11 Studies concerned only with health care professional or carer perspectives, or studies of mixed  
12 carer/ patient/ professional populations where patient perspectives are not presented separately

13 Non- English language studies

14 Theses or conference abstracts which are not peer reviewed

15  
16  
17 *Step 3 Reading the studies*

18  
19 VN read all the studies and KS and FT read half of these papers each (so all were read  
20 twice) and all extracted the second order concepts independently. A second order  
21 concept is a researcher's interpretation of data in a primary qualitative study<sup>14</sup>. VN,  
22 KS and FT met to discuss and reach agreement, and compiled a spreadsheet of all of  
23 the concepts extracted from the papers

24  
25  
26 *Step 4 Determining how the studies are related?*

27  
28 VN sorted the concepts into categories by looking for any similarities and differences  
29 across all the studies. VN, KS and FT discussed the categorisation of data on multiple  
30 occasions. To enable comparison across studies, VN recorded descriptive data about  
31 each study (see table 1)

1  
2  
3  
4  
5  
6  
7  
8  
9  
10  
11  
12  
13  
14  
15  
16  
17  
18  
19  
20  
21  
22  
23  
24  
25  
26  
27  
28  
29  
30  
31  
32  
33  
34  
35  
36  
37  
38  
39  
40  
41  
42  
43  
44  
45  
46  
47  
48  
49  
50  
51  
52  
53  
54  
55  
56  
57  
58  
59  
60

For peer review only

Table 1 Study characteristics with CASP and GRADE-CERQual relevance ratings

| Studies                                                                                                                                                 | Country | Data collection / participants                                   | Analytical Approach                      | Aims <i>Italics = verbatim quotes</i>                                                                                                                                                                                                                                                        | Comments           | CASP score | Relevance |
|---------------------------------------------------------------------------------------------------------------------------------------------------------|---------|------------------------------------------------------------------|------------------------------------------|----------------------------------------------------------------------------------------------------------------------------------------------------------------------------------------------------------------------------------------------------------------------------------------------|--------------------|------------|-----------|
| <b>1 Arnaert et al 2006</b> <sup>15</sup><br>Response Phases in Methadone Treatment for Chronic Non-malignant Pain                                      | Canada  | Semi-structured interview<br>N=11<br>(4M/7F)                     | Content analysis                         | <i>"...to develop an understanding and to gain knowledge about the beliefs of patients with CNMP who were taking methadone, and to explore what challenges, if any, existed that affected their beliefs when first starting methadone treatment as an activity in their personal lives."</i> | Methadone specific | 17/20      | P         |
| <b>2 Bergman et al 2013</b> <sup>16</sup><br>Contrasting Tensions Between Patients and PCPs in Chronic Pain Management: A Qualitative Study             | USA     | In-depth interviews<br>N=26<br>(24m/2F)                          | Inductive thematic analysis              | <i>"... to develop a better understanding of the respective experiences, perceptions, and challenges both patients with chronic pain and PCPs face communicating with each other about pain management in the primary care setting."</i>                                                     | USA Veteran        | 17/20      | P         |
| <b>3 Blake et al 2007</b> <sup>17</sup><br>Experiences of patients requiring strong opioid drugs for chronic non-cancer pain: a patient initiated study | UK      | One focus group N=4<br>(2M/2F) and interviews<br>N=10<br>(3M/5F) | Interpretative Phenomenological Analysis | <i>"...to determine the attitudes and experiences of patients receiving long-term strong opioid medication for chronic non-cancer pain in primary care."</i>                                                                                                                                 | Key                | 19/20      | R         |
| <b>4 Brooks et al 2015</b> <sup>18</sup><br>Exploring the lived experience of adults using prescription opioids to manage chronic noncancer pain        | Canada  | In-depth interviews<br>N=9 (4M/5F)                               | Interpretative Phenomenological Analysis | <i>"...to explore the lived experience of adults using prescription opioids to manage CNCP, focusing on how opioid medication affected their daily lives."</i>                                                                                                                               | Key                | 17/20      | R         |

|                                                                                                    |                                                                                                                                                                                   |        |                                                                               |                                                       |                                                                                                                                                                                                                                                                                                                                                         |                                                                                                                   |       |   |
|----------------------------------------------------------------------------------------------------|-----------------------------------------------------------------------------------------------------------------------------------------------------------------------------------|--------|-------------------------------------------------------------------------------|-------------------------------------------------------|---------------------------------------------------------------------------------------------------------------------------------------------------------------------------------------------------------------------------------------------------------------------------------------------------------------------------------------------------------|-------------------------------------------------------------------------------------------------------------------|-------|---|
| 1<br>2<br>3<br>4<br>5<br>6<br>7<br>8<br>9<br>10<br>11                                              | <b>5 Buchbinder et al 2014</b> <sup>19</sup> “Is there any way I can get something for my pain?” Patient strategies for requesting analgesics                                     | USA    | Audio recorded clinical encounters<br>N=74<br>(37M/37F)                       | Qualitative approach based on conversational analysis | <i>“We examined the direct and indirect means by which patients express a desire for analgesic medication.”</i>                                                                                                                                                                                                                                         | More for acute back pain in an emergency setting. Not opioid specific although includes information about opioids | 18/20 | I |
| 12<br>13<br>14<br>15<br>16<br>17<br>18<br>19<br>20                                                 | <b>6 Chang Y-P et al 2011</b> <sup>20</sup> Use of Prescription Opioid Medication among Community-Dwelling Older Adults with Noncancer Chronic Pain                               | USA    | Face to face interview<br>N=21<br>(13M/8F)<br>≥65yrs                          | Content analysis, mixed methods                       | <i>“... to: (1) describe older adults’ patterns of adherence to their prescription opioid medication regimens and their reasons for these medication use patterns; and (2) examine the associations between adherence of prescription opioids, pain intensity, and pain interference on daily activity.”</i>                                            | Thematically 'thin'                                                                                               | 16/20 | P |
| 21<br>22<br>23<br>24<br>25<br>26<br>27<br>28<br>29                                                 | <b>7 Chang,F et al 2017</b> <sup>21</sup> Perceptions of Community-Dwelling Patients and Their Physicians on OxyContin® Discontinuation and the Impact on Chronic Pain Management | Canada | Pt interviews<br>N=13<br>1M/ 12F                                              | Not specified, no references given                    | <i>“... to explore the perceptions of patients with chronic pain and their physicians on OxyContin discontinuation and the impact that it had on chronic pain care and management.”</i>                                                                                                                                                                 | Key                                                                                                               | 16/20 | P |
| 30<br>31<br>32<br>33<br>34<br>35<br>36<br>37<br>38<br>39<br>40<br>41<br>42<br>43<br>44<br>45<br>46 | <b>8 Coyne et al 2015</b> <sup>22</sup> Assessment of a Stool Symptom Screener and Understanding the Opioid-Induced Constipation Symptom Experience                               | USA    | Cognitive interview semi structured think-aloud approach<br>N=66<br>(27M/39F) | Content analysis                                      | <i>“...to evaluate the content validity of the Stool Symptom Screener by assessing patient understanding of its items, patient ability to differentiate among response options, and patient perceptions about the use of a 2-week recall period for evaluating stool symptoms, BMs, and laxative use.<br/>- to evaluate how patients describe their</i> | PROM specific with additional questions about constipation                                                        | 17/20 | I |

|                                                                                                                                                                               |     |                                                                                                     |                                                                                                                 |                                                                                                                                                                                                                                              |                                     |       |   |
|-------------------------------------------------------------------------------------------------------------------------------------------------------------------------------|-----|-----------------------------------------------------------------------------------------------------|-----------------------------------------------------------------------------------------------------------------|----------------------------------------------------------------------------------------------------------------------------------------------------------------------------------------------------------------------------------------------|-------------------------------------|-------|---|
|                                                                                                                                                                               |     |                                                                                                     |                                                                                                                 | <i>constipation experience and to understand whether this differs between patients who frequently use laxatives and those who do not.</i>                                                                                                    |                                     |       |   |
| <b>9 Esquibel et al 2014</b> <sup>23</sup><br>Doctors and patients in pain: Conflict and collaboration in opioid prescription in primary care                                 | USA | In depth interviews with pts with CNCP receiving opioids and their physicians.<br>N=21 pts (8M/13F) | Immersion/crystallization process to generate a thematic codebook. Mixed methods with some quant. data analysis | <i>"...to better understand the effects of COT [chronic opioid therapy] on the doctor-patient relationship."</i>                                                                                                                             | Key                                 | 20/20 | R |
| <b>10 Frank et al 2016</b> <sup>24</sup><br>Patients' Perspectives on Tapering of Chronic Opioid Therapy: A Qualitative Study                                                 | USA | Semi-structured interviews<br>N=24 (11M/13F)                                                        | Team based, mixed inductive and deductive approach guided by the Health Belief Model                            | <i>"... to explore patients' perspectives on opioid tapering."</i>                                                                                                                                                                           | Key                                 | 20/20 | R |
| <b>11 Green et al 2017</b> <sup>25</sup><br>Perpetuating stigma or reducing risk? Perspectives from naloxone consumers and pharmacists on pharmacy-based naloxone in 2 states | USA | 8 focus groups (only 2 with patients with chronic pain)<br>N=15 (8M/7F)                             | Thematic analysis. Content analysis with a collaborative codebook development process                           | <i>"...to explore the attitudes of various stakeholders toward pharmacy-based naloxone and opioid medication safety and to capture the range of initial experiences with pharmacy naloxone in 2 states with pharmacy naloxone policies."</i> | Naloxone specific thematically thin | 18/20 | P |

|                                                                                              |                                                                                                                                                                                                                       |     |                                                                                                                                    |                                                                                         |                                                                                                                                                                                                                                                                                                                                                                   |                                              |       |   |
|----------------------------------------------------------------------------------------------|-----------------------------------------------------------------------------------------------------------------------------------------------------------------------------------------------------------------------|-----|------------------------------------------------------------------------------------------------------------------------------------|-----------------------------------------------------------------------------------------|-------------------------------------------------------------------------------------------------------------------------------------------------------------------------------------------------------------------------------------------------------------------------------------------------------------------------------------------------------------------|----------------------------------------------|-------|---|
| 1<br>2<br>3<br>4<br>5<br>6<br>7<br>8<br>9<br>10<br>11                                        | <b>12 Hooten et al 2011</b> <sup>26</sup><br>Smoking Cessation and<br>Chronic Pain: Patient<br>and Pain Medicine<br>Physician Attitudes                                                                               | USA | N = 18<br>Interviews<br>N= 15 and<br>focus group<br>N=3 10M/8F                                                                     | Participatory<br>research,<br>mixed<br>methods -<br>Thematic and<br>content<br>analysis | <i>"...to determine the attitudes and beliefs of<br/>both patients and pain medicine physicians<br/>regarding smoking cessation interventions<br/>applied during pain therapy."</i>                                                                                                                                                                               | Main focus<br>smoking cessation              | 18/20 | I |
| 12<br>13<br>14<br>15<br>16<br>17<br>18<br>19<br>20                                           | <b>13 Krebs et al 2014</b> <sup>27</sup><br>Barriers to Guideline-<br>Concordant Opioid<br>Management in Primary<br>Care—A Qualitative<br>Study                                                                       | USA | Semi<br>structured<br>interviews<br>N= 26<br>patients (14<br>PC<br>physicians)<br>13M/13F                                          | Immersion<br>crystallization<br>approach                                                | <i>"...to better understand primary care<br/>physicians' and patients' perspectives on<br/>recommended opioid management practices<br/>and to identify potential barriers and<br/>facilitators of guideline concordant<br/>opioid management in primary care."</i>                                                                                                | USA specific<br>barriers to<br>guideline use | 16/20 | P |
| 21<br>22<br>23<br>24<br>25<br>26<br>27<br>28<br>29<br>30                                     | <b>14 Matthias et al 2013</b> <sup>28</sup><br>Communicating<br>about opioids for<br>chronic pain: A<br>qualitative study of<br>patient attributions and<br>the influence of<br>the patient–physician<br>relationship | USA | Audio<br>Recordings<br>of primary<br>care visits<br>and Semi-<br>structured<br>interviews<br>after clinic<br>visit. N=30<br>26M/4F | Immersion/cry<br>stallization<br>approach                                               | <i>"...to advance understanding about<br/>communication about opioids by directly<br/>capturing clinical communication about<br/>opioids, as well as interviewing patients to<br/>gain insight into communication patterns and<br/>their broader relationships with their<br/>physicians, and how these relationships shape<br/>communication about opioids."</i> | USA veterans<br>medical centre.              | 18/20 | R |
| 31<br>32<br>33<br>34<br>35<br>36<br>37<br>38<br>39<br>40<br>41<br>42<br>43<br>44<br>45<br>46 | <b>15 McCrorie et al<br/>2015</b> <sup>29</sup><br>Understanding<br>long-term opioid<br>prescribing for non-<br>cancer pain in primary<br>care: a qualitative<br>study                                                | UK  | Semi<br>structured<br>interviews<br>with patients<br>(focus<br>groups with<br>GPs) N=23                                            | Grounded<br>approach for<br>thematic<br>analysis.<br>Constant<br>comparison             | <i>"... to understand the processes which bring<br/>about and perpetuate long-term prescribing of<br/>opioids for chronic, non-cancer pain. We<br/>interviewed patients and GPs about their<br/>experiences, beliefs and expectations of<br/>analgesia prescribing, to improve<br/>understanding of how problematic long-term</i>                                 | Key                                          | 17/20 | R |

|                                                                                                                                                                                                    |           |                                             |                                                                                                                                         |                                                                                                                                                                                                                                                                                                                                                                                                                                         |                                                                     |       |   |
|----------------------------------------------------------------------------------------------------------------------------------------------------------------------------------------------------|-----------|---------------------------------------------|-----------------------------------------------------------------------------------------------------------------------------------------|-----------------------------------------------------------------------------------------------------------------------------------------------------------------------------------------------------------------------------------------------------------------------------------------------------------------------------------------------------------------------------------------------------------------------------------------|---------------------------------------------------------------------|-------|---|
|                                                                                                                                                                                                    |           | 6M/17F                                      |                                                                                                                                         | <i>opioid prescribing becomes established”.</i>                                                                                                                                                                                                                                                                                                                                                                                         |                                                                     |       |   |
| <b>16 Mueller et al 2016</b> <sup>30</sup><br>Attitudes Toward Naloxone Prescribing in Clinical Settings: A Qualitative Study of Patients Prescribed High Dose Opioids for Chronic Non-Cancer Pain | USA       | Semi-structured interview<br>N=24<br>8M/16F | Ethnographic iterative methods. Inductive and deductive approaches                                                                      | <i>“This study assessed the knowledge and attitudes toward naloxone prescribing among non-cancer patients prescribed opioids in primary care.”</i>                                                                                                                                                                                                                                                                                      | Naloxone specific                                                   | 16/20 | I |
| <b>17 Paterson et al 2016</b> <sup>31</sup><br>Resisting Prescribed Opioids: A Qualitative Study of Decision Making in Patients Taking Opioids for Chronic Noncancer Pain                          | Australia | Qualitative individual interviews<br>N=20   | Constant comparison and decision making explored in depth and with a thematic analysis utilizing a published "Model of medicine-taking" | <i>“...to identify the varying influences on patients’ decisions about their use of prescribed long-term opioids. The research questions are: 1) does this conceptual Model of medicine-taking apply to people taking prescribed opioids, 2) is the concept of “resistance” to medication useful in this context, and 3) does this concept lead to new insights which may improve communication and shared decision making between”</i> | Key. Patients interested in non-medication pain management options. | 18/20 | P |
| <b>18 Penney et al 2016</b> <sup>32</sup><br>Provider and patient perspectives on opioids                                                                                                          | USA       | 11 Focus groups N=80 and                    | Thematic coding ref Ryan, Bernard                                                                                                       | <i>“...to identify the practical issues patients and providers face when accessing alternatives to opioids, and how multiple parties view these</i>                                                                                                                                                                                                                                                                                     | FG and interview questions not opioid specific. No                  | 13/20 | P |

|                                                                                                                                                                         |        |                                                        |                                                                                          |                                                                                                                                                                                                                                                                                                                                                                           |                                                                   |       |   |
|-------------------------------------------------------------------------------------------------------------------------------------------------------------------------|--------|--------------------------------------------------------|------------------------------------------------------------------------------------------|---------------------------------------------------------------------------------------------------------------------------------------------------------------------------------------------------------------------------------------------------------------------------------------------------------------------------------------------------------------------------|-------------------------------------------------------------------|-------|---|
| and alternative treatments for managing chronic pain: a qualitative study                                                                                               |        | individual interviews<br>N=10<br>27M/63F               | 2003                                                                                     | <i>issues.</i> ”                                                                                                                                                                                                                                                                                                                                                          | demographics                                                      |       |   |
| <b>19 Rieb et al 2016</b> <sup>33</sup><br>Withdrawal-associated injury site pain (WISP): a descriptive case series of an opioid cessation phenomenon                   | Canada | In person semi structured interviews<br>N=21<br>14M/7F | Deductive and inductive approaches. Use of survey and emergent interview themes          | <i>“.... to document the existence and characteristics of this pain phenomenon that we have named withdrawal-associated injury site pain (WISP).”</i>                                                                                                                                                                                                                     | Thematically thin. Specific to 2 weeks post withdrawal of opioids | 18/20 | P |
| <b>20 Simmonds et al 2015</b> <sup>34</sup> A Qualitative Study of Veterans on Long-Term Opioid Analgesics: Barriers and Facilitators to Multimodality Pain Management  | USA    | Semi structured focus groups x 3<br>N=25<br>17M/8F     | Grounded theory-informed approach. Framework provided by the theory of planned behaviour | <i>“...to examine barriers and facilitators to multimodality chronic pain care among veterans on high-dose opioid analgesics for chronic non-cancer pain.”</i>                                                                                                                                                                                                            | USA veteran specific.                                             | 16/20 | P |
| <b>21 St Marie et al 2016</b> <sup>35</sup> Primary care experiences of people who live with chronic pain and receive opioids to manage pain: A qualitative methodology | USA    | Semistructured interviews.<br>N=12 6M/6F               | Thematic and interpretive analyses                                                       | <i>“...to provide a deeper understanding of the experiences, issues, and challenges that people face who live with chronic pain and received opioids to help manage their pain in primary care. The following research questions were addressed: (a) What are the experiences of individuals who live with chronic pain and receive opioid pain medications to manage</i> | 9/12 had a history of substance use disorder                      | 19/20 | R |



|                                                                                                                                                                                      |     |                                                                               |                                                    |                                                                                                                                                                                                                                 |                                                                                  |       |   |
|--------------------------------------------------------------------------------------------------------------------------------------------------------------------------------------|-----|-------------------------------------------------------------------------------|----------------------------------------------------|---------------------------------------------------------------------------------------------------------------------------------------------------------------------------------------------------------------------------------|----------------------------------------------------------------------------------|-------|---|
|                                                                                                                                                                                      |     |                                                                               |                                                    | <i>their pain in primary care? (b) What have been their healthcare experiences as they strive to manage their pain?"</i>                                                                                                        |                                                                                  |       |   |
| <b>22 Vallerand et al 1 2009</b> <sup>36</sup> Chronic Opioid Therapy for Nonmalignant Pain: The Patient's Perspective. Part I—Life Before and After Opioid Therapy                  | USA | In depth serial interviews<br>N=22<br>6M/16F                                  | Phenomenologic study / Constant comparative method | <i>"...to examine the lived experience of adults receiving opioid therapy for relief of chronic non-malignant pain through the examination of data obtained through serial taper recorded interviews."</i>                      | Same cohort as study below.                                                      | 14/20 | R |
| <b>23 Vallerand et al 2 2010</b> <sup>37</sup> Chronic Opioid Therapy for Non-malignant Pain: The Patient's Perspective. Part II—Barriers to Chronic Opioid Therapy                  | USA | In depth serial narrative interviews<br>N=22<br>6M/16F                        | Phenomenologic study / Constant comparative method | <i>"...to elucidate the essence of the lived experience of patients receiving chronic opioid therapy for chronic non-malignant pain through examining their life narratives."</i>                                               | Same cohort as study above. Medication costs and medication may be USA specific. | 13/20 | R |
| <b>24 Wallace et al 2014</b> <sup>38</sup> Voices that may not otherwise be heard: a qualitative exploration into the perspectives of primary care patients living with chronic pain | USA | Photovoice photos, Interviews<br>1st N=31 2nd N=25 , and focus groups<br>N=19 | Grounded theory                                    | <i>"...this study examined the utility of a combination of qualitative methods (Photovoice, one-on-one interviews, and focus groups) in examining the daily experiences of primary care patients living with chronic pain".</i> | All receiving opioid meds for CNCP for at least 6ms                              | 16/20 | R |
| <b>25 Warms et al 2005</b> <sup>39</sup> There are a few things you did not ask about my pain: writing on the margins of a survey                                                    | USA | Comments written in the margins of a questionnaire<br>N=797                   | Content analysis                                   | <i>"...to determine the characteristics of those who wrote comments [written in the margin of survey questionnaire] and to understand what was being communicated in their comments."</i>                                       | Primarily about spinal cord injury and amputation.                               | 16/20 | P |

|                                                                                                                                                                                                             |               |                                                                         |                                                           |                                                                                                                                                    |                                                                                                                                                                                              |       |   |
|-------------------------------------------------------------------------------------------------------------------------------------------------------------------------------------------------------------|---------------|-------------------------------------------------------------------------|-----------------------------------------------------------|----------------------------------------------------------------------------------------------------------------------------------------------------|----------------------------------------------------------------------------------------------------------------------------------------------------------------------------------------------|-------|---|
| 26 <b>Zgierska et al 2016</b><br>40 Mindfulness<br>Meditation-Based<br>Intervention Is Feasible,<br>Acceptable, and Safe for<br>Chronic Low Back Pain<br>Requiring<br>Long-Term Daily<br>Opioid Therapy     | USA           | Qual data on<br>treatment<br>satisfaction<br>and<br>experience<br>N= 17 | Qualitative<br>analysis<br>methods.<br>Grounded<br>theory | <i>"... to determine feasibility, acceptability, and safety of an MM-based intervention in patients with CLBP requiring daily opioid therapy."</i> | Focus is on<br>evaluating an<br>intervention                                                                                                                                                 | 18/20 | I |
| 27 <b>Zheng et al 2013</b><br>41Chaos to Hope: A<br>Narrative of Healing                                                                                                                                    | Australi<br>a | In depth qual<br>interviews<br>(N=20)<br>10M/10F                        | Illness<br>narratives.<br>Thematic<br>analysis            | <i>"...to investigate the progression of the illness and opioid journeys of people who are taking opioids for chronic non-cancer pain".</i>        | Key Qualitative<br>study nested in a<br>RCT investigating<br>the role of<br>acupuncture in<br>reducing opioid<br>medication<br>consumption by<br>patients with<br>chronic non-cancer<br>pain | 17/20 | P |
| <b>Rerun of search</b>                                                                                                                                                                                      |               |                                                                         |                                                           |                                                                                                                                                    |                                                                                                                                                                                              |       |   |
| 28 <b>Al Achkar et al 2017</b> 42 Exploring<br>perceptions and<br>experiences of patients<br>who have chronic pain<br>as state prescription<br>opioid policies change:<br>a qualitative study in<br>Indiana | USA           | N=9<br>3M/6F                                                            | Inductive<br>emergent<br>thematic<br>analysis             | <i>"...to evaluate the impact of Indiana's opioid prescription legislation on the patient experiences around pain management."</i>                 | USA state specific                                                                                                                                                                           | 19/20 | R |
| 29 <b>Matthias et al 2017</b><br>43 "I'm Not Gonna Pull                                                                                                                                                     | USA           | N=37<br>12M/25F                                                         | Inductive<br>approach,                                    | <i>"...to understand communication processes related to opioid tapering."</i>                                                                      | Key                                                                                                                                                                                          | 19/20 | R |

1  
2  
3  
4  
5  
6  
7  
8  
9  
10  
11  
12  
13  
14  
15  
16  
17  
18  
19  
20  
21  
22  
23  
24  
25  
26  
27  
28  
29  
30  
31  
32  
33  
34  
35  
36  
37  
38  
39  
40  
41  
42  
43  
44  
45  
46

|                                                                                                                                                                                                               |     |                |                                                                                              |                                                                                                                                                                                                                                                              |                                                                   |       |   |
|---------------------------------------------------------------------------------------------------------------------------------------------------------------------------------------------------------------|-----|----------------|----------------------------------------------------------------------------------------------|--------------------------------------------------------------------------------------------------------------------------------------------------------------------------------------------------------------------------------------------------------------|-------------------------------------------------------------------|-------|---|
| the Rug out From Under You": Patient-Provider Communication About Opioid Tapering                                                                                                                             |     |                | constant comparison                                                                          |                                                                                                                                                                                                                                                              |                                                                   |       |   |
| <b>30 Matthias et al 2018</b><br>44 "I Was a Little Surprised": Qualitative Insights From Patients Enrolled in a 12-Month Trial Comparing Opioids With Nonopioid Medications for Chronic Musculoskeletal Pain | USA | N=34<br>28M/6F | Inductive approach, constant comparison                                                      | <i>"...to understand patients' experiences with the SPACE trial including their views and anticipated benefits of opioids, versus non - opioids, experiences with the intervention and to what extent expectations were met after completing the study."</i> | Only used data of 18 who had experience of opioid medication      | 18/20 | R |
| <b>31 Smith et al 2018</b> 45<br>Seeking Chronic Pain Relief: A Hermeneutic Exploration                                                                                                                       | USA | N=15<br>4M/11F | Concurrent embedded mixed methods design, Heideggerian hermeneutic phenomenological approach | <i>"This research presents an interpretation of the experience of seeking pain relief for a group of people taking opioid pain medications whose pain is not adequately controlled"</i>                                                                      | Key but recruited through internet Specifically uncontrolled pain | 20/20 | P |

Legend: GRADE-CERQual Relevance component: R= Relevant, P= Partial relevance, I= Indirect relevance, U=Uncertain relevance

#### *Step 5 Translating studies into each other*

Patterns and associations between categories were explored and all researchers felt that a line of argument approach as defined by Noblit and Hare <sup>7</sup> would be the most useful method to interpret the data.

#### *Step 6 Synthesising Translations*

Agreement was reached by clearly defining the over-arching or 3<sup>rd</sup> order concepts arising from the data. A third order concept is the reviewers' interpretation of second order concepts.

#### *Step 7 Expressing the synthesis*

We developed a conceptual model to show how the themes related to each other in a line of argument. (see figure 1)

*Insert figure 1 about here.*

#### *Patient and Public Involvement*

We did not involve patients or the public in our work.

#### *Findings*

Two reviewers VN and ST screened 2994 titles or abstracts (after the removal of duplicates from the 5064 citations retrieved) and identified 153 full texts of interest.

Two reviewers VN and KS read these and 122 were excluded. Reasons are given in the PRISMA flowchart, see figure 2. The reviewers agreed to include 31 studies. The included studies were from US (24), Canada (4) UK (2), and Australia (2) and used a range of qualitative methods.

We report the 4 facets of GRADE-CERQual for all papers. 1) Methodological 2) Confidence 3) Relevance 4) Adequacy of data - See table 2 below.

Table 2 Confidence in review findings: GRADE-CERQual assessment

| Review findings                                           | Studies contributing                                                               | Methodological limitations         | Relevance                               | Coherence      | Adequacy of data |
|-----------------------------------------------------------|------------------------------------------------------------------------------------|------------------------------------|-----------------------------------------|----------------|------------------|
| Reluctant users with little choice                        | 1,3,4,5,6,7,17,18,21,22,26,27,30 (13 studies)                                      | 7 no concerns                      | 4 Relevant<br>6 Partial<br>2 Indirect   | No concerns    | No concerns      |
| Understanding opioids: the good the bad                   | 1,3,7,9,10,11,15,16,17,23,25,27,29. (13 studies)                                   | 11 no concerns<br>1 minor concerns | 6 Relevant<br>5 Partial<br>1 Indirect   | No concerns    | No concerns      |
| A therapeutic alliance: not always on the same page       | 1,2,3,4,5,7,9,10,11,13,14,15,16,17,18,19,20,21,22,23,24,25,26,28,29,31(26 studies) | 23 no concerns<br>3 minor concerns | 10 Relevant<br>10 Partial<br>3 Indirect | No concerns    | No concerns      |
| Stigma: feeling scared, and secretive but needing support | 1,2,3,4,7,9,10,14,16,17,18,20,21,22,23,24,27,28,31 (19 studies)                    | 11 no concerns<br>3 minor concerns | 8 Relevant<br>8 Partial<br>1 Indirect   | No concerns    | No concerns      |
| The challenge of tapering/ withdrawal from opioids        | 7,10,18,19,30,31                                                                   | 5 no concerns<br>1 minor concerns  | 3 Relevant<br>3 Partial                 | Minor concerns | Minor concerns   |

Legend of GRADE-CERQual component scoring:

|                                                         |                                                                                      |
|---------------------------------------------------------|--------------------------------------------------------------------------------------|
| Methodological limitations, Coherence, Adequacy of data | No or very minor concerns<br>Minor concerns<br>Moderate concerns<br>Serious concerns |
| Relevance:                                              | Relevant<br>Partial<br>Indirect<br>Uncertain                                         |

### *Synthesis of Findings*

We abstracted five themes from the 2<sup>nd</sup> order concepts. Table 3 below shows how each study contributed to each theme. We have illustrated each concept with exemplary quotations.

Table 3 Themes apparent in each study

| Author date                    | RU | U | TA | S | TW |
|--------------------------------|----|---|----|---|----|
| 1 Arnaert and Ciccotosto 2006  | X  | X | X  | X |    |
| 2 Bergman, Matthias et al 2013 |    |   | X  | X |    |
| 3 Blake, Ruel et al 2007       | X  | X | X  | X |    |

|                                  |           |          |           |          |           |
|----------------------------------|-----------|----------|-----------|----------|-----------|
| 4 Brooks, Unruh et al 2015       | X         |          | X         | X        |           |
| 5 Buchbinder, Wilbur et al 2014  | X         |          | X         |          |           |
| 6 Chang Y-P, Wray et al 2011     | X         |          |           |          |           |
| 7 Chang,F and Ibrahim,S 2017     | X         | X        | X         | X        | X         |
| 8 Coyne, Currie et al 2015       |           |          |           |          |           |
| 9 Esquibel and Borkan 2014       |           | X        | X         | X        |           |
| 10 Frank, Levy et al 2016        |           | X        | X         | X        | X         |
| 11 Green, Case et al 2017        |           | X        | X         |          |           |
| 12 Hooten, Vickers et al 2011    |           |          |           |          |           |
| 13 Krebs, Bergman et al 2014     |           |          | X         |          |           |
| 14 Matthias,Krebs et al 2013     |           |          | X         | X        |           |
| 15 McCrorie, Closs et al 2015    |           | X        | X         |          |           |
| 16 Mueller, Koester et al 2016   |           | X        | X         | X        |           |
| 17 Paterson, Ledgerwood 2016     | X         | X        | X         | X        |           |
| 18 Penney, Ritenbaugh et al 2016 | X         |          | X         | X        | X         |
| 19 Rieb, Norman et al 2016       |           |          | X         |          | X         |
| 20 Simmonds, Finley et al 2015   |           |          | X         | X        |           |
| 21 St Marie et al 2015           | X         |          | X         | X        |           |
| 22 Vallerand et al 1 2009        | X         |          | X         | X        |           |
| 23 Vallerand et al 2 2010        |           | X        | X         | X        |           |
| 24 Wallace et al 2014            |           |          | X         | X        |           |
| 25 Warms et al 2005 o            |           | X        | X         |          |           |
| 26 Zgierska et al 2016           | X         |          | X         |          |           |
| 27 Zheng et al 2013              | X         | X        |           | X        |           |
| <b>Studies from search rerun</b> | <b>RU</b> | <b>U</b> | <b>TA</b> | <b>S</b> | <b>TW</b> |
| 28 Al Achkar et al 2017          |           |          | X         | X        | X         |
| 29 Matthias et al 2017           |           | X        | X         |          | X         |
| 30 Matthias et al 2018           | X         |          |           |          |           |
| 31 Smith et al 2018              |           |          | X         | X        |           |

**Legend:**

RU = Reluctant users with little choice

U = Understanding about opioids: the good and the bad

TA = A therapeutic alliance: not always on the same page

S = Stigma: feeling scared, and secretive but needing support

TW = The challenges of tapering or withdrawal

X = theme present in paper

**1) Reluctant users with little choice**

This describes a resistance or hesitancy to take opioids mainly due to concerns about side effects or addiction, although they felt there were no other options available.

*“I don’t want to become addicted, if I’m going to become addicted then as far as I’m concerned I’m a druggie, so I might as well not be here anyway, so I don’t want to become addicted...”* Blake et al Pg103

1  
2  
3 *“I just didn’t want to go on them because I mean once you get on them that’s*  
4 *it, you’re sort of stuck on them. I didn’t want to take morphine at first because*  
5 *there was a girl that I went through one of the courses with and she always*  
6 *seemed really dopey and drugged up so it took them a long while*  
7 *to talk me to into taking the morphine because I didn’t want to be like that.*

8  
9  
10  
11  
12  
13  
14  
15 Zheng et al pg 1832

16  
17 Some spoke of underusing or were keen to reduce their medications when possible.

18  
19 There was a dislike of being on long term medication and some thought that it would  
20  
21 not relieve their pain.

22  
23  
24 *“I don’t want to do that [take more morphine]. I want to stay on as little as I*  
25 *possibly can because there might come a time when I need more and I don’t*  
26 *want to be on high doses. I’ve always tried to keep it at a minimum amount of*  
27 *tablets each day...”* Blake et al Pg 105

28  
29  
30  
31  
32  
33 Even though some were reluctant there were other instances of dramatic improvement  
34  
35 in people’s lives. This then weighted their choice to stay on the opioids.

36  
37  
38 *“I mean it is just like a miracle as far as I am concerned. It is like knowing it*  
39 *[the pain] is there but you have the instruments to prevent it from getting out*  
40 *and [be]coming a roaring demon.”* Vallerand et al 1pg 170

41  
42  
43  
44  
45 *“But opiates, that’s my way of life. There would be no life if I didn’t have this.*  
46 *And I thank God for them because without them I’d be...well I wouldn’t be. I*  
47 *just couldn’t go on. I would have committed suicide a long time ago. And I say*  
48 *that truthfully cause you could not live like that, with that constant, constant*  
49 *pain. But, with the opiates it’s made it possible to be able to have a part of a*  
50 *life, you know.”* Brooks et al pg 20

## 2) Understanding opioids: the good and the bad

This describes patients' knowledge or understanding about opioids which had generally been acquired ad hoc and slowly over time, from pharmacists, patient package inserts in their medication, leaflets, the internet, television programmes and from doctors, especially doctors at the pain clinic.

*"When you see it in the media, when you see it on the television, you think if you're taking regular morphine you must be in a pretty bad way, you know."*

Blake et al Pg103

*"I always ask before I go on a medication, what are the side effects, I was told I may experience constipation; nothing else was explained to me."*

Paterson et al pg 721

There was often poor knowledge about using opioids for chronic pain, and about addiction, overdose risk and side effects.

*"There's not too much education about it [overdose]... When I first started taking it [the opioid medication], no one told me about OD[overdose]or anything about that. Because I was taking it not [as] prescribed...I was just like when I felt pain I would just take like five or six of them or whatever. Then at the end, I'd run out."* Mueller et al pg 279

Patients often had to defend their usage and this added to their stress especially when they felt their healthcare professionals lacked an understanding of the place for opioids in the treatment of CNMP or were cautious about using them.

*"The concern is that if they increase my opioid dosage, I could stop breathing.*

*It's ridiculous."* Frank et al Pg1841

*"There are still a lot of doctors out there that are against it. They think it is bad. Bad medicine. Bad practice."* Vallerand et al 2 pg 129



1  
2  
3 In contrast, some people felt well informed which either produced more concern or  
4  
5 gave the patients confidence in their opioid regime.  
6

7  
8 *“... and from what I’ve read up, because I like to, sort of, keep on top of*  
9  
10 *things, that it’s an opium based drug, so you will build up some tolerance and*  
11  
12 *you will build up [becomes tearful] And you will potentially become sort of*  
13  
14 *addicted to it, if you like.” McCrorie et al pg 3*  
15

16  
17 *“Under Dr A [pain clinic] I’ve learnt more. And my concern has been, well it*  
18  
19 *was initially the possibility of addiction, but she has assured me that I’m not*  
20  
21 *showing no signs of addiction at all. I may have some withdrawal problems”*  
22

23  
24 Paterson et al Pg 721  
25

### 26 27 28 **3) A therapeutic alliance: not always on the same page** 29

30 This describes a therapeutic alliance or the relationship between patients and their  
31  
32 health care providers which was considered important.  
33

34 Overall there was a feeling that HCPs and patients were often ‘not on the same page’  
35  
36 about opioid usage.  
37

38  
39 *“My family doctor...does not want me to be dependent on heavy pain meds, so*  
40  
41 *I am intensely miserable 99% of the time.” Warms et al pg 252*  
42

43  
44 Some patients felt they were not listened to and were frustrated by a lack of empathy  
45  
46 from physicians regarding their pain experience.  
47

48  
49 *“I frequently have difficulty with the residents (doctors in training) explaining*  
50  
51 *why these drugs, this many drugs...Finally Dr. [family physician] wrote a note*  
52  
53 *in my file – stop harassing [participant’s name]. This is what she gets and why*  
54  
55 *she gets it. And they did stop but it was inconvenient. For instance, they would*  
56  
57 *not prescribe me three months at a time. I would be dispensed one month at a*  
58  
59  
60

1  
2  
3 *time. And for someone who had been taking the same drugs for 10 years I*  
4  
5 *found that condescending.* ” Brooks et al pg 18  
6  
7

8 A reluctance to prescribe from GPs and pharmacists and the use of opioid contracts or  
9  
10 a restriction of medication were often considered punitive.  
11

12 *“It kind of made me feel like I was doing something wrong, which I wasn’t,*  
13  
14 *but I signed a contract. You know, what would I be without my meds?”* Krebs  
15  
16 et al pg 1152  
17

18  
19 *“And I told my doctor that, that I wanted so I could sleep through the night.*  
20  
21 *And now he, well, I’ll give you 10, but it’s got to last. Like he treats me like a*  
22  
23 *drug addict.”* Penney et al pg 6  
24  
25

26 The healthcare system often worked against a therapeutic alliance with lack of  
27  
28 continuity or care or frequent visits which fed into mistrust. Patients complained that  
29  
30 provider turnover affected their ability to receive individualised care; conversations  
31  
32 about pain and treatment options often had to be started over again from scratch.  
33  
34

35 *“I don’t have the same doctor long enough to know”.* Bergman et al pg 1693  
36

37 However having blood or urine tests for levels of opioids and regular checks were  
38  
39 seen by some as being cared for.  
40  
41

42 *“I would say, ‘I have this agreement and you don’t have to sign it if you don’t*  
43  
44 *want to, but I would like to go over it with you. These are suggestions because*  
45  
46 *this medication is addictive, it is dangerous, and I just want to make sure*  
47  
48 *you’re aware.’ I think if you really want to make it where people are not*  
49  
50 *hostile, say they have to have a urine test every 6 months, everybody, and that*  
51  
52 *it’s a policy because we care about all of you.’”* Krebs et al pg 1152  
53  
54

55  
56 Some talked of the need for good relationships built on trust, shared decision making  
57  
58 and knowledgeable specialists who communicate well.  
59  
60

1  
2  
3 *“I wouldn’t say I researched it to that depth, you know, I read a little bit*  
4 *about, and asked a lot of questions at my doctor, and then we decided.”*

5  
6  
7  
8 Paterson pg 722  
9

#### 10 11 **4) Stigma: feeling scared and secretive but needing support**

12  
13 This describes feelings of stigma and fear which people expressed directly in relation  
14 to their opioid usage. This includes peoples’ negative attitudes from family, medical  
15 professionals and work colleagues which lead to them feeling stigmatised and judged  
16 for taking opioids.  
17  
18  
19  
20  
21

22  
23 *“So I’m constantly trying to clean up because I think people are going to*  
24 *judge me. ‘Oh, because she’s on all this medication, ooh, she can’t look after*  
25 *her children.’” Paterson et al pg 724*

26  
27  
28  
29  
30 *“As soon as you mention to someone that you are on pain medication it’s, ‘Oh*  
31 *my god, you’ve got to get off it.’ It is viewed as weak. Somehow I am weak for*  
32 *being on this medication.” Vallerand et al 2 pg 128*  
33  
34  
35

36  
37 To protect themselves some chose to keep their opioids a secret.

38  
39 *“But you know, after 2 years of pain, you are physically exhausted, mentally*  
40 *exhausted and depressed. So, I take my medication and I hide it at the bottom*  
41 *of my drawer. It’s my secret life. It’s always a secret, and I’ve got to hide it*  
42 *and not tell anyone.” Vallerand et al 1 pg 169*  
43  
44  
45  
46  
47

48  
49 Some people made a conscious decision about who they could tell and who they  
50 couldn’t due to negative reactions. Relationships suffered when patients felt  
51 unsupported.  
52  
53

54  
55 *“My son told me I was a drug addict. He did. He really did. He was to the*  
56 *point, he didn’t know what he could do for me. It really was that bad.”*  
57  
58

59  
60 Vallerand et al 2 pg 128

1  
2  
3 *“I had originally told my sister and she was very concerned. Then she said,*  
4 *‘As long as you don’t stay on them.’ She thought it was OK if I did it for a*  
5 *while but as long as I didn’t stay on them. So I just sort of never told her. And*  
6 *she never asked.”* Vallerand et al 2 pg 128  
7  
8  
9  
10  
11

12 Although some seemed confident in using opioids, mostly people spoke about fears  
13 such as; addiction and uncontrolled pain. Feeling supported validated their choices  
14 and experiences and lessened some of their fears and concerns.  
15  
16  
17

18  
19 *“And at the end, my partner says—we sat down there and he goes ‘Stay on*  
20 *them.’ ...I’ve always spoke to my partner, and if he’s been unsure— we’ve*  
21 *both been unsure, we’ve both gone into the doctor together to ask questions.”*  
22  
23  
24  
25  
26 Zheng et al pg 1834  
27

28 *“my wife wanted me to take this medication. She was like: let’s go for it.”*  
29  
30  
31 Arnaert et al pg 26  
32  
33

### 34 **5) The challenge of tapering/withdrawal from opioids**

35  
36  
37 Four papers <sup>21, 24 42, 43</sup> explore patients’ experiences of tapering or withdrawing as  
38 their main content. Two further papers <sup>32, 33</sup> addressed it as a more peripheral issue  
39 (see CERQual ratings in table 2). This describes the challenges and profound effects  
40 of tapering or withdrawing from opioids.  
41  
42  
43

44 Tapering and withdrawing from opioids could be challenging and provoke anxiety.  
45  
46

47  
48 *“I have a tremendous fear in a doctor saying I want you to taper off the*  
49 *methadone and get totally off the methadone with no alternative whatsoever. I*  
50 *think that would be an irrational decision by a doctor, and I probably*  
51 *wouldn’t take that advice.”* Frank et al pg1842  
52  
53  
54  
55

56  
57 This anxiety could be alleviated by support from a trusted health care provider or  
58 other person.  
59  
60

1  
2  
3 *“The best thing about it was that nobody acted like I was a bad person*  
4 *because I was on these medications and was having to be going through this*  
5 *really slow process of coming down off of them.” Frank et al pg1843*  
6  
7  
8  
9

10 Successful tapering was described as a collaborative agreement between HCP and  
11 patient.  
12  
13

14 *“She put me down to 2 and a half [pills per day]. Then she said, okay, we’ll*  
15 *go down to half a pill. I told her I didn’t think that just 2 a day would do it,*  
16 *and she said okay, we’ll try 2 and a half, are you agreeable with that? I said*  
17 *that’s fine. I mean, we can discuss stuff. It doesn’t have to be a disagreement*  
18 *because we can talk about it. It’s not an argument. We’re 2 adults having a*  
19 *conversation, figuring out what to do.” Matthias et al 2017 pg 1369*  
20  
21  
22  
23  
24  
25  
26  
27

28 However, not all people experienced joint decision making when tapering  
29

30 *“I just don’t feel that he’s understanding. he don’t seem to care what I’m*  
31 *saying, because he’s lowering it down anyway, even though I’ve told*  
32 *him...that I didn’t agree with it being lowered.” Matthias et al 2017 pg 1369*  
33  
34  
35  
36

37 For those in the USA, prescribing policies, advising clinicians to monitor and  
38 decrease opioid use, and the legislation to enforce these policies made those taking  
39 opioids feel as if they were ‘a public health problem’. This could have a negative  
40 effect on the doctor patient relationship and leave the patient feeling disempowered.  
41  
42  
43  
44  
45  
46

47 This was compounded when opioids had been withdrawn by legislation.<sup>21, 42</sup>  
48

49 *“I have to struggle, suffer, to make the next the next time that I can get my*  
50 *medicine. And I don’t think that’s fair to me because if I can take my medicine*  
51 *a little more regularly, I would be able to do more.....I don’t think that the*  
52 *law, people, politicians, or anybody should be able to tell anybody that’s in*  
53 *pain what type of medicine they can take.” Al Achkar et al pg 7*  
54  
55  
56  
57  
58  
59  
60

1  
2  
3           *“That kinda got me mad, cause I thought well you know. . .they’re taking it off*  
4           *the market because of people abusing it. . .It’s not fair to us, you know. . . . I*  
5           *think the government was wrong to. . . pull them off the market, you know,*  
6           *because of people abusing them, no like they weren’t looking at the people*  
7           *that need them. . .But I think it’s really unfair that people that really do need*  
8           *them can’t get them.”* Chang and Ibrahim 2017 pg 3  
9  
10  
11  
12  
13  
14  
15  
16  
17

### 18           **Overarching theme: Constantly balancing**

19  
20           After considering the five themes, an overarching theme emerged - ‘Constant  
21           balancing’. The theme *Reluctant users with little choice* describes the need to balance  
22           the pros and cons of starting opioids and the need to balance having pain with their  
23           hesitancy to use opioids.  
24  
25  
26  
27  
28  
29

30           *“I don’t really like being on a lot of tablets, I’ve never been a tablet person,*  
31           *um. . . but I mean I can’t have the pain either so it’s one evil outdoing the*  
32           *other evil.* Paterson et al pg 723  
33  
34  
35  
36

37           Studies describe balancing the dose for pain management with their side effects to  
38           allow them to function. Participants constantly weighed up the effects on their life;  
39           dealing with an internal conflict of unresolved pain versus necessary medication,  
40           being opioid free versus having uncontrolled pain and balancing other stressors  
41           against opioid dose changes.  
42  
43  
44  
45  
46  
47

48           *“If you’re going to be able to walk, and you take one pain pill so you can walk*  
49           *and live life, you’re going to do it, even though you may not like it.”* Penney et  
50           al pg 6  
51  
52  
53  
54

55           The theme *Stigma feeling scared and secretive but needing support*, describes the  
56           need to balance their hopes for relief with fear of side effects, and also to balance  
57  
58  
59  
60

1  
2  
3 whether or not to disclose their opioid use with the risk of being labelled a ‘drug  
4  
5 seeker’ versus having unrelieved pain.  
6

7  
8 *“I do it for my own protection by not telling them because I see how they react*  
9  
10 *by reading something in the paper...and it’s just their ignorance. And I don’t*  
11  
12 *have time. Well they know what’s going on but they don’t get it to this day. So*  
13  
14 *you have to pick your battles...” Brooks et al pg 19*  
15

16  
17 The theme *Understanding opioids; the good and the bad*, showed people had different  
18  
19 levels of understanding but weighed up their decisions and trade-offs against their  
20  
21 pain relief.  
22

23  
24 *“It’s, it’s got a good and bad side, morphine. ....When I take it, it works*  
25  
26 *really, really well but it makes you feel rather sick, umm, rather spaced out*  
27  
28 *and thinking wise, umm, it outcomes more on the other, do I want to be sick or*  
29  
30 *do I want to cry with pain? So I’d rather be sick but it is a very, very good*  
31  
32 *painkiller. ” Blake et al pg 105*  
33

34  
35 The therapeutic alliance theme showed that often it was evident that they were ‘not on  
36  
37 the same page’ with them balancing the advice from their doctors with what they  
38  
39 wanted.  
40

41  
42 *“[My provider] said you could die any time, and my husband and I said, well,*  
43  
44 *we realize that, but because of the pain, you know, we were willing to take that*  
45  
46 *risk that I would die from the narcotic medication.” Frank et al pg 1841*  
47

48  
49 It also meant that there were multiple barriers to the process of decreasing opioids due  
50  
51 to this constant balancing act which is described in the theme *the challenge of*  
52  
53 *tapering/withdrawal from opioids.*  
54  
55  
56  
57  
58  
59  
60

1  
2  
3 *“I will tell her, if I do come off this medication, there are going to be*  
4 *consequences. I can’t walk as often, I can’t stand as long, I just can’t do*  
5 *it....” Vallerand et al 1 pg 169*  
6  
7  
8  
9

## 10 11 **Discussion**

12  
13 Our five themes were; 1) Reluctant users with little choice; 2) Understanding opioids:  
14 the good the bad; 3) A therapeutic alliance: not always on the same page; 4) Stigma:  
15 feeling scared and secretive but needing support; and 5) The challenge of tapering or  
16 withdrawal. An overarching theme of ‘constantly balancing’ emerged from the data.  
17  
18 These themes all had positive and negative aspects although the negative were more  
19 prevalent by far.  
20  
21

22 We present a line of argument of how complex it is for the patient to balance  
23 decisions at every stage of their journey. First their reluctance to start taking opioids  
24 but feeling they had no option. Patients are given opioids for CNMP often as a last  
25 resort when all other treatment has failed and their lives are so profoundly affected  
26 that they talk of a desperation, that they would literally ‘try anything’. Patients spoke  
27 about not being given any detailed information about opioids and that they had  
28 learned more about them over time from different sources. This varied understanding  
29 about opioids and their side effects can affect the decisions that people make. Patients  
30 reported the need to keep the dosage of opioids as low as possible and often that they  
31 were not at risk of addiction or overdose if they were taking them as prescribed. Even  
32 those who felt they may be addicted sometimes viewed this as an acceptable trade-off  
33 for short term pain relief. Our findings indicate that patient desperation combined  
34 with inadequate information from healthcare professionals could trigger the  
35 prescription of opioids. It may be that delivering accurate information about the  
36  
37  
38  
39  
40  
41  
42  
43  
44  
45  
46  
47  
48  
49  
50  
51  
52  
53  
54  
55  
56  
57  
58  
59  
60



1  
2  
3 potential side effects and limited efficacy of opioids for chronic pain management  
4  
5 would reduce the use of opioids.  
6

7  
8 Our findings demonstrate that the stigma surrounding how patients feel about being  
9  
10 on opioids can be compounded by the judgements of others. Although patients often  
11  
12 describe themselves in terms of ‘reluctant users’, if they experienced the benefits of  
13  
14 opioids through decreased pain and thus increased function they are often too scared  
15  
16 to reduce opioids and return to a life of potentially unmanaged pain.  
17

18  
19  
20  
21 Our findings suggest that clinicians and patients with chronic pain are not always ‘on  
22  
23 the same page’. The theme *Therapeutic alliance* captures the positives, but also the  
24  
25 tensions and mismatches of perceptions held by healthcare providers who are  
26  
27 attempting to limit dose escalation, and patients who may view constant dose  
28  
29 escalation as an acceptable trade-off for reducing relentless pain. The therapeutic  
30  
31 alliance is a robust theme supported by 26 of the 31 studies included. This is not  
32  
33 surprising as patients rely on their health care professionals to prescribe opioids. This  
34  
35 finding resonates with qualitative evidence syntheses (QES) exploring the experience  
36  
37 of patients <sup>11</sup> and healthcare professionals <sup>46</sup> It seems clear that joint decision -making  
38  
39 is important for appropriate healthcare; however, our findings suggests that there are  
40  
41 instances of mistrust on both sides. A QES exploring clinicians experience of  
42  
43 prescribing opioids for chronic pain demonstrate that the process of prescribing  
44  
45 opioids is not straightforward for clinicians who face a complex decision - ‘Should I  
46  
47 shouldn’t I’ prescribe opioids for chronic non-malignant pain <sup>46</sup>. They also  
48  
49 demonstrate that clinicians must walk a fine line to balance the pros and cons of  
50  
51 opioids whilst also maintaining patient trust. This suggests that both patients and  
52  
53  
54  
55  
56  
57  
58  
59  
60

1  
2  
3 HCPs find dealing with prescribing/taking opioids for CNMP is complex and involves  
4  
5 balancing and trade-offs.  
6

7  
8 Current guidance from Royal College of Anaesthetists in the UK and The Centers for  
9  
10 Disease Control and Prevention in the US advocate a preference for non-opioid  
11  
12 therapies in the treatment of CNMP<sup>47</sup>. If a clinician feels that opioids are indicated,  
13  
14 then they recommend a low dose for a short duration which should be assessed for  
15  
16 effectiveness and regularly evaluated for benefits and harms. All but four studies in  
17  
18 this review are between 2005 and 2017, prior to these guidelines. Although opioid  
19  
20 contracts in some areas of the USA and Canada can make patients feel stigmatised  
21  
22 and judged, this effect can be mediated by a good therapeutic relationship. Some  
23  
24 physicians may view contracts as necessary to guard against uncontrolled dose  
25  
26 escalation, repeated demands for replacement of lost or misplaced medication,  
27  
28 subversion and illicit opioid intake. This finding resonates with Towe et al (2017) who  
29  
30 describe the moral boundary work and social guardianship that clinicians associate  
31  
32 with opioid prescription. Our findings suggest that this role does may not contribute to  
33  
34 an effective therapeutic partnership.  
35  
36  
37  
38

#### 39 40 Limitations of this study

41  
42 A majority of the studies are from the United States and the findings need to be taken  
43  
44 in the context of its health and social care systems. Most of the articles in this  
45  
46 qualitative synthesis were published or the research was conducted, before the impact  
47  
48 of the opioid epidemic became clear to regulators and the medical profession. Further  
49  
50 evidence is needed to find out if these themes are universal for developed countries or  
51  
52 whether there are important differences.  
53

54  
55 Our conceptual framework highlights patients need to constantly balance and to  
56  
57 consider the pros and cons of taking opioids. This can have a profound effect on  
58  
59  
60

1  
2  
3 peoples' relationships with their family, friends and health care providers and their  
4  
5 perceived standing in the community which is reflected in their careful balancing of  
6  
7 disclosure. The therapeutic alliance and having a clear understanding of all the  
8  
9 positive and negative aspects of opioids were important factors that underpinned their  
10  
11 ability to maintain this fragile balance. This balance might also affect a person's  
12  
13 desire or ability to taper or withdraw from opioids.  
14  
15

16  
17 The GRADE-CERQual ratings (table 2) revealed we had confidence in the findings  
18  
19 with only a few minor concerns and no moderate or serious concerns.  
20  
21

## 22 23 **Conclusions and recommendations for future research**

24  
25 The first meta-ethnography on this topic revealed a constant balancing and a life in  
26  
27 flux in an effort to maintain participation in life and relationships. These are important  
28  
29 features of opioid use for CNMP. To maintain this delicate balance they often need  
30  
31 support from family or clinicians, however this balance can be upset by the feeling of  
32  
33 being judged by this same potential support system or peers and society at large  
34  
35 through the media. The therapeutic alliance with healthcare professionals, the extent  
36  
37 of people's understanding as well as the stigma attached to opioid use need to be  
38  
39 navigated by people who are often reluctant to be on opioids in the first place.  
40  
41  
42  
43

## 44 45 **Authors Contribution**

46  
47  
48 VN and KS contributed to the review concept and design as part of the I-WOTCH  
49  
50 process evaluation team. HS, SE, MU and KS were involved in the design of the  
51  
52 IWOTCH study. VN, KS and FT screened search results or extracted data, conducted  
53  
54 the analysis and synthesis. All authors contributed to data interpretation, revised the  
55  
56 final manuscript critically for important intellectual content and appraised the final  
57  
58 manuscript. VN prepared the final manuscript and will be the corresponding author.  
59  
60

## Funding

This project was funded by the National Institute for Health Research, Health Technology Assessment (project number 14/224/04). The views and opinions expressed therein are those of the authors and do not necessarily reflect those of the HTA, NIHR, NHS or the Department of Health. Ethics approval was provided by Yorkshire and the Humber South Yorkshire Research Ethics committee on 13-9-16.

## Declaration of competing interests

KS has undertaken other meta-ethnographies and was on the NIHR HS&DR Board until January 2018. The authors declared no potential conflicts of interest with respect to the research, authorship, and/or publication of this article.

SE is grant holder on a number of NIHR studies including being Co- chief investigator of the I-WOTCH study, he has prescribed opioids as part of his pain practice.

MU was Chair of the NICE accreditation advisory committee until March 2017 for which he received a fee. He is chief investigator or co-investigator on multiple previous and current research grants from the UK National Institute for Health Research, Arthritis Research UK and is a co-investigator on grants funded by the Australian NHMRC. He is an NIHR Senior Investigator. He has received travel expenses for speaking at conferences from the professional organisations hosting the conferences. He is a director and shareholder of Clinvivo Ltd that provides electronic data collection for health services research. He is part of an academic partnership with Serco Ltd related to return to work initiatives. He is a co-investigator on a study receiving support in kind from Stryker Ltd. He has accepted honoraria for teaching

1  
2  
3 from CARTA. He is an editor of the NIHR journal series, and a member of the NIHR  
4  
5 Journal Editors Group, for which he receives a fee.  
6  
7  
8  
9

10 Data Sharing Statement: No additional data are available  
11  
12  
13

## 14 Acknowledgements

15  
16 We would like to thank Samantha Johnson an academic librarian who helped with the  
17  
18 electronic searches and Dr Stephanie Tierney who helped to screen the citations.  
19  
20  
21

## 22 References

- 23  
24  
25 1. Breivik H, Collett B, Ventafridda V, et al. Survey of chronic pain in Europe: prevalence, impact on daily life, and treatment. *Eur J Pain*2006;10:287-333.
- 26  
27 2. Nahin RL. Estimates of pain prevalence and severity in adults: United States, 2012. *J Pain*2015;16:769-80.
- 28  
29 3. Els C, Jackson TD, Kunyk D, et al. Adverse events associated with medium- and long-term use of opioids for chronic non-cancer pain: an overview of Cochrane Reviews. *Cochrane Database of Systematic Reviews*2017.
- 30  
31 4. Gomes T, Tadrous M, Mamdani MM, et al. The burden of opioid-related mortality in the united states. *JAMA Network Open*2018;1:e180217.
- 32  
33 5. Furlan AD, Sandoval JA, Mailis-Gagnon A, et al. Opioids for chronic noncancer pain: a meta-analysis of effectiveness and side effects. *CMAJ*2006;174:1589-94.
- 34  
35 6. Busse JW, Wang L, Kamaleldin M, et al. Opioids for Chronic Noncancer Pain: A Systematic Review and Meta-analysis. *JAMA*2018;320:2448-60.
- 36  
37 7. Noblit GW and Hare RD. Meta-ethnography: Synthesizing qualitative studies. sage, 1988.
- 38  
39 8. France EF, Cunningham M, Ring N, et al. Improving reporting of meta-ethnography: The eMERGe reporting guidance. *J Adv Nurs*2019;75:1126-39.
- 40  
41 9. Manchikanti L, Helm S, 2nd, Fellows B, et al. Opioid epidemic in the United States. *Pain Physician*2012;15:ES9-38.
- 42  
43 10. Critical Appraisal Skills Programme (CASP). Oxford: Public Health Resource Unit, 2006.
- 44  
45 11. Toye F, Seers K and Barker KL. Meta-ethnography to understand healthcare professionals' experience of treating adults with chronic non-malignant pain. *BMJ Open*2017;7:e018411.
- 46  
47 12. Lewin S, Booth A, Glenton C, et al. Applying GRADE-CERQual to qualitative evidence synthesis findings: introduction to the series. *Implement Sci*2018;13:2.
- 48  
49 13. Lewin S, Bohren M, Rashidian A, et al. Applying GRADE-CERQual to qualitative evidence synthesis findings-paper 2: how to make an overall CERQual  
50  
51  
52  
53  
54  
55  
56  
57  
58  
59  
60

- assessment of confidence and create a Summary of Qualitative Findings table.  
*Implement Sci*2018;13:10.
14. Schutz AJCP. Collected Papers. Vol. 1. The Hague: Martinus Nijhoff. 1964. 1962;2.
  15. Arnaert A and Ciccotosto G. Response phases in methadone treatment for chronic nonmalignant pain. *Pain Management Nursing*2006;7:23-30.
  16. Bergman AA, Matthias MS, Coffing JM, et al. Contrasting tensions between patients and PCPs in chronic pain management: a qualitative study. *Pain Medicine*2013;14:1689-97.
  17. Blake S, Ruel B, Seamark C, et al. Experiences of patients requiring strong opioid drugs for chronic non-cancer pain: a patient-initiated study. *British Journal of General Practice*2007;57:101-8.
  18. Brooks EA, Unruh A and Lynch ME. Exploring the lived experience of adults using prescription opioids to manage chronic noncancer pain. *Pain Research & Management*2015;20:15-22.
  19. Buchbinder M, Wilbur R, McLean S, et al. "Is there any way I can get something for my pain?" Patient strategies for requesting analgesics. *Patient Education and Counseling*2015;98:137-43.
  20. Chang Y-P, Wray LO, Sessanna L, et al. Use of prescription opioid medication among community-dwelling older adults with noncancer chronic pain. *Journal of Addictions Nursing (Taylor & Francis Ltd)*2011;22:19-24.
  21. Chang F and Ibrahim S. Perceptions of community-dwelling patients and their physicians on OxyContin ® discontinuation and the impact on chronic pain management. *Pain Research & Management*2017;2017:11.
  22. Coyne KS, Currie BM, Holmes WC, et al. Assessment of a Stool Symptom Screener and Understanding the Opioid-Induced Constipation Symptom Experience. *Patient*2015;8:317-27.
  23. Esquibel AY and Borkan J. Doctors and patients in pain: Conflict and collaboration in opioid prescription in primary care. *Pain*2014;155:2575-82.
  24. Frank JW, Levy C, Matlock DD, et al. Patients' Perspectives on Tapering of Chronic Opioid Therapy: A Qualitative Study. *Pain Medicine*2016;17:1838-47.
  25. Green TC, Case P, Fiske H, et al. Perpetuating stigma or reducing risk ? Perspectives from naloxone consumers and pharmacists on pharmacy-based naloxone in 2 states. *Journal of the American Pharmacists Association*2017;57:S19-+.
  26. Hooten WM, Vickers KS, Shi Y, et al. Smoking cessation and chronic pain: patient and pain medicine physician attitudes. *Pain Practice*2011;11:552-63.
  27. Krebs EE, Bergman AA, Coffing JM, et al. Barriers to guideline-concordant opioid management in primary care-a qualitative study. *Journal of Pain*2014;15:1148-55.
  28. Matthias MS, Krebs EE, Bergman AA, et al. Communicating about opioids for chronic pain: A qualitative study of patient attributions and the influence of the patient-physician relationship. *European Journal of Pain*2014;18:835-43.
  29. McCrorie C, Closs SJ, House A, et al. Understanding long-term opioid prescribing for non-cancer pain in primary care: a qualitative study. *BMC Family Practice*2015;16:121.
  30. Mueller SR, Koester S, Glanz JM, et al. Attitudes Toward Naloxone Prescribing in Clinical Settings: A Qualitative Study of Patients Prescribed High Dose Opioids for Chronic Non-Cancer Pain. *Journal of General Internal Medicine*2017;32:277-83.

- 1
- 2
- 3
- 4 31. Paterson C, Ledgerwood K, Arnold C, et al. Resisting Prescribed Opioids: A
- 5 Qualitative Study of Decision Making in Patients Taking Opioids for Chronic
- 6 Noncancer Pain. *Pain Medicine*2016;17:717-27.
- 7 32. Penney LS, Ritenbaugh C, DeBar LL, et al. Provider and patient perspectives
- 8 on opioids and alternative treatments for managing chronic pain: a qualitative study.
- 9 *BMC Family Practice*2017;17.
- 10 33. Rieb LM, Norman WV, Martin RE, et al. Withdrawal-associated injury site
- 11 pain (WISP): A descriptive case series of an opioid cessation phenomenon.
- 12 *Pain*2016;157:2865-74.
- 13 34. Simmonds MJ, Finley EP, Vale S, et al. A qualitative study of veterans on
- 14 long-term opioid analgesics: barriers and facilitators to multimodality pain
- 15 management. *Pain Medicine*2015;16:726-32.
- 16 35. St Marie B. Primary care experiences of people who live with chronic pain
- 17 and receive opioids to manage pain: A qualitative methodology. *Journal of the*
- 18 *American Association of Nurse Practitioners*2016;28:429-35.
- 19 36. Vallerand A and Nowak L. Chronic Opioid Therapy for Nonmalignant Pain:
- 20 The Patient's Perspective. Part I--Life Before and After Opioid Therapy. *Pain*
- 21 *Management Nursing*2009;10:165-72.
- 22 37. Vallerand A and Nowak L. Chronic opioid therapy for nonmalignant pain: the
- 23 patient's perspective. Part II--Barriers to chronic opioid therapy. *Pain Management*
- 24 *Nursing*2010;11:126-31.
- 25 38. Wallace LS, Wexler RK, McDougale L, et al. Voices that may not otherwise be
- 26 heard: A qualitative exploration into the perspectives of primary care patients living
- 27 with chronic pain. *Journal of Pain Research*2014;7:291-99.
- 28 39. Warms CA, Marshall HM, Hoffman AJ, et al. There are a few things you did
- 29 not ask about my pain: writing on the margins of a survey questionnaire.
- 30 *Rehabilitation Nursing*2005;30:248-56.
- 31 40. Zgierska AE, Burzinski CA, Cox J, et al. Mindfulness Meditation-Based
- 32 Intervention Is Feasible, Acceptable, and Safe for Chronic Low Back Pain Requiring
- 33 Long-Term Daily Opioid Therapy. *Journal of Alternative & Complementary*
- 34 *Medicine*2016;22:610-20.
- 35 41. Zheng Z, Paterson C, Ledgerwood K, et al. Chaos to hope: a narrative of
- 36 healing. *Pain Medicine*2013;14:1826-38.
- 37 42. Al Achkar M, Revere D, Dennis B, et al. Exploring perceptions and
- 38 experiences of patients who have chronic pain as state prescription opioid policies
- 39 change: a qualitative study in Indiana. *BMJ open*2017;7:e015083.
- 40 43. Matthias MS, Johnson NL, Shields CG, et al. "I'm Not Gonna Pull the Rug out
- 41 From Under You": Patient-Provider Communication About Opioid Tapering. *Journal*
- 42 *of Pain*2017;18:1365-73.
- 43 44. Matthias MS, Donaldson MT, Jensen AC, et al. "I Was a Little Surprised":
- 44 Qualitative Insights From Patients Enrolled in a 12-Month Trial Comparing Opioids
- 45 With Nonopioid Medications for Chronic Musculoskeletal Pain. *Journal of*
- 46 *Pain*2018;19:1082-90.
- 47 45. Smith CL, Severtsen B, Vandermause R, et al. Seeking Chronic Pain Relief: A
- 48 Hermeneutic Exploration. *Pain Management Nursing*2018.
- 49 46. Toye F, Seers K, Tierney S, et al. A qualitative evidence synthesis to explore
- 50 healthcare professionals' experience of prescribing opioids to adults with chronic non-
- 51 malignant pain. *BMC Fam Pract*2017;18:94.
- 52 47. CDC. CDC Guideline for Prescribing Opioids for Chronic Pain: (2019,
- 53 accessed 12-4-19).
- 54
- 55
- 56
- 57
- 58
- 59
- 60

1  
2  
3  
4  
5  
6  
7  
8  
9  
10  
11  
12  
13  
14  
15  
16  
17  
18  
19  
20  
21  
22  
23  
24  
25  
26  
27  
28  
29  
30  
31  
32  
33  
34  
35  
36  
37  
38  
39  
40  
41  
42  
43  
44  
45  
46  
47  
48  
49  
50  
51  
52  
53  
54  
55  
56  
57  
58  
59  
60

For peer review only



Figure 1 Concept model of the experiences of people taking opioid medication for chronic non-malignant pain

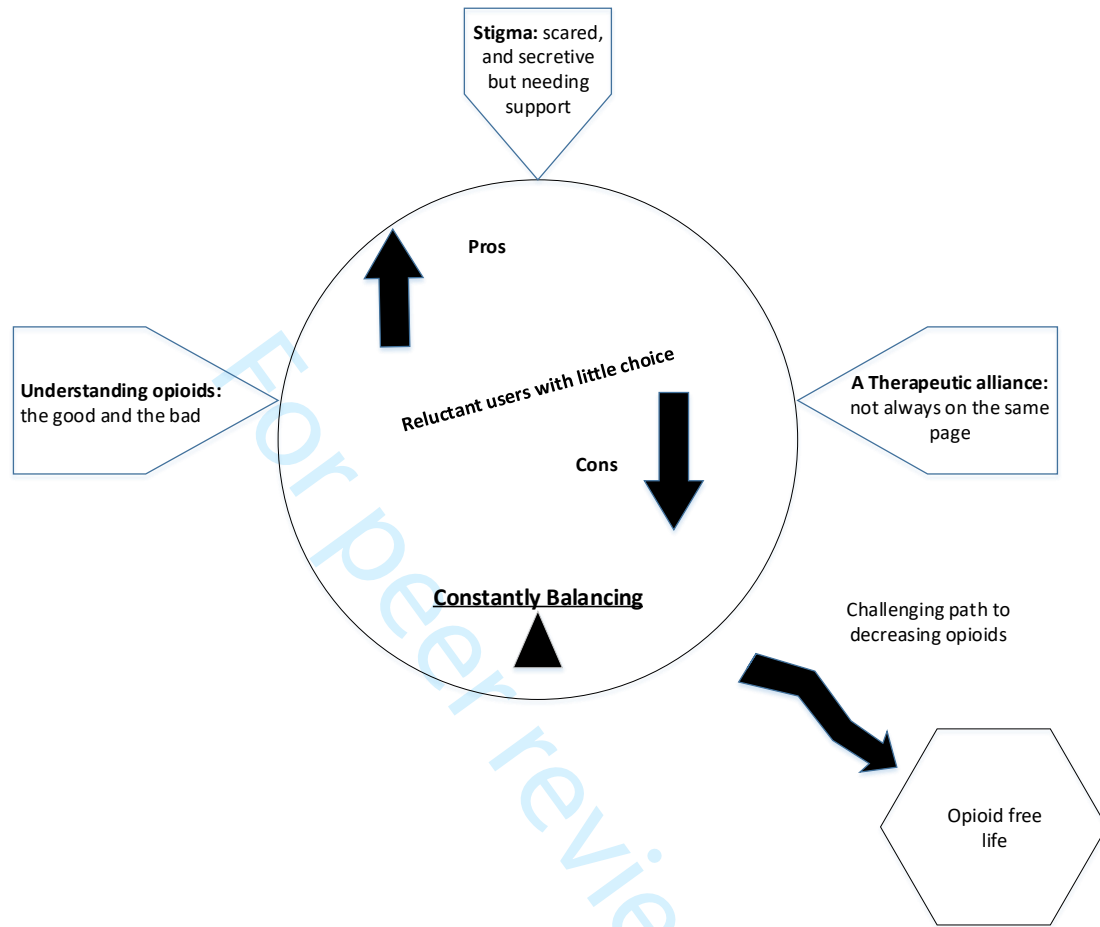

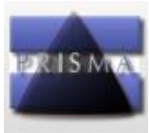

**Figure 2: PRISMA Flow Diagram**

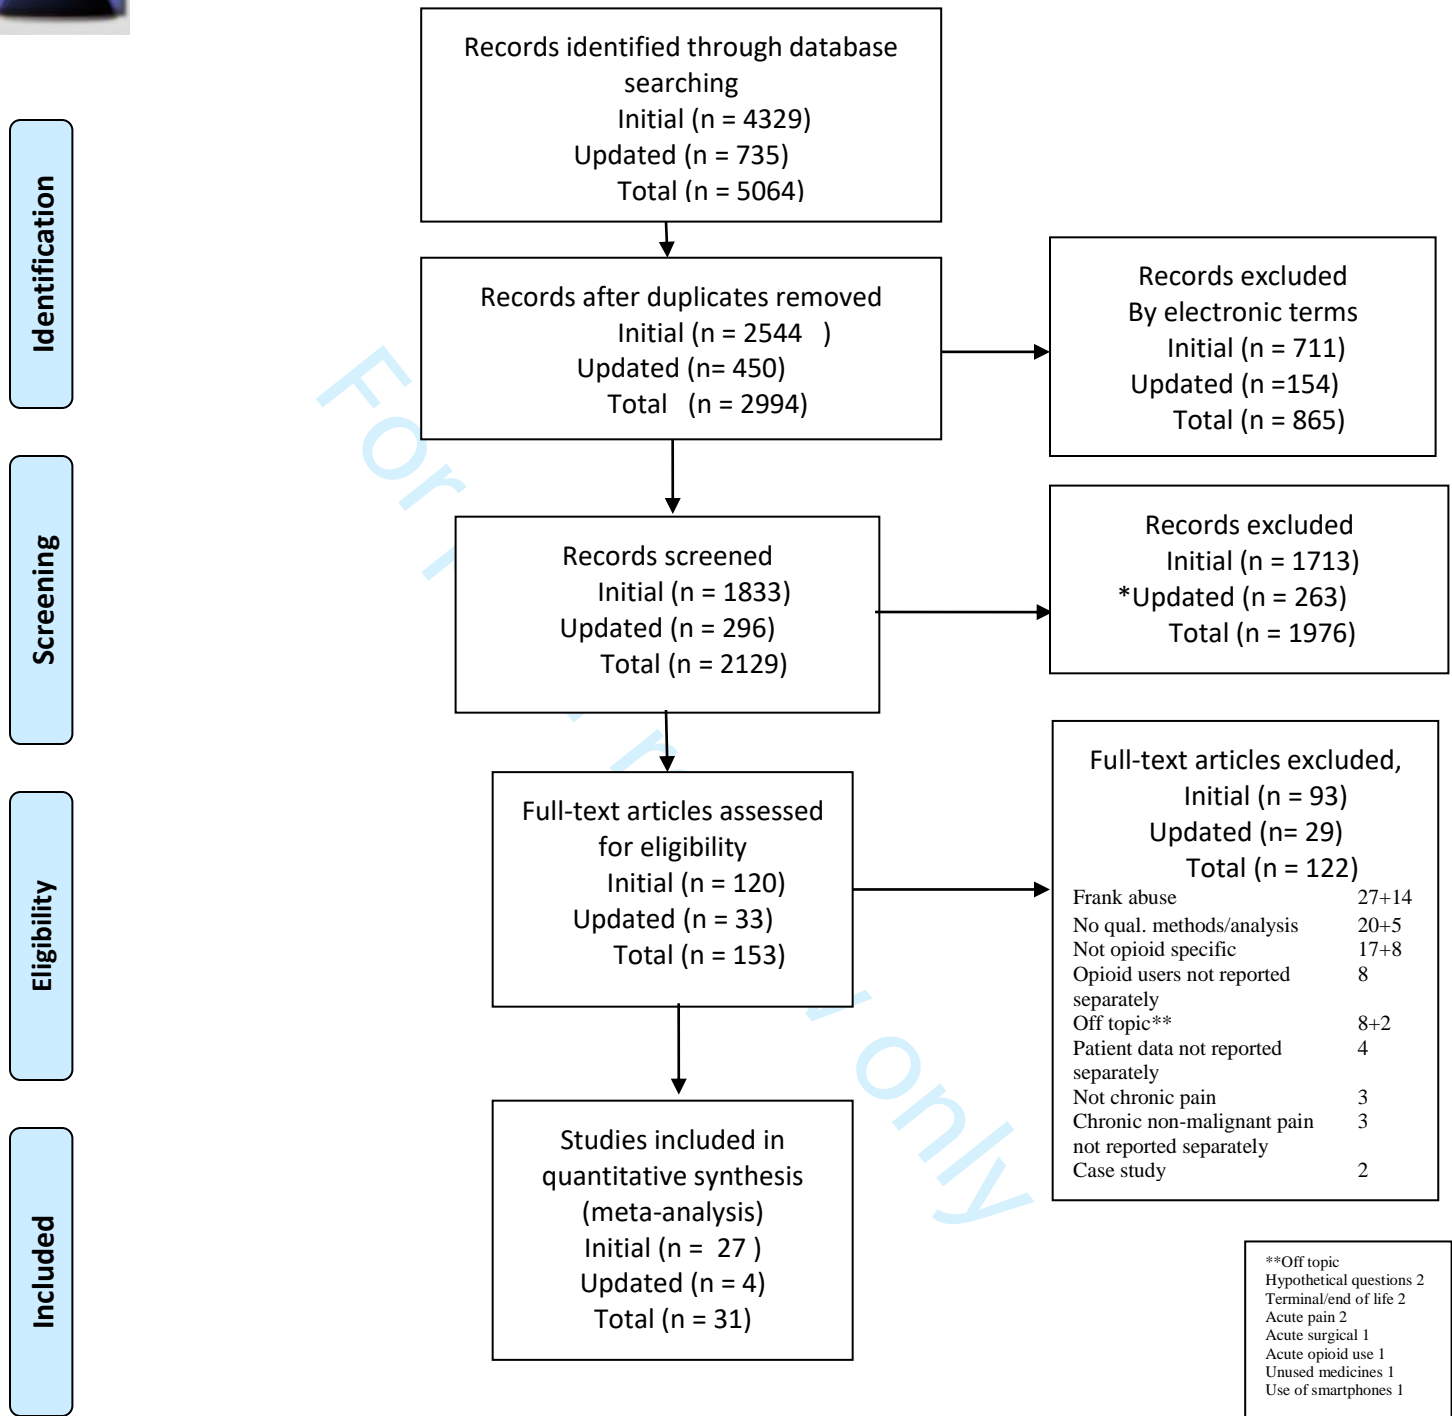

**Initial search June 2017 and updated search Sept 2018 reported.**

The search dates for the rerun could be specified in some databases, but not all. Therefore some papers were found in both searches. These twice found duplicate papers were removed at this point\*

From: Moher D, Liberati A, Tetzlaff J, Altman DG, The PRISMA Group (2009). Preferred Reporting Items for Systematic Reviews and Meta-Analyses: The PRISMA Statement. PLoS Med 6(7): e1000097. doi:10.1371/journal.pmed1000097

## Appendix 1 The eMERGe meta-ethnography reporting guidance

| <b>Numbered criteria headings with explanatory reporting criteria</b>                                                                                                                                                                                                                                                                                                                  | <b>Page</b> |
|----------------------------------------------------------------------------------------------------------------------------------------------------------------------------------------------------------------------------------------------------------------------------------------------------------------------------------------------------------------------------------------|-------------|
| <b>Phase 1—Selecting meta-ethnography and getting started</b>                                                                                                                                                                                                                                                                                                                          |             |
| <i>Introduction</i>                                                                                                                                                                                                                                                                                                                                                                    |             |
| 1 Rationale and context for the meta-ethnography<br>Describe the gap in research or knowledge to be filled by the meta-ethnography, and the wider context of the meta-ethnography                                                                                                                                                                                                      | 4           |
| 2 Aim(s) of the meta-ethnography<br>Describe the meta-ethnography aim(s)                                                                                                                                                                                                                                                                                                               | 4           |
| 3 Focus of the meta-ethnography<br>Describe the meta-ethnography review question(s) (or objectives)                                                                                                                                                                                                                                                                                    | 4           |
| 4 Rationale for using meta-ethnography<br>Explain why meta-ethnography was considered the most appropriate qualitative synthesis methodology                                                                                                                                                                                                                                           | 4           |
| <b>Phase 2—Deciding what is relevant</b>                                                                                                                                                                                                                                                                                                                                               |             |
| <i>Methods</i>                                                                                                                                                                                                                                                                                                                                                                         |             |
| 5 Search strategy<br>Describe the rationale for the literature search strategy                                                                                                                                                                                                                                                                                                         | 4/5         |
| 6 Search processes<br>Describe how the literature searching was carried out and by whom                                                                                                                                                                                                                                                                                                | 4/5         |
| 7 Selecting primary studies<br>Describe the process of study screening and selection, and who was involved                                                                                                                                                                                                                                                                             | 5           |
| <i>Findings</i>                                                                                                                                                                                                                                                                                                                                                                        |             |
| 8 Outcome of study selection<br>Describe the results of study searches and screening                                                                                                                                                                                                                                                                                                   | 16          |
| <b>Phase 3—Reading included studies</b>                                                                                                                                                                                                                                                                                                                                                |             |
| <i>Methods</i>                                                                                                                                                                                                                                                                                                                                                                         |             |
| 9 Reading and data extraction approach<br>Describe the reading and data extraction method and processes                                                                                                                                                                                                                                                                                | 6           |
| <i>Findings</i>                                                                                                                                                                                                                                                                                                                                                                        |             |
| 10 Presenting characteristics of included studies<br>Describe characteristics of the included studies                                                                                                                                                                                                                                                                                  | Table 1     |
| <b>Phase 4—Determining how studies are related</b>                                                                                                                                                                                                                                                                                                                                     |             |
| <i>Methods</i>                                                                                                                                                                                                                                                                                                                                                                         |             |
| 11 Process for determining how studies are related<br>Describe the methods and processes for determining how the included studies are related: - Which aspects of studies were compared AND- How the studies were compared                                                                                                                                                             | 6           |
| <i>Findings</i>                                                                                                                                                                                                                                                                                                                                                                        |             |
| 12 Outcome of relating studies<br>Describe how studies relate to each other                                                                                                                                                                                                                                                                                                            | 17          |
| <b>Phase 5—Translating studies into one another</b>                                                                                                                                                                                                                                                                                                                                    | 16          |
| <i>Methods</i>                                                                                                                                                                                                                                                                                                                                                                         |             |
| 13 Process of translating studies<br>Describe the methods of translation: - Describe steps taken to preserve the context and meaning of the relationships between concepts within and across studies- Describe how the reciprocal and refutational translations were conducted- Describe how potential alternative interpretations or explanations were considered in the translations | 16          |
| <i>Findings</i>                                                                                                                                                                                                                                                                                                                                                                        |             |
| 14 Outcome of translation<br>Describe the interpretive findings of the translation.                                                                                                                                                                                                                                                                                                    | 17 to 28    |
| <b>Phase 6—Synthesizing translations</b>                                                                                                                                                                                                                                                                                                                                               |             |
| <i>Methods</i>                                                                                                                                                                                                                                                                                                                                                                         |             |
| 15 Synthesis process<br>Describe the methods used to develop overarching concepts (“synthesised translations”)Describe how potential alternative interpretations or explanations were considered in the synthesis                                                                                                                                                                      | 16          |
| <i>Findings</i>                                                                                                                                                                                                                                                                                                                                                                        |             |
| 16 Outcome of synthesis process<br>Describe the new theory, conceptual framework, model, configuration, or interpretation of data developed from the synthesis                                                                                                                                                                                                                         | Figure 1    |
| <b>Phase 7—Expressing the synthesis</b>                                                                                                                                                                                                                                                                                                                                                |             |

|                                                                                                                                                                                                                                                                                                                                                                                                        |             |
|--------------------------------------------------------------------------------------------------------------------------------------------------------------------------------------------------------------------------------------------------------------------------------------------------------------------------------------------------------------------------------------------------------|-------------|
| <p><i>Discussion</i></p> <p>17 Summary of findings<br/>Summarize the main interpretive findings of the translation and synthesis and compare them to existing literature</p>                                                                                                                                                                                                                           | 28 to<br>30 |
| <p>18 Strengths, limitations, and reflexivity<br/>Reflect on and describe the strengths and limitations of the synthesis:<br/>- Methodological aspects—for example, describe how the synthesis Findings were influenced by the nature of the included studies and how the meta-ethnography was conducted.<br/>- Reflexivity—for example, the impact of the research team on the synthesis findings</p> | 30          |
| <p>19 Recommendations and conclusions<br/>Describe the implications of the Synthesis</p>                                                                                                                                                                                                                                                                                                               | 31          |

Reference: France et al. BMC Medical Research Methodology (2019) 19:25  
<https://doi.org/10.1186/s12874-018-0600-0>

For peer review only

## Appendix 2 – example of search terms

Scopus

((TITLE-ABS-KEY(buprenorphine or fentanyl or heroin or hydromorphone or methadone or morphine or opium or oxycodone or pentazocine or tramadol or opiate\* or opioid\*) OR TITLE-ABS-KEY(suboxone or bunavail or zubsolv or dipipanone or diconal or wellconal or diamorphine or duragesic or fentora or actiq or abstral or recivit or effentora or instanyl or pecfent or oxycontin or roxicodone or oramorph or papaveretum or omnopon or fortral )OR TITLE-ABS-KEY(osegon or "talwin nx" or pethidine or meperidine or demerol or tapentadol or nucynta or palexia or tapal or ultram or zytram))) and ((TITLE-ABS-KEY(qualitative w/5 (theor\* or study or studies or research or analysis)) OR TITLE-ABS-KEY(ethno\* or emic or etic or phenomenolog\* or hermeneutic\* or heidegger\* or husserl\* or colaizzi\* or giorgi\* or glaser or strauss or (van and kaam\*) or (van and manen) or ricoeur or spiegelberg\* or merleau) OR TITLE-ABS-KEY(constant w/3 compar\*) OR TITLE-ABS-KEY(focus w/3 group\*) OR TITLE-ABS-KEY( grounded w/3 (theor\* or study or studies or research or analysis)) OR TITLE-ABS-KEY(narrative w/3 analysis) OR TITLE-ABS-KEY(discourse w/3 analysis) OR TITLE-ABS-KEY( (lived or life) w/3 experience\*) OR TITLE-ABS-KEY((theoretical or purposive) w/3 sampl\*) OR TITLE-ABS-KEY("field note\*" or "field record\*" or fieldnote\*) OR TITLE-ABS-KEY(participant\* w/3 observ\*) OR TITLE-ABS-KEY("action research") OR TITLE-ABS-KEY("digital adj record\*" or audiorecord\* or taperecord\* or videorecord\* or videotap\* ) OR TITLE-ABS-KEY(cooperative and inquir\*) OR TITLE-ABS-KEY(co and operative and inquir\*) OR TITLE-ABS-KEY(co-operative and inquir\*) OR TITLE-ABS-KEY( ("semi-structured" or semistructured or unstructured or structured) w/3 interview\*) OR TITLE-ABS-KEY((Informal or in-depth or indepth or "in depth") w/3 interview\*) OR TITLE-ABS-KEY(("face-to-face" or "face to face") w/3 interview\*) OR TITLE-ABS-KEY("ipa" or "interpretive phenomenological analysis") OR TITLE-ABS-KEY(social and construct\*) OR TITLE-ABS-KEY("appreciative inquiry") OR TITLE-ABS-KEY(poststructural\* or "post structural\*" or post-structural\*) OR TITLE-ABS-KEY( postmodern\* or "post modern\*" or post-modern\*) OR TITLE-ABS-KEY(feminis\*) OR TITLE-ABS-KEY(humanistic or existential or experiential))) and (TITLE-ABS-KEY(pain))

1  
2  
3  
4  
5  
6  
7  
8  
9  
10  
11  
12  
13  
14  
15  
16  
17  
18  
19  
20  
21  
22  
23  
24  
25  
26  
27  
28  
29  
30  
31  
32  
33  
34  
35  
36  
37  
38  
39  
40  
41  
42  
43  
44  
45  
46  
47  
48  
49  
50  
51  
52  
53  
54  
55  
56  
57  
58  
59  
60

For peer review only

## Appendix 2 Critical Appraisal Skills Programme (CASP) Quality appraisal tool scores

| Study            | Q1  | Q2  | Q3  | Q4  | Q5  | Q6  | Q7  | Q8  | Q9  | Q10 | Score |
|------------------|-----|-----|-----|-----|-----|-----|-----|-----|-----|-----|-------|
| Arnaert 2006     | Yes | Yes | Yes | Yes | ?   | No  | Yes | Yes | Yes | Yes | 17/20 |
| Bennett 2013     | Yes | Yes | Yes | Yes | Yes | No  | Yes | ?   | Yes | Yes | 17/20 |
| Bergman 2013     | Yes | Yes | Yes | Yes | Yes | No  | Yes | ?   | Yes | Yes | 17/20 |
| Blake 2007       | Yes | Yes | Yes | Yes | Yes | ?   | Yes | Yes | Yes | Yes | 19/20 |
| Brooks 2015      | Yes | Yes | Yes | Yes | Yes | No  | Yes | ?   | Yes | Yes | 17/20 |
| Buchbinder 2015  | Yes | Yes | Yes | Yes | Yes | No  | Yes | Yes | Yes | Yes | 18/20 |
| Chang F 2017     | Yes | Yes | Yes | Yes | Yes | No  | ?   | ?   | Yes | Yes | 16/20 |
| Chang Y-P 2011   | Yes | Yes | Yes | Yes | Yes | No  | Yes | ?   | ?   | Yes | 16/20 |
| Coyne 2015       | Yes | Yes | Yes | Yes | Yes | No  | Yes | ?   | Yes | Yes | 17/20 |
| Esquibel 2012    | Yes | Yes | Yes | Yes | Yes | Yes | Yes | Yes | Yes | Yes | 20/20 |
| Frank 2016       | Yes | Yes | Yes | Yes | Yes | Yes | Yes | Yes | Yes | Yes | 20/20 |
| Green 2017       | Yes | Yes | Yes | Yes | Yes | No  | Yes | Yes | Yes | Yes | 18/20 |
| Hooten 2011      | Yes | Yes | Yes | Yes | Yes | No  | Yes | Yes | Yes | Yes | 18/20 |
| Krebs 2014       | Yes | Yes | Yes | Yes | Yes | ?   | Yes | Yes | Yes | Yes | 19/20 |
| Lewis 2014       | Yes | Yes | Yes | ?   | Yes | ?   | Yes | Yes | Yes | Yes | 18/20 |
| Matthias 2013    | Yes | Yes | Yes | Yes | Yes | No  | Yes | Yes | Yes | Yes | 18/20 |
| McCrorie         | Yes | Yes | ?   | Yes | Yes | No  | Yes | Yes | Yes | Yes | 17/20 |
| Mueller          | Yes | Yes | Yes | Yes | ?   | No  | Yes | Yes | ?   | Yes | 16/20 |
| Paterson 2016    | Yes | Yes | Yes | Yes | Yes | ?   | ?   | Yes | Yes | Yes | 18/20 |
| Penney 2016      | Yes | Yes | ?   | ?   | ?   | ?   | Yes | ?   | ?   | ?   | 13/20 |
| Rieb 2016        | Yes | Yes | Yes | Yes | Yes | ?   | Yes | ?   | Yes | Yes | 18/20 |
| Simmonds 2015    | Yes | Yes | ?   | Yes | Yes | ?   | Yes | Yes | ?   | ?   | 16/20 |
| St Marie 2016    | Yes | Yes | Yes | Yes | Yes | ?   | Yes | Yes | Yes | Yes | 19/20 |
| Vallerand 1 2009 | Yes | Yes | Yes | Yes | Yes | No  | No  | Yes | ?   | Yes | 15/20 |
| Vallerand 2 2010 | Yes | Yes | Yes | ?   | Yes | No  | No  | Yes | ?   | ?   | 13/20 |
| Wallace 2014     | Yes | Yes | Yes | Yes | Yes | No  | Yes | ?   | ?   | Yes | 16/20 |
| Warms 2005       | Yes | Yes | Yes | Yes | Yes | No  | No  | Yes | Yes | Yes | 16/20 |
| Zgierska 2016    | Yes | Yes | Yes | Yes | Yes | No  | Yes | Yes | Yes | Yes | 18/20 |
| Zheng 2013       | Yes | Yes | Yes | Yes | Yes | No  | ?   | Yes | Yes | Yes | 17/20 |
| Al Achkar 2017   | Yes | Yes | Yes | Yes | Yes | No  | Yes | Yes | Yes | Yes | 18/20 |
| Matthias 2017    | Yes | Yes | Yes | Yes | Yes | No  | Yes | Yes | Yes | Yes | 18/20 |
| Matthias 2018    | Yes | Yes | Yes | Yes | Yes | ?   | Yes | Yes | Yes | Yes | 19/20 |
| Smith 2018       | Yes | Yes | Yes | Yes | Yes | Yes | Yes | Yes | Yes | Yes | 20/20 |

**Legend 1 Critical Appraisal Skills Programme (CASP) questions scoring: Yes =2 ? (Can't Tell) = 1 No = 0**

Q1. Was there a clear statement of the aims of the research?

Q2. Is a qualitative methodology appropriate?

Q3. Was the research design appropriate to the aims of the research?

Q4. Was the recruitment strategy appropriate to the aims of the research?

Q5. Was the data collected in a way that addressed the research issue?

Q6. Has the relationship between researcher and participants been adequately considered?

Q7. Have ethical issues been taken into consideration?

Q8. Was the data analysis sufficiently rigorous?

Q9. Is there a clear statement of findings?

Q10. How valuable is the research?

# BMJ Open

## A systematic review and qualitative evidence synthesis of the experiences of people taking opioid medication for chronic non-malignant pain: a meta-ethnography

|                                 |                                                                                                                                                                                                                                                                                                                                                                                                                                                                                                                                                                                                |
|---------------------------------|------------------------------------------------------------------------------------------------------------------------------------------------------------------------------------------------------------------------------------------------------------------------------------------------------------------------------------------------------------------------------------------------------------------------------------------------------------------------------------------------------------------------------------------------------------------------------------------------|
| Journal:                        | <i>BMJ Open</i>                                                                                                                                                                                                                                                                                                                                                                                                                                                                                                                                                                                |
| Manuscript ID                   | bmjopen-2019-032988.R1                                                                                                                                                                                                                                                                                                                                                                                                                                                                                                                                                                         |
| Article Type:                   | Original research                                                                                                                                                                                                                                                                                                                                                                                                                                                                                                                                                                              |
| Date Submitted by the Author:   | 29-Oct-2019                                                                                                                                                                                                                                                                                                                                                                                                                                                                                                                                                                                    |
| Complete List of Authors:       | Nichols, Vivien; University of Warwick, Warwick Clinical Trials Unit, Warwick Medical School<br>Toye, Francine; Oxford University Hospitals NHS Trust, Physiotherapy Research Unit, Nuffield Orthopaedic Centre<br>Eldabe, Sam; The James Cook University Hospital<br>Sandhu, Harbinder; University of Warwick, Warwick Clinical Trials Unit, Warwick Medical School<br>Underwood, Martin; University of Warwick, Warwick Clinical Trials Unit, Warwick Medical School<br>Seers, Kate; University of Warwick, Warwick Research in Nursing, Division of Health Sciences, Warwick Medical School |
| <b>Primary Subject Heading</b>: | Qualitative research                                                                                                                                                                                                                                                                                                                                                                                                                                                                                                                                                                           |
| Secondary Subject Heading:      | Patient-centred medicine                                                                                                                                                                                                                                                                                                                                                                                                                                                                                                                                                                       |
| Keywords:                       | opioid, patients' views, QUALITATIVE RESEARCH, chronic non-malignant pain, meta-ethnography, qualitative evidence synthesis                                                                                                                                                                                                                                                                                                                                                                                                                                                                    |
|                                 |                                                                                                                                                                                                                                                                                                                                                                                                                                                                                                                                                                                                |

SCHOLARONE™  
Manuscripts





I, the Submitting Author has the right to grant and does grant on behalf of all authors of the Work (as defined in the below author licence), an exclusive licence and/or a non-exclusive licence for contributions from authors who are: i) UK Crown employees; ii) where BMJ has agreed a CC-BY licence shall apply, and/or iii) in accordance with the terms applicable for US Federal Government officers or employees acting as part of their official duties; on a worldwide, perpetual, irrevocable, royalty-free basis to BMJ Publishing Group Ltd ("BMJ") its licensees and where the relevant Journal is co-owned by BMJ to the co-owners of the Journal, to publish the Work in this journal and any other BMJ products and to exploit all rights, as set out in our [licence](#).

The Submitting Author accepts and understands that any supply made under these terms is made by BMJ to the Submitting Author unless you are acting as an employee on behalf of your employer or a postgraduate student of an affiliated institution which is paying any applicable article publishing charge ("APC") for Open Access articles. Where the Submitting Author wishes to make the Work available on an Open Access basis (and intends to pay the relevant APC), the terms of reuse of such Open Access shall be governed by a Creative Commons licence – details of these licences and which [Creative Commons](#) licence will apply to this Work are set out in our licence referred to above.

Other than as permitted in any relevant BMJ Author's Self Archiving Policies, I confirm this Work has not been accepted for publication elsewhere, is not being considered for publication elsewhere and does not duplicate material already published. I confirm all authors consent to publication of this Work and authorise the granting of this licence.

1  
2  
3  
4  
5  
6  
7  
8  
9  
10  
11  
12  
13  
14  
15  
16  
17  
18  
19  
20  
21  
22  
23  
24  
25  
26  
27  
28  
29  
30  
31  
32  
33  
34  
35  
36  
37  
38  
39  
40  
41  
42  
43  
44  
45  
46  
47  
48  
49  
50  
51  
52  
53  
54  
55  
56  
57  
58  
59  
60

# A systematic review and qualitative evidence synthesis of the experiences of people taking opioid medication for chronic non-malignant pain: a meta-ethnography

Mrs Vivien Nichols (1) Dr Francine Toyne (2) Professor Sam Eldabe (3) Dr Harbinder Sandhu (1) Professor Martin Underwood (1,) and Professor Kate Seers (4)

(1) Warwick Clinical Trials Unit  
Warwick Medical School  
University of Warwick, UK

(2) Physiotherapy Research Unit, Nuffield Orthopaedic Centre,  
Oxford University Hospitals NHS Foundation Trust  
Oxford, UK

(3) Academic Pain Department  
The James Cook University Hospital  
Middlesbrough, UK

(4) Warwick Research in Nursing  
Warwick Medical School  
University of Warwick, UK

Corresponding author:  
Mrs Vivien Nichols  
Warwick Clinical Trials Unit,  
Warwick Medical School,  
University of Warwick  
Coventry CV4 7AL  
Tel: 02476574652  
Email: [V.P.Nichols@warwick.ac.uk](mailto:V.P.Nichols@warwick.ac.uk)

## Abstract

*Objective* To review qualitative studies of the experience of taking opioid medication for Chronic Non-Malignant Pain (CNMP) or coming off them.

*Design* A qualitative evidence synthesis using meta-ethnography. We used a seven step approach from the methods of meta-ethnography.

*Data sources and eligibility criteria* We searched selected databases for qualitative studies which gave patients' views of taking opioid medication for CNMP or of coming off them.

*Data extraction and synthesis* Papers were quality appraised using a Critical Appraisal Skills Programme (CASP) tool and Grading of Recommendations Assessment, Development and Evaluation working group - Confidence in Evidence from Reviews of Qualitative research) (GRADE-CERQual) guidelines were applied. We identified concepts and iteratively abstracted these concepts into a line of argument.

*Results* We screened 2129 unique citations, checked 153 full texts and 31 met our review criteria. We identified five themes: 1) Reluctant users with little choice; 2) Understanding opioids: the good and the bad; 3) A therapeutic alliance: not always on the same page; 4) Stigma: feeling scared and secretive but needing support; and 5) The challenge of tapering or withdrawal. A new overarching theme of 'constantly balancing' emerged from the data.

*Conclusions* People taking opioids are constantly balancing tensions, not always wanting to take opioids, but feeling they have no choice because of the pain. They frequently feel judged, were not always 'on the same page' as their health care professional and changes in opioid use were often challenging.

1  
2  
3  
4 **Key words:** Opioid, patients' views, qualitative research, chronic non-malignant  
5  
6  
7 pain, meta-ethnography, qualitative evidence synthesis.  
8

9 Word count 4,940  
10  
11  
12  
13  
14

## 15 **Strengths and Limitations**

- 16  
17  
18 • To our knowledge this is the first qualitative evidence synthesis of patients'  
19 experiences of taking opioid medications.  
20  
21
- 22  
23 • Meta-ethnography provides a thorough, systematic way of synthesising  
24 qualitative findings across multiple studies and gives the reviewer's  
25 interpretation of the data.  
26  
27
- 28  
29 • Using a GRADE-CERQual approach can assist in rating confidence in the  
30 review findings.  
31  
32
- 33  
34 • Qualitative research that illuminates patients' perspectives can help to shape  
35 future approaches to opioid management.  
36  
37  
38  
39

## 40 **Introduction**

41  
42  
43  
44  
45 Chronic non-malignant pain (CNMP) affects between an estimated 11% and 20% of  
46 the population in Europe and US and can impact heavily on people's quality of life <sup>1, 2</sup>  
47 . Opioid medications are strong painkillers which have a well-established role in the  
48 treatment of acute and cancer pain; they have also been advocated for CNMP. Opioids  
49 can have distressing side effects as dosages increase such as; constipation, sedation,  
50 drowsiness, nausea, decreased concentration and memory, or mood changes <sup>3</sup>. Most  
51 people who use opioids develop tolerance to the painkilling effect of opioids, and  
52  
53  
54  
55  
56  
57  
58  
59  
60

1  
2  
3 some become dependent on them. Studies have shown that high opioid usage can also  
4 put people's lives at risk<sup>4</sup>. Despite this, the prescription of opioid medication for  
5 CNMP has risen sharply in the higher income countries. Few studies of opioids have  
6 shown effectiveness beyond 12 weeks follow up. Population surveys have shown  
7 long-term use to be associated with increased side effects and limited pain relief<sup>3 5 6</sup>.  
8 This synthesis of qualitative research was undertaken to underpin a process evaluation  
9 for the Improving the Wellbeing of people with Opioid Treated CHronic pain (I-  
10 WOTCH) study funded by the National Institute for Health Research. I-WOTCH is a  
11 randomised controlled trial evaluating a multi-component education and patient  
12 centred group intervention with a one-to-one tapering programme against a control of  
13 an advice booklet with a relaxation CD. More information can be found in the main  
14 study protocol<sup>7</sup> and process evaluation protocol<sup>8</sup>.

15 This qualitative evidence synthesis uses the methods of meta-ethnography to find out  
16 what peoples' experiences are of both using opioids for CNMP and their attempts to  
17 stop taking them.

## 18 **Methods**

19 We use Noblit and Hare's 7 stages of meta-ethnographic analysis<sup>9</sup>. We used the new  
20 eMERGe reporting guidelines for meta-ethnography to structure our report<sup>10</sup> (*See*  
21 *appendix 1*). The protocol is published in the international prospective register of  
22 systematic reviews (PROSPERO) registration number: CRD42017082418.

23 <http://www.crd.york.ac.uk/PROSPERO>

### 24 *Step 1 Getting Started.*

25 In order to address what has been labelled an opioid epidemic<sup>11</sup>, we need to  
26 understand people's experiences of being on opioids and of coming off them. Our  
27  
28  
29  
30  
31  
32  
33  
34  
35  
36  
37  
38  
39  
40  
41  
42  
43  
44  
45  
46  
47  
48  
49  
50  
51  
52  
53  
54  
55  
56  
57  
58  
59  
60

1  
2  
3 team was chosen because of its expertise in primary qualitative research and  
4  
5 qualitative evidence synthesis specific to chronic pain and opioid prescription.  
6  
7

8 *Step 2 Deciding what is relevant.*

9  
10 We undertook systematic electronic searches in June 2017 with a rerun in September  
11  
12 2018, appraising relevant papers for quality using the Critical Appraisal Skills  
13  
14 Programme (CASP) tool for qualitative research <sup>12</sup>. One researcher (VN) with the  
15  
16 assistance of an academic librarian (SJ) searched seven electronic databases; Medline,  
17  
18 Embase, AMED, CINAHL, PsycInfo Web of Science and Scopus (Science citation  
19  
20 index and Social Science Citation Index) and forward citation searches. We used  
21  
22 search terms, free text and MeSH terms for all opioid drugs as well as their generic  
23  
24 names. We combined these with the MeSH term ‘pain’ and a wide range of MeSH  
25  
26 terms and words to describe all types of qualitative research and its analysis based  
27  
28 upon a search used by Toye, Seers and Barker in 2017 <sup>13</sup>. The search was limited to  
29  
30 those in English regarding humans with no cut-off date. Appendix 2 shows an  
31  
32 example of our search terms.  
33  
34  
35  
36

37 Unique citations were screened independently by 2 researchers (VN ST *see*  
38  
39 *acknowledgements*) against our inclusion and exclusion criteria (see Box 1). Any  
40  
41 disagreements were arbitrated by a third researcher (KS). Papers for full text reading  
42  
43 were identified and read by two researchers. Quality was assessed using a CASP tool.  
44  
45 VN critically appraised the studies and KS independently appraised 10% for  
46  
47 consistency. The CASP scores are shown in table 1 and appendix 3. The GRADE-  
48  
49 CERQual was used to appraise the reviewers’ confidence in the research findings <sup>14</sup>.  
50  
51  
52  
53  
54  
55  
56  
57  
58  
59  
60

*Box 1 Inclusion/Exclusion criteria*

**Included Studies**

Adults (18 years or older) taking or have taken opioid medication in the last five years

1  
2  
3  
4  
5  
6  
7  
8  
9  
10  
11  
12  
13  
14  
15  
16  
17  
18  
19  
20  
21  
22  
23  
24  
25  
26  
27  
28  
29  
30  
31  
32  
33  
34  
35  
36  
37  
38  
39  
40  
41  
42  
43  
44  
45  
46  
47  
48  
49  
50  
51  
52  
53  
54  
55  
56  
57  
58  
59  
60

|                                                                                                                                                            |
|------------------------------------------------------------------------------------------------------------------------------------------------------------|
| Published in English in peer review journals with no time constraint                                                                                       |
| Must relate to patient perspectives on using opioid medication for chronic non-malignant pain                                                              |
| Must use qualitative methodology (any analytical approach) or mixed quantitative and qualitative methodology with qualitative findings reported separately |
| Where studies include participants with differing medication we will include studies where the experience of those taking opioids is reported separately   |

**Excluded studies**

Theoretical or methodological papers  
Purely quantitative studies or mixed methods studies where the qualitative data are not presented separately  
Studies concerning active cancer  
Studies concerning headache  
Studies concerning any acute, or acute postoperative, pain  
Studies concerned only with health care professional or carer perspectives, or studies of mixed carer/ patient/ professional populations where patient perspectives are not presented separately  
Non- English language studies  
Theses or conference abstracts which are not peer reviewed

*Step 3 Reading the studies*

VN read all the studies and KS and FT read half of these papers each (so all were read twice) and all extracted the second order concepts independently. A second order concept is a researcher's interpretation of data in a primary qualitative study<sup>16</sup>. VN, KS and FT met to discuss and reach agreement, and compiled a spreadsheet of all of the concepts extracted from the papers

*Step 4 Determining how the studies are related?*

VN sorted the concepts into categories by looking for any similarities and differences across all the studies. VN, KS and FT discussed the categorisation of data on multiple occasions. To enable comparison across studies, VN recorded descriptive data about each study (see table 1)

1  
2  
3  
4  
5  
6  
7  
8  
9  
10  
11  
12  
13  
14  
15  
16  
17  
18  
19  
20  
21  
22  
23  
24  
25  
26  
27  
28  
29  
30  
31  
32  
33  
34  
35  
36  
37  
38  
39  
40  
41  
42  
43  
44  
45  
46  
47  
48  
49  
50  
51  
52  
53  
54  
55  
56  
57  
58  
59  
60

For peer review only



Table 1 Study characteristics with CASP and GRADE-CERQual relevance ratings

| Studies                                                                                                                                                 | Country | Data collection / participants                                   | Analytical Approach                      | Aims <i>Italics = verbatim quotes</i>                                                                                                                                                                                                                                                        | Morphine Equivalent Daily Dose mg/day (MED) | CASP score | Relevance |
|---------------------------------------------------------------------------------------------------------------------------------------------------------|---------|------------------------------------------------------------------|------------------------------------------|----------------------------------------------------------------------------------------------------------------------------------------------------------------------------------------------------------------------------------------------------------------------------------------------|---------------------------------------------|------------|-----------|
| <b>1 Arnaert et al 2006</b> <sup>17</sup><br>Response Phases in Methadone Treatment for Chronic Non-malignant Pain                                      | Canada  | Semi-structured interview<br>N=11<br>(4M/7F)                     | Content analysis                         | <i>"...to develop an understanding and to gain knowledge about the beliefs of patients with CNMP who were taking methadone, and to explore what challenges, if any, existed that affected their beliefs when first starting methadone treatment as an activity in their personal lives."</i> | None reported                               | 17/20      | P         |
| <b>2 Bergman et al 2013</b> <sup>18</sup><br>Contrasting Tensions Between Patients and PCPs in Chronic Pain Management: A Qualitative Study             | USA     | In-depth interviews<br>N=26<br>(24m/2F)                          | Inductive thematic analysis              | <i>"... to develop a better understanding of the respective experiences, perceptions, and challenges both patients with chronic pain and PCPs face communicating with each other about pain management in the primary care setting."</i>                                                     | None reported                               | 17/20      | P         |
| <b>3 Blake et al 2007</b> <sup>19</sup><br>Experiences of patients requiring strong opioid drugs for chronic non-cancer pain: a patient initiated study | UK      | One focus group N=4<br>(2M/2F) and interviews<br>N=10<br>(3M/5F) | Interpretative Phenomenological Analysis | <i>"...to determine the attitudes and experiences of patients receiving long-term strong opioid medication for chronic non-cancer pain in primary care."</i>                                                                                                                                 | Individual opioid dosages                   | 19/20      | R         |
| <b>4 Brooks et al 2015</b> <sup>20</sup><br>Exploring the lived experience of adults using prescription opioids to manage chronic noncancer pain        | Canada  | In-depth interviews<br>N=9 (4M/5F)                               | Interpretative Phenomenological Analysis | <i>"...to explore the lived experience of adults using prescription opioids to manage CNCP, focusing on how opioid medication affected their daily lives."</i>                                                                                                                               | None reported                               | 17/20      | R         |

|                                                          |                                                                                                                                                                                   |        |                                                                               |                                                       |                                                                                                                                                                                                                                                                                                                                                                                                   |               |       |   |
|----------------------------------------------------------|-----------------------------------------------------------------------------------------------------------------------------------------------------------------------------------|--------|-------------------------------------------------------------------------------|-------------------------------------------------------|---------------------------------------------------------------------------------------------------------------------------------------------------------------------------------------------------------------------------------------------------------------------------------------------------------------------------------------------------------------------------------------------------|---------------|-------|---|
| 1<br>2<br>3<br>4<br>5<br>6<br>7<br>8<br>9<br>10          | <b>5 Buchbinder et al 2014</b> <sup>21</sup> “Is there any way I can get something for my pain?” Patient strategies for requesting analgesics                                     | USA    | Audio recorded clinical encounters<br>N=74<br>(37M/37F)                       | Qualitative approach based on conversational analysis | <i>“We examined the direct and indirect means by which patients express a desire for analgesic medication.”</i>                                                                                                                                                                                                                                                                                   | None reported | 18/20 | I |
| 11<br>12<br>13<br>14<br>15<br>16<br>17<br>18<br>19       | <b>6 Chang Y-P et al 2011</b> <sup>22</sup> Use of Prescription Opioid Medication among Community-Dwelling Older Adults with Noncancer Chronic Pain                               | USA    | Face to face interview<br>N=21<br>(13M/8F)<br>≥65yrs                          | Content analysis, mixed methods                       | <i>“... to: (1) describe older adults’ patterns of adherence to their prescription opioid medication regimens and their reasons for these medication use patterns; and (2) examine the associations between adherence of prescription opioids, pain intensity, and pain interference on daily activity.”</i>                                                                                      | None reported | 16/20 | P |
| 20<br>21<br>22<br>23<br>24<br>25<br>26<br>27<br>28       | <b>7 Chang,F et al 2017</b> <sup>23</sup> Perceptions of Community-Dwelling Patients and Their Physicians on OxyContin® Discontinuation and the Impact on Chronic Pain Management | Canada | Pt interviews<br>N=13<br>1M/ 12F                                              | Not specified, no references given                    | <i>“... to explore the perceptions of patients with chronic pain and their physicians on OxyContin discontinuation and the impact that it had on chronic pain care and management.”</i>                                                                                                                                                                                                           | None reported | 16/20 | P |
| 29<br>30<br>31<br>32<br>33<br>34<br>35<br>36<br>37<br>38 | <b>8 Coyne et al 2015</b> <sup>24</sup> Assessment of a Stool Symptom Screener and Understanding the Opioid-Induced Constipation Symptom Experience                               | USA    | Cognitive interview semi structured think-aloud approach<br>N=66<br>(27M/39F) | Content analysis                                      | <i>“...to evaluate the content validity of the Stool Symptom Screener by assessing patient understanding of its items, patient ability to differentiate among response options, and patient perceptions about the use of a 2-week recall period for evaluating stool symptoms, BMs, and laxative use.<br/>- to evaluate how patients describe their constipation experience and to understand</i> | None reported | 17/20 | I |

1  
2  
3  
4  
5  
6  
7  
8  
9  
10  
11  
12  
13  
14  
15  
16  
17  
18  
19  
20  
21  
22  
23  
24  
25  
26  
27  
28  
29  
30  
31  
32  
33  
34  
35  
36  
37  
38  
39  
40  
41  
42  
43  
44  
45  
46

|                                                                                                                                                                               |     |                                                                                                  |                                                                                                                  |                                                                                                                                                                                                                                              |                                                                         |       |   |
|-------------------------------------------------------------------------------------------------------------------------------------------------------------------------------|-----|--------------------------------------------------------------------------------------------------|------------------------------------------------------------------------------------------------------------------|----------------------------------------------------------------------------------------------------------------------------------------------------------------------------------------------------------------------------------------------|-------------------------------------------------------------------------|-------|---|
|                                                                                                                                                                               |     |                                                                                                  |                                                                                                                  | <i>whether this differs between patients who frequently use laxatives and those who do not.</i>                                                                                                                                              |                                                                         |       |   |
| <b>9 Esquibel et al 2014</b> <sup>25</sup><br>Doctors and patients in pain: Conflict and collaboration in opioid prescription in primary care                                 | USA | In depth interviews with pts with CNCP receiving opioids and their physicians. N=21 pts (8M/13F) | Immersion/ crystallization process to generate a thematic codebook. Mixed methods with some quant. data analysis | <i>"...to better understand the effects of COT [chronic opioid therapy] on the doctor-patient relationship."</i>                                                                                                                             | None reported                                                           | 20/20 | R |
| <b>10 Frank et al 2016</b> <sup>26</sup><br>Patients' Perspectives on Tapering of Chronic Opioid Therapy: A Qualitative Study                                                 | USA | Semi-structured interviews N=24 (11M/13F)                                                        | Team based, mixed inductive and deductive approach guided by the Health Belief Model                             | <i>"... to explore patients' perspectives on opioid tapering."</i>                                                                                                                                                                           | MED: Used algorithm<br><br>Median (IQR)<br>70 (30-165)<br>Range 15-1845 | 20/20 | R |
| <b>11 Green et al 2017</b> <sup>27</sup><br>Perpetuating stigma or reducing risk? Perspectives from naloxone consumers and pharmacists on pharmacy-based naloxone in 2 states | USA | 8 focus groups (only 2 with patients with chronic pain) N=15 (8M/7F)                             | Thematic analysis. Content analysis with a collaborative codebook development process                            | <i>"...to explore the attitudes of various stakeholders toward pharmacy-based naloxone and opioid medication safety and to capture the range of initial experiences with pharmacy naloxone in 2 states with pharmacy naloxone policies."</i> | None reported                                                           | 18/20 | P |

|                                                                                              |                                                                                                                                                                                                                       |     |                                                                                                                                    |                                                                                         |                                                                                                                                                                                                                                                                                                                                       |                                                                                              |       |   |
|----------------------------------------------------------------------------------------------|-----------------------------------------------------------------------------------------------------------------------------------------------------------------------------------------------------------------------|-----|------------------------------------------------------------------------------------------------------------------------------------|-----------------------------------------------------------------------------------------|---------------------------------------------------------------------------------------------------------------------------------------------------------------------------------------------------------------------------------------------------------------------------------------------------------------------------------------|----------------------------------------------------------------------------------------------|-------|---|
| 1<br>2<br>3<br>4<br>5<br>6<br>7<br>8<br>9<br>10<br>11                                        | <b>12 Hooten et al 2011</b> <sup>28</sup><br>Smoking Cessation and<br>Chronic Pain: Patient<br>and Pain Medicine<br>Physician Attitudes                                                                               | USA | N = 18<br>Interviews<br>N= 15 and<br>focus group<br>N=3 10M/8F                                                                     | Participatory<br>research,<br>mixed<br>methods -<br>Thematic and<br>content<br>analysis | <i>"...to determine the attitudes and beliefs of both patients and pain medicine physicians regarding smoking cessation interventions applied during pain therapy."</i>                                                                                                                                                               | MED - used<br>equianalgesic<br>conversion<br>software<br>programme<br>Mean ± SD<br>227 ± 356 | 18/20 | I |
| 12<br>13<br>14<br>15<br>16<br>17<br>18<br>19<br>20                                           | <b>13 Krebs et al 2014</b> <sup>29</sup><br>Barriers to Guideline-<br>Concordant Opioid<br>Management in Primary<br>Care—A Qualitative<br>Study                                                                       | USA | Semi<br>structured<br>interviews<br>N= 26<br>patients (14<br>PC<br>physicians)<br>13M/13F                                          | Immersion<br>crystallization<br>approach                                                | <i>"...to better understand primary care physicians' and patients' perspectives on recommended opioid management practices and to identify potential barriers and facilitators of guideline concordant opioid management in primary care."</i>                                                                                        | None reported                                                                                | 16/20 | P |
| 21<br>22<br>23<br>24<br>25<br>26<br>27<br>28<br>29<br>30                                     | <b>14 Matthias et al 2014</b> <sup>30</sup><br>Communicating<br>about opioids for<br>chronic pain: A<br>qualitative study of<br>patient attributions and<br>the influence of the<br>patient–physician<br>relationship | USA | Audio<br>Recordings<br>of primary<br>care visits<br>and Semi-<br>structured<br>interviews<br>after clinic<br>visit. N=30<br>26M/4F | Immersion/cry<br>stallization<br>approach                                               | <i>"...to advance understanding about communication about opioids by directly capturing clinical communication about opioids, as well as interviewing patients to gain insight into communication patterns and their broader relationships with their physicians, and how these relationships shape communication about opioids."</i> | None reported                                                                                | 18/20 | R |
| 31<br>32<br>33<br>34<br>35<br>36<br>37<br>38<br>39<br>40<br>41<br>42<br>43<br>44<br>45<br>46 | <b>15 McCrorie et al<br/>2015</b> <sup>31</sup> Understanding<br>long-term opioid<br>prescribing for non-<br>cancer pain in primary<br>care: a qualitative<br>study                                                   | UK  | Semi<br>structured<br>interviews<br>with patients<br>(focus<br>groups with                                                         | Grounded<br>approach for<br>thematic<br>analysis.<br>Constant<br>comparison             | <i>"... to understand the processes which bring about and perpetuate long-term prescribing of opioids for chronic, non-cancer pain. We interviewed patients and GPs about their experiences, beliefs and expectations of analgesia prescribing, to improve understanding of how</i>                                                   | None reported                                                                                | 17/20 | R |

|                                                                                                                                                                                                    |           |                                             |                                                                                                                                         |                                                                                                                                                                                                                                                                                                                                                                                                                                         |                                      |       |   |
|----------------------------------------------------------------------------------------------------------------------------------------------------------------------------------------------------|-----------|---------------------------------------------|-----------------------------------------------------------------------------------------------------------------------------------------|-----------------------------------------------------------------------------------------------------------------------------------------------------------------------------------------------------------------------------------------------------------------------------------------------------------------------------------------------------------------------------------------------------------------------------------------|--------------------------------------|-------|---|
|                                                                                                                                                                                                    |           | GPs) N=23<br>6M/17F                         |                                                                                                                                         | <i>problematic long-term opioid prescribing becomes established</i> ".                                                                                                                                                                                                                                                                                                                                                                  |                                      |       |   |
| <b>16 Mueller et al 2016</b> <sup>32</sup><br>Attitudes Toward Naloxone Prescribing in Clinical Settings: A Qualitative Study of Patients Prescribed High Dose Opioids for Chronic Non-Cancer Pain | USA       | Semi-structured interview<br>N=24<br>8M/16F | Ethnographic iterative methods. Inductive and deductive approaches                                                                      | <i>"This study assessed the knowledge and attitudes toward naloxone prescribing among non-cancer patients prescribed opioids in primary care."</i>                                                                                                                                                                                                                                                                                      | Inclusion criteria $\geq 100$ mg MED | 16/20 | I |
| <b>17 Paterson et al 2016</b> <sup>33</sup><br>Resisting Prescribed Opioids: A Qualitative Study of Decision Making in Patients Taking Opioids for Chronic Noncancer Pain                          | Australia | Qualitative individual interviews<br>N=20   | Constant comparison and decision making explored in depth and with a thematic analysis utilizing a published "Model of medicine-taking" | <i>"...to identify the varying influences on patients' decisions about their use of prescribed long-term opioids. The research questions are: 1) does this conceptual Model of medicine-taking apply to people taking prescribed opioids, 2) is the concept of "resistance" to medication useful in this context, and 3) does this concept lead to new insights which may improve communication and shared decision making between"</i> | None reported                        | 18/20 | P |
| <b>18 Penney et al 2016</b> <sup>34</sup><br>Provider and patient perspectives on opioids                                                                                                          | USA       | 11 Focus groups N=80 and                    | Thematic coding ref                                                                                                                     | <i>"...to identify the practical issues patients and providers face when accessing alternatives to</i>                                                                                                                                                                                                                                                                                                                                  | None reported                        | 13/20 | P |

|                                                                                                                                                                         |        |                                                        |                                                                                          |                                                                                                                                                                                                                                                                                                                                                                                         |                                       |       |   |
|-------------------------------------------------------------------------------------------------------------------------------------------------------------------------|--------|--------------------------------------------------------|------------------------------------------------------------------------------------------|-----------------------------------------------------------------------------------------------------------------------------------------------------------------------------------------------------------------------------------------------------------------------------------------------------------------------------------------------------------------------------------------|---------------------------------------|-------|---|
| and alternative treatments for managing chronic pain: a qualitative study                                                                                               |        | individual interviews<br>N=10<br>27M/63F               | Ryan, Bernard<br>2003                                                                    | <i>opioids, and how multiple parties view these issues."</i>                                                                                                                                                                                                                                                                                                                            |                                       |       |   |
| <b>19 Rieb et al 2016</b> <sup>35</sup><br>Withdrawal-associated injury site pain (WISP): a descriptive case series of an opioid cessation phenomenon                   | Canada | In person semi structured interviews<br>N=21<br>14M/7F | Deductive and inductive approaches. Use of survey and emergent interview themes          | <i>".... to document the existence and characteristics of this pain phenomenon that we have named withdrawal-associated injury site pain (WISP)."</i>                                                                                                                                                                                                                                   | Recalled dose before WISP             | 18/20 | P |
| <b>20 Simmonds et al 2015</b> <sup>36</sup> A Qualitative Study of Veterans on Long-Term Opioid Analgesics: Barriers and Facilitators to Multimodality Pain Management  | USA    | Semi structured focus groups x 3 N=25<br>17M/8F        | Grounded theory-informed approach. Framework provided by the theory of planned behaviour | <i>"...to examine barriers and facilitators to multimodality chronic pain care among veterans on high-dose opioid analgesics for chronic non-cancer pain."</i>                                                                                                                                                                                                                          | Inclusion criteria at least 50 mg MED | 16/20 | P |
| <b>21 St Marie et al 2016</b> <sup>37</sup> Primary care experiences of people who live with chronic pain and receive opioids to manage pain: A qualitative methodology | USA    | Semistructured interviews.<br>N=12 6M/6F               | Thematic and interpretive analyses                                                       | <i>"...to provide a deeper understanding of the experiences, issues, and challenges that people face who live with chronic pain and received opioids to help manage their pain in primary care. The following research questions were addressed: (a) What are the experiences of individuals who live with chronic pain and receive opioid pain medications to manage their pain in</i> | None reported                         | 19/20 | R |

|                                                                                                                                                                                      |     |                                                                               |                                                    |                                                                                                                                                                                                                                 |                        |       |   |
|--------------------------------------------------------------------------------------------------------------------------------------------------------------------------------------|-----|-------------------------------------------------------------------------------|----------------------------------------------------|---------------------------------------------------------------------------------------------------------------------------------------------------------------------------------------------------------------------------------|------------------------|-------|---|
|                                                                                                                                                                                      |     |                                                                               |                                                    | <i>primary care? (b) What have been their healthcare experiences as they strive to manage their pain?"</i>                                                                                                                      |                        |       |   |
| <b>22 Vallerand et al 1 2009</b> <sup>38</sup> Chronic Opioid Therapy for Nonmalignant Pain: The Patient's Perspective. Part I— Life Before and After Opioid Therapy                 | USA | In depth serial interviews<br>N=22<br>6M/16F                                  | Phenomenologic study / Constant comparative method | <i>"...to examine the lived experience of adults receiving opioid therapy for relief of chronic non-malignant pain through the examination of data obtained through serial taper recorded interviews."</i>                      | Range<br>22.5 to 3,200 | 14/20 | R |
| <b>23 Vallerand et al 2 2010</b> <sup>39</sup> Chronic Opioid Therapy for Non-malignant Pain: The Patient's Perspective. Part II— Barriers to Chronic Opioid Therapy                 | USA | In depth serial narrative interviews<br>N=22<br>6M/16F                        | Phenomenologic study / Constant comparative method | <i>"...to elucidate the essence of the lived experience of patients receiving chronic opioid therapy for chronic non-malignant pain through examining their life narratives."</i>                                               | None reported          | 13/20 | R |
| <b>24 Wallace et al 2014</b> <sup>40</sup> Voices that may not otherwise be heard: a qualitative exploration into the perspectives of primary care patients living with chronic pain | USA | Photovoice photos, Interviews<br>1st N=31 2nd N=25 , and focus groups<br>N=19 | Grounded theory                                    | <i>"...this study examined the utility of a combination of qualitative methods (Photovoice, one-on-one interviews, and focus groups) in examining the daily experiences of primary care patients living with chronic pain".</i> | None reported          | 16/20 | R |
| <b>25 Warms et al 2005</b> <sup>41</sup> There are a few things you did not ask about my pain: writing on the margins of a survey                                                    | USA | Comments written in the margins of a questionnaire<br>N=797                   | Content analysis                                   | <i>"...to determine the characteristics of those who wrote comments [written in the margin of survey questionnaire] and to understand what was being communicated in their comments."</i>                                       | None reported          | 16/20 | P |

|                                                                            |                                                                                                                                                                                                   |           |                                                             |                                               |                                                                                                                                                    |                                                                               |       |   |
|----------------------------------------------------------------------------|---------------------------------------------------------------------------------------------------------------------------------------------------------------------------------------------------|-----------|-------------------------------------------------------------|-----------------------------------------------|----------------------------------------------------------------------------------------------------------------------------------------------------|-------------------------------------------------------------------------------|-------|---|
| 1<br>2<br>3<br>4<br>5<br>6<br>7<br>8<br>9<br>10<br>11<br>12<br>13          | <b>26 Zgierska et al 2016</b><br><sup>42</sup> Mindfulness Meditation-Based Intervention Is Feasible, Acceptable, and Safe for Chronic Low Back Pain Requiring Long-Term Daily Opioid Therapy     | USA       | Qual data on treatment satisfaction and experience<br>N= 17 | Qualitative analysis methods. Grounded theory | <i>"... to determine feasibility, acceptability, and safety of an MM-based intervention in patients with CLBP requiring daily opioid therapy."</i> | Inclusion criteria $\geq 30$ mg MED<br><br>Mean $\pm$ SD<br>166.9 $\pm$ 153.7 | 18/20 | I |
| 14<br>15<br>16<br>17<br>18<br>19<br>20<br>21<br>22                         | <b>27 Zheng et al 2013</b><br><sup>43</sup> Chaos to Hope: A Narrative of Healing                                                                                                                 | Australia | In depth qual interviews (N=20)<br>10M/10F                  | Illness narratives. Thematic analysis         | <i>"...to investigate the progression of the illness and opioid journeys of people who are taking opioids for chronic non-cancer pain".</i>        | None reported                                                                 | 17/20 | P |
| 23                                                                         | <b>Rerun of search</b>                                                                                                                                                                            |           |                                                             |                                               |                                                                                                                                                    |                                                                               |       |   |
| 24<br>25<br>26<br>27<br>28<br>29<br>30<br>31<br>32<br>33                   | <b>28 Al Achkar et al 2017</b> <sup>44</sup> Exploring perceptions and experiences of patients who have chronic pain as state prescription opioid policies change: a qualitative study in Indiana | USA       | N=9<br>3M/6F                                                | Inductive emergent thematic analysis          | <i>"...to evaluate the impact of Indiana's opioid prescription legislation on the patient experiences around pain management."</i>                 | None reported                                                                 | 18/20 | R |
| 34<br>35<br>36<br>37<br>38<br>39<br>40<br>41<br>42<br>43<br>44<br>45<br>46 | <b>29 Matthias et al 2017</b><br><sup>45</sup> "I'm Not Gonna Pull the Rug out From Under You": Patient-Provider                                                                                  | USA       | N=37<br>12M/25F                                             | Inductive approach, constant comparison       | <i>"...to understand communication processes related to opioid tapering."</i>                                                                      | None reported                                                                 | 18/20 | R |



1  
2  
3  
4  
5  
6  
7  
8  
9  
10  
11  
12  
13  
14  
15  
16  
17  
18  
19  
20  
21  
22  
23  
24  
25  
26  
27  
28  
29  
30  
31  
32  
33  
34  
35  
36  
37  
38  
39  
40  
41  
42  
43  
44  
45  
46

|                                                                                                                                                                                                                          |     |                |                                                                                              |                                                                                                                                                                                                                                                             |               |       |   |
|--------------------------------------------------------------------------------------------------------------------------------------------------------------------------------------------------------------------------|-----|----------------|----------------------------------------------------------------------------------------------|-------------------------------------------------------------------------------------------------------------------------------------------------------------------------------------------------------------------------------------------------------------|---------------|-------|---|
| Communication About Opioid Tapering                                                                                                                                                                                      |     |                |                                                                                              |                                                                                                                                                                                                                                                             |               |       |   |
| <b>30 Matthias et al 2018</b><br><sup>46</sup> "I Was a Little Surprised": Qualitative Insights From Patients Enrolled in a 12-Month Trial Comparing Opioids With Nonopioid Medications for Chronic Musculoskeletal Pain | USA | N=34<br>28M/6F | Inductive approach, constant comparison                                                      | <i>"...to understand patients' experiences with the SPACE trial including their views and anticipated benefits of opioids, versus non -opioids, experiences with the intervention and to what extent expectations were met after completing the study."</i> | None reported | 19/20 | R |
| <b>31 Smith et al 2018</b> <sup>47</sup><br>Seeking Chronic Pain Relief: A Hermeneutic Exploration                                                                                                                       | USA | N=15<br>4M/11F | Concurrent embedded mixed methods design, Heideggerian hermeneutic phenomenological approach | <i>"This research presents an interpretation of the experience of seeking pain relief for a group of people taking opioid pain medications whose pain is not adequately controlled"</i>                                                                     | None reported | 20/20 | P |

Legend: GRADE-CERQual Relevance component: R= Relevant, P= Partial relevance, I= Indirect relevance, U=Uncertain relevance

IQR = Interquartile Range, SD = Standard Deviation

#### *Step 5 Translating studies into each other*

Patterns and associations between categories were explored and all researchers felt that a line of argument approach as defined by Noblit and Hare<sup>9</sup> would be the most useful method to interpret the data.

#### *Step 6 Synthesising Translations*

Agreement was reached by clearly defining the over-arching or 3<sup>rd</sup> order concepts arising from the data. A third order concept is the reviewers' interpretation of second order concepts.

#### *Step 7 Expressing the synthesis*

We developed a conceptual model to show how the themes related to each other in a line of argument. (see figure 1)

*Insert figure 1 about here.*

#### *Patient and Public Involvement*

We did not involve patients or the public in our work.

#### *Results*

Two reviewers VN and ST screened 2994 titles or abstracts (after the removal of duplicates from the 5064 citations retrieved) and identified 153 full texts of interest.

Two reviewers VN and KS read these and 122 were excluded. Reasons are given in the PRISMA flowchart, see figure 2. The reviewers agreed to include 31 studies. The included studies were from US (23), Canada (4) UK (2), and Australia (2) and used a range of qualitative methods.

We report the 4 facets of GRADE-CERQual for all papers. 1) Methodological 2) Confidence 3) Relevance 4) Adequacy of data - See table 2 below.

Table 2 Confidence in review findings: GRADE-CERQual assessment

| Review findings                                           | Studies contributing (see table 1 column 1 for study number)                        | Methodological limitations (study number)     | Relevance (See table 1 end column)      | Coherence      | Adequacy of data |
|-----------------------------------------------------------|-------------------------------------------------------------------------------------|-----------------------------------------------|-----------------------------------------|----------------|------------------|
| Reluctant users with little choice                        | 1,3,4,5,6,7,17,18,21,22,26,27,30 (13 studies)                                       | 11 no concerns<br>2 minor concerns (18,22)    | 5 Relevant<br>6 Partial<br>2 Indirect   | No concerns    | No concerns      |
| Understanding opioids: the good the bad                   | 1,3,7,9,10,11,15,16,17,23,25,27,29 (13 studies)                                     | 12 no concerns<br>1 minor concerns (23)       | 6 Relevant<br>6 Partial<br>1 Indirect   | No concerns    | No concerns      |
| A therapeutic alliance: not always on the same page       | 1,2,3,4,5,7,9,10,11,13,14,15,16,17,18,19,20,21,22,23,24,25,26,28,29,31 (26 studies) | 23 no concerns<br>3 minor concerns (18,22,23) | 12 Relevant<br>11 Partial<br>3 Indirect | No concerns    | No concerns      |
| Stigma: feeling scared, and secretive but needing support | 1,2,3,4,7,9,10,14,16,17,18,20,21,22,23,24,27,28,31 (19 studies)                     | 16 no concerns<br>3 minor concerns (18,22,23) | 10 Relevant<br>8 Partial<br>1 Indirect  | No concerns    | No concerns      |
| The challenge of tapering/ withdrawal from opioids        | 7,10,18,19,30,31 (6 studies)                                                        | 5 no concerns<br>1 minor concerns (18)        | 2 Relevant<br>4 Partial                 | Minor concerns | Minor concerns   |

Legend of GRADE-CERQual component scoring:

|                                                         |                                                                                      |
|---------------------------------------------------------|--------------------------------------------------------------------------------------|
| Methodological limitations, Coherence, Adequacy of data | No or very minor concerns<br>Minor concerns<br>Moderate concerns<br>Serious concerns |
| Relevance:                                              | Relevant<br>Partial<br>Indirect<br>Uncertain                                         |

### Synthesis of Findings

We abstracted five themes from the 2<sup>nd</sup> order concepts. Table 3 below shows how each study contributed to each theme. We have illustrated each concept with exemplary quotations.

Table 3 Themes apparent in each study

| Author date                   | RU | U | TA | S | TW |
|-------------------------------|----|---|----|---|----|
| 1 Arnaert and Ciccotosto 2006 | X  | X | X  | X |    |

|                                  |           |          |           |          |           |
|----------------------------------|-----------|----------|-----------|----------|-----------|
| 2 Bergman, Matthias et al 2013   |           |          | X         | X        |           |
| 3 Blake, Ruel et al 2007         | X         | X        | X         | X        |           |
| 4 Brooks, Unruh et al 2015       | X         |          | X         | X        |           |
| 5 Buchbinder, Wilbur et al 2014  | X         |          | X         |          |           |
| 6 Chang Y-P, Wray et al 2011     | X         |          |           |          |           |
| 7 Chang,F and Ibrahim,S 2017     | X         | X        | X         | X        | X         |
| 8 Coyne, Currie et al 2015       |           |          |           |          |           |
| 9 Esquibel and Borkan 2014       |           | X        | X         | X        |           |
| 10 Frank, Levy et al 2016        |           | X        | X         | X        | X         |
| 11 Green, Case et al 2017        |           | X        | X         |          |           |
| 12 Hooten, Vickers et al 2011    |           |          |           |          |           |
| 13 Krebs, Bergman et al 2014     |           |          | X         |          |           |
| 14 Matthias,Krebs et al 2013     |           |          | X         | X        |           |
| 15 McCrorie, Closs et al 2015    |           | X        | X         |          |           |
| 16 Mueller, Koester et al 2016   |           | X        | X         | X        |           |
| 17 Paterson, Ledgerwood 2016     | X         | X        | X         | X        |           |
| 18 Penney, Ritenbaugh et al 2016 | X         |          | X         | X        | X         |
| 19 Rieb, Norman et al 2016       |           |          | X         |          | X         |
| 20 Simmonds, Finley et al 2015   |           |          | X         | X        |           |
| 21 St Marie et al 2015           | X         |          | X         | X        |           |
| 22 Vallerand et al 1 2009        | X         |          | X         | X        |           |
| 23 Vallerand et al 2 2010        |           | X        | X         | X        |           |
| 24 Wallace et al 2014            |           |          | X         | X        |           |
| 25 Warms et al 2005 o            |           | X        | X         |          |           |
| 26 Zgierska et al 2016           | X         |          | X         |          |           |
| 27 Zheng et al 2013              | X         | X        |           | X        |           |
| <b>Studies from search rerun</b> | <b>RU</b> | <b>U</b> | <b>TA</b> | <b>S</b> | <b>TW</b> |
| 28 Al Achkar et al 2017          |           |          | X         | X        | X         |
| 29 Matthias et al 2017           |           | X        | X         |          | X         |
| 30 Matthias et al 2018           | X         |          |           |          |           |
| 31 Smith et al 2018              |           |          | X         | X        |           |

**Legend:**

RU = Reluctant users with little choice

U = Understanding about opioids: the good and the bad

TA = A therapeutic alliance: not always on the same page

S = Stigma: feeling scared, and secretive but needing support

TW = The challenges of tapering or withdrawal

X = theme present in paper

**1) Reluctant users with little choice**

This describes a resistance or hesitancy to take opioids mainly due to concerns about side effects or addiction, although they felt there were no other options available.

*“I don’t want to become addicted, if I’m going to become addicted then as far as I’m concerned I’m a druggie, so I might as well not be here anyway, so I don’t want to become addicted...”* Blake et al Pg103

1  
2  
3           *"I just didn't want to go on them because I mean once you get on them that's*  
4           *it, you're sort of stuck on them. I didn't want to take morphine at first because*  
5           *there was a girl that I went through one of the courses with and she always*  
6           *seemed really dopey and drugged up so it took them a long while*  
7           *to talk me to into taking the morphine because I didn't want to be like that.*

8  
9  
10  
11  
12  
13  
14  
15       Zheng et al pg 1832

16  
17       Some spoke of underusing or were keen to reduce their medications when possible.

18  
19       There was a dislike of being on long term medication and some thought that it would  
20  
21       not relieve their pain.

22  
23           *"I don't want to do that [take more morphine]. I want to stay on as little as I*  
24           *possibly can because there might come a time when I need more and I don't*  
25           *want to be on high doses. I've always tried to keep it at a minimum amount of*  
26           *tablets each day..."* Blake et al Pg 105  
27  
28  
29  
30  
31

32  
33       Even though some were reluctant there were other instances of dramatic improvement  
34  
35       in people's lives. This then weighted their choice to stay on the opioids.

36  
37           *"I mean it is just like a miracle as far as I am concerned. It is like knowing it*  
38           *[the pain] is there but you have the instruments to prevent it from getting out*  
39           *and [be]coming a roaring demon."* Vallerand et al 1pg 170  
40  
41  
42  
43

44           *"But opiates, that's my way of life. There would be no life if I didn't have this.*  
45           *And I thank God for them because without them I'd be...well I wouldn't be. I*  
46           *just couldn't go on. I would have committed suicide a long time ago. And I say*  
47           *that truthfully cause you could not live like that, with that constant, constant*  
48           *pain. But, with the opiates it's made it possible to be able to have a part of a*  
49           *life, you know."* Brooks et al pg 20  
50  
51  
52  
53  
54  
55  
56  
57  
58  
59  
60

## 2) Understanding opioids: the good and the bad

This describes patients' knowledge or understanding about opioids which had generally been acquired ad hoc and slowly over time, from pharmacists, patient package inserts in their medication, leaflets, the internet, television programmes and from doctors, especially doctors at the pain clinic.

*"When you see it in the media, when you see it on the television, you think if you're taking regular morphine you must be in a pretty bad way, you know."*

Blake et al Pg103

*"I always ask before I go on a medication, what are the side effects, I was told I may experience constipation; nothing else was explained to me."*

Paterson et al pg 721

There was often poor knowledge about using opioids for chronic pain, and about addiction, overdose risk and side effects.

*"There's not too much education about it [overdose]... When I first started taking it [the opioid medication], no one told me about OD[overdose]or anything about that. Because I was taking it not [as] prescribed...I was just like when I felt pain I would just take like five or six of them or whatever. Then at the end, I'd run out."* Mueller et al pg 279

Patients often had to defend their usage and this added to their stress especially when they felt their healthcare professionals lacked an understanding of the place for opioids in the treatment of CNMP or were cautious about using them.

*"The concern is that if they increase my opioid dosage, I could stop breathing.*

*It's ridiculous."* Frank et al Pg1841

*"There are still a lot of doctors out there that are against it. They think it is bad. Bad medicine. Bad practice."* Vallerand et al 2 pg 129

1  
2  
3 In contrast, some people felt well informed which either produced more concern or  
4  
5 gave the patients confidence in their opioid regime.  
6

7  
8 *“... and from what I’ve read up, because I like to, sort of, keep on top of*  
9  
10 *things, that it’s an opium based drug, so you will build up some tolerance and*  
11  
12 *you will build up [becomes tearful] And you will potentially become sort of*  
13  
14 *addicted to it, if you like.” McCrorie et al pg 3*  
15

16  
17 *“Under Dr A [pain clinic] I’ve learnt more. And my concern has been, well it*  
18  
19 *was initially the possibility of addiction, but she has assured me that I’m not*  
20  
21 *showing no signs of addiction at all. I may have some withdrawal problems”*  
22

23  
24 Paterson et al Pg 721  
25

### 26 27 **3) A therapeutic alliance: not always on the same page** 28

29  
30 This describes a therapeutic alliance or the relationship between patients and their  
31  
32 health care providers which was considered important.  
33

34  
35 Overall there was a feeling that HCPs and patients were often ‘not on the same page’  
36  
37 about opioid usage.  
38

39  
40 *“My family doctor...does not want me to be dependent on heavy pain meds, so*  
41  
42 *I am intensely miserable 99% of the time.” Warms et al pg 252*  
43

44  
45 Some patients felt they were not listened to and were frustrated by a lack of empathy  
46  
47 from physicians regarding their pain experience.

48  
49 *“I frequently have difficulty with the residents (doctors in training) explaining*  
50  
51 *why these drugs, this many drugs...Finally Dr. [family physician] wrote a note*  
52  
53 *in my file – stop harassing [participant’s name]. This is what she gets and why*  
54  
55 *she gets it. And they did stop but it was inconvenient. For instance, they would*  
56  
57 *not prescribe me three months at a time. I would be dispensed one month at a*  
58  
59  
60

1  
2  
3 *time. And for someone who had been taking the same drugs for 10 years I*  
4  
5 *found that condescending.* ” Brooks et al pg 18  
6  
7

8 A reluctance to prescribe from GPs and pharmacists and the use of opioid contracts or  
9  
10 a restriction of medication were often considered punitive.  
11

12 *“It kind of made me feel like I was doing something wrong, which I wasn’t,*  
13  
14 *but I signed a contract. You know, what would I be without my meds?”* Krebs  
15  
16 et al pg 1152  
17

18  
19 *“And I told my doctor that, that I wanted so I could sleep through the night.*  
20  
21 *And now he, well, I’ll give you 10, but it’s got to last. Like he treats me like a*  
22  
23 *drug addict.”* Penney et al pg 6  
24  
25

26 The healthcare system often worked against a therapeutic alliance with lack of  
27  
28 continuity or care or frequent visits which fed into mistrust. Patients complained that  
29  
30 provider turnover affected their ability to receive individualised care; conversations  
31  
32 about pain and treatment options often had to be started over again from scratch.  
33  
34

35 *“I don’t have the same doctor long enough to know”.* Bergman et al pg 1693  
36

37 However having blood or urine tests for levels of opioids and regular checks were  
38  
39 seen by some as being cared for.  
40  
41

42 *“I would say, ‘I have this agreement and you don’t have to sign it if you don’t*  
43  
44 *want to, but I would like to go over it with you. These are suggestions because*  
45  
46 *this medication is addictive, it is dangerous, and I just want to make sure*  
47  
48 *you’re aware.’ I think if you really want to make it where people are not*  
49  
50 *hostile, say they have to have a urine test every 6 months, everybody, and that*  
51  
52 *it’s a policy because we care about all of you.’”* Krebs et al pg 1152  
53  
54  
55

56 Some talked of the need for good relationships built on trust, shared decision making  
57  
58 and knowledgeable specialists who communicate well.  
59  
60



1  
2  
3 *“I wouldn’t say I researched it to that depth, you know, I read a little bit*  
4 *about, and asked a lot of questions at my doctor, and then we decided.”*

5  
6  
7  
8 Paterson pg 722  
9

#### 10 11 **4) Stigma: feeling scared and secretive but needing support**

12  
13 This describes feelings of stigma and fear which people expressed directly in relation  
14 to their opioid usage. This includes peoples’ negative attitudes from family, medical  
15 professionals and work colleagues which lead to them feeling stigmatised and judged  
16 for taking opioids. This includes peoples’ negative attitudes from family, medical  
17 professionals and work colleagues which lead to them feeling stigmatised and judged  
18 for taking opioids.  
19  
20  
21

22  
23 *“So I’m constantly trying to clean up because I think people are going to*  
24 *judge me. ‘Oh, because she’s on all this medication, ooh, she can’t look after*  
25 *her children.’” Paterson et al pg 724*

26  
27  
28  
29  
30 *“As soon as you mention to someone that you are on pain medication it’s, ‘Oh*  
31 *my god, you’ve got to get off it.’ It is viewed as weak. Somehow I am weak for*  
32 *being on this medication.” Vallerand et al 2 pg 128*  
33  
34  
35

36  
37 To protect themselves some chose to keep their opioids a secret.

38  
39 *“But you know, after 2 years of pain, you are physically exhausted, mentally*  
40 *exhausted and depressed. So, I take my medication and I hide it at the bottom*  
41 *of my drawer. It’s my secret life. It’s always a secret, and I’ve got to hide it*  
42 *and not tell anyone.” Vallerand et al 1 pg 169*  
43  
44  
45  
46  
47

48  
49 Some people made a conscious decision about who they could tell and who they  
50 couldn’t due to negative reactions. Relationships suffered when patients felt  
51 unsupported.  
52  
53

54  
55 *“My son told me I was a drug addict. He did. He really did. He was to the*  
56 *point, he didn’t know what he could do for me. It really was that bad.”*  
57  
58

59  
60 Vallerand et al 2 pg 128

1  
2  
3 *“I had originally told my sister and she was very concerned. Then she said,*  
4 *‘As long as you don’t stay on them.’ She thought it was OK if I did it for a*  
5 *while but as long as I didn’t stay on them. So I just sort of never told her. And*  
6 *she never asked.”* Vallerand et al 2 pg 128  
7  
8  
9  
10  
11

12 Although some seemed confident in using opioids, mostly people spoke about fears  
13 such as; addiction and uncontrolled pain. Feeling supported validated their choices  
14 and experiences and lessened some of their fears and concerns.  
15  
16  
17

18  
19 *“And at the end, my partner says—we sat down there and he goes ‘Stay on*  
20 *them.’ ...I’ve always spoke to my partner, and if he’s been unsure— we’ve*  
21 *both been unsure, we’ve both gone into the doctor together to ask questions.”*  
22  
23  
24  
25  
26 Zheng et al pg 1834  
27

28 *“my wife wanted me to take this medication. She was like: let’s go for it.”*  
29  
30  
31 Arnaert et al pg 26  
32  
33

### 34 **5) The challenge of tapering/withdrawal from opioids**

35  
36  
37 Four papers<sup>23, 26 44, 45</sup> explore patients’ experiences of tapering or withdrawing as  
38 their main content. Two further papers<sup>34, 35</sup> addressed it as a more peripheral issue  
39 (see CERQual ratings in table 2). This describes the challenges and profound effects  
40 of tapering or withdrawing from opioids.  
41  
42  
43

44 Tapering and withdrawing from opioids could be challenging and provoke anxiety.  
45  
46

47  
48 *“I have a tremendous fear in a doctor saying I want you to taper off the*  
49 *methadone and get totally off the methadone with no alternative whatsoever. I*  
50 *think that would be an irrational decision by a doctor, and I probably*  
51 *wouldn’t take that advice.”* Frank et al pg1842  
52  
53  
54  
55

56  
57 This anxiety could be alleviated by support from a trusted health care provider or  
58 other person.  
59  
60

1  
2  
3 *“The best thing about it was that nobody acted like I was a bad person*  
4 *because I was on these medications and was having to be going through this*  
5 *really slow process of coming down off of them.” Frank et al pg1843*  
6  
7  
8  
9

10 Successful tapering was described as a collaborative agreement between HCP and  
11 patient.  
12  
13

14 *“She put me down to 2 and a half [pills per day]. Then she said, okay, we’ll*  
15 *go down to half a pill. I told her I didn’t think that just 2 a day would do it,*  
16 *and she said okay, we’ll try 2 and a half, are you agreeable with that? I said*  
17 *that’s fine. I mean, we can discuss stuff. It doesn’t have to be a disagreement*  
18 *because we can talk about it. It’s not an argument. We’re 2 adults having a*  
19 *conversation, figuring out what to do.” Matthias et al 2017 pg 1369*  
20  
21  
22  
23  
24  
25  
26  
27

28 However, not all people experienced joint decision making when tapering  
29

30 *“I just don’t feel that he’s understanding. he don’t seem to care what I’m*  
31 *saying, because he’s lowering it down anyway, even though I’ve told*  
32 *him...that I didn’t agree with it being lowered.” Matthias et al 2017 pg 1369*  
33  
34  
35  
36

37 For those in the USA, prescribing policies, advising clinicians to monitor and  
38 decrease opioid use, and the legislation to enforce these policies made those taking  
39 opioids feel as if they were ‘a public health problem’. This could have a negative  
40 effect on the doctor patient relationship and leave the patient feeling disempowered.  
41  
42  
43  
44  
45  
46

47 This was compounded when opioids had been withdrawn by legislation.<sup>23, 44</sup>  
48

49 *“I have to struggle, suffer, to make the next the next time that I can get my*  
50 *medicine. And I don’t think that’s fair to me because if I can take my medicine*  
51 *a little more regularly, I would be able to do more.....I don’t think that the*  
52 *law, people, politicians, or anybody should be able to tell anybody that’s in*  
53 *pain what type of medicine they can take.” Al Achkar et al pg 7*  
54  
55  
56  
57  
58  
59  
60

1  
2  
3 “That kinda got me mad, cause I thought well you know. . .they’re taking it off  
4 the market because of people abusing it. . .It’s not fair to us, you know. . . . I  
5 think the government was wrong to. . . pull them off the market, you know,  
6 because of people abusing them, no like they weren’t looking at the people  
7 that need them. . .But I think it’s really unfair that people that really do need  
8 them can’t get them.” Chang and Ibrahim 2017 pg 3  
9  
10  
11  
12  
13  
14  
15  
16  
17

### 18 **Overarching theme: Constantly balancing**

19  
20 After considering the five themes, an overarching theme emerged - ‘Constant  
21 balancing’. The theme *Reluctant users with little choice* describes the need to balance  
22 the pros and cons of starting opioids and the need to balance having pain with their  
23 hesitancy to use opioids.  
24  
25  
26  
27  
28  
29

30 “I don’t really like being on a lot of tablets, I’ve never been a tablet person,  
31 um. . . but I mean I can’t have the pain either so it’s one evil outdoing the  
32 other evil. Paterson et al pg 723  
33  
34  
35  
36

37 Studies describe balancing the dose for pain management with their side effects to  
38 allow them to function. Participants constantly weighed up the effects on their life;  
39 dealing with an internal conflict of unresolved pain versus necessary medication,  
40 being opioid free versus having uncontrolled pain and balancing other stressors  
41 against opioid dose changes.  
42  
43  
44  
45  
46  
47

48 “If you’re going to be able to walk, and you take one pain pill so you can walk  
49 and live life, you’re going to do it, even though you may not like it.” Penney et  
50 al pg 6  
51  
52  
53  
54

55 The theme *Stigma feeling scared and secretive but needing support*, describes the  
56 need to balance their hopes for relief with fear of side effects, and also to balance  
57  
58  
59  
60

1  
2  
3 whether or not to disclose their opioid use with the risk of being labelled a ‘drug  
4  
5 seeker’ versus having unrelieved pain.  
6

7  
8 *“I do it for my own protection by not telling them because I see how they react*  
9  
10 *by reading something in the paper...and it’s just their ignorance. And I don’t*  
11  
12 *have time. Well they know what’s going on but they don’t get it to this day. So*  
13  
14 *you have to pick your battles...” Brooks et al pg 19*  
15

16  
17 The theme *Understanding opioids; the good and the bad*, showed people had different  
18  
19 levels of understanding but weighed up their decisions and trade-offs against their  
20  
21 pain relief.  
22

23  
24 *“It’s, it’s got a good and bad side, morphine. ....When I take it, it works*  
25  
26 *really, really well but it makes you feel rather sick, umm, rather spaced out*  
27  
28 *and thinking wise, umm, it outcomes more on the other, do I want to be sick or*  
29  
30 *do I want to cry with pain? So I’d rather be sick but it is a very, very good*  
31  
32 *painkiller. ” Blake et al pg 105*  
33

34  
35 The therapeutic alliance theme showed that often it was evident that they were ‘not on  
36  
37 the same page’ with them balancing the advice from their doctors with what they  
38  
39 wanted.  
40

41  
42 *“[My provider] said you could die any time, and my husband and I said, well,*  
43  
44 *we realize that, but because of the pain, you know, we were willing to take that*  
45  
46 *risk that I would die from the narcotic medication.” Frank et al pg 1841*  
47

48  
49 It also meant that there were multiple barriers to the process of decreasing opioids due  
50  
51 to this constant balancing act which is described in the theme *the challenge of*  
52  
53 *tapering/withdrawal from opioids.*  
54  
55  
56  
57  
58  
59  
60

1  
2  
3 *“I will tell her, if I do come off this medication, there are going to be*  
4 *consequences. I can’t walk as often, I can’t stand as long, I just can’t do it....”*

5  
6  
7  
8 *Vallerand et al 1 pg 169*  
9

## 10 11 **Discussion**

12  
13 Our five themes were; 1) Reluctant users with little choice; 2) Understanding opioids:  
14 the good the bad; 3) A therapeutic alliance: not always on the same page; 4) Stigma:  
15 feeling scared and secretive but needing support; and 5) The challenge of tapering or  
16 withdrawal. An overarching theme of ‘constantly balancing’ emerged from the data.  
17  
18 These themes all had positive and negative aspects although the negative were more  
19 prevalent by far.  
20  
21

22 We present a line of argument of how complex it is for the patient to balance  
23 decisions at every stage of their journey. First their reluctance to start taking opioids  
24 but feeling they had no option. Patients are given opioids for CNMP often as a last  
25 resort when all other treatment has failed and their lives are so profoundly affected  
26 that they talk of a desperation, that they would literally ‘try anything’. Patients spoke  
27 about not being given any detailed information about opioids and that they had  
28 learned more about them over time from different sources. This varied understanding  
29 about opioids and their side effects can affect the decisions that people make. Patients  
30 reported the need to keep the dosage of opioids as low as possible and often that they  
31 were not at risk of addiction or overdose if they were taking them as prescribed. Even  
32 those who felt they may be addicted sometimes viewed this as an acceptable trade-off  
33 for pain relief. Our findings indicate that patient desperation combined with  
34 inadequate information from healthcare professionals could trigger the prescription of  
35 opioids. It may be that delivering accurate information about the potential side effects  
36  
37  
38  
39  
40  
41  
42  
43  
44  
45  
46  
47  
48  
49  
50  
51  
52  
53  
54  
55  
56  
57  
58  
59  
60

1  
2  
3 and limited efficacy of opioids for chronic pain management would reduce the use of  
4  
5  
6 opioids.

7  
8 Our findings demonstrate that the stigma surrounding how patients feel about being  
9  
10 on opioids can be compounded by the judgements of others. Although patients often  
11  
12 describe themselves in terms of 'reluctant users', if they experienced the benefits of  
13  
14 opioids through decreased pain and thus increased function they are often too scared  
15  
16 to reduce opioids and return to a life of potentially unmanaged pain.

17  
18  
19  
20  
21 Our findings suggest that clinicians and patients with chronic pain are not always 'on  
22  
23 the same page'. The theme *Therapeutic alliance* captures the positives, but also the  
24  
25 tensions and mismatches of perceptions held by healthcare providers who are  
26  
27 attempting to limit dose escalation, and patients who may view constant dose  
28  
29 escalation as an acceptable trade-off for reducing relentless pain. The therapeutic  
30  
31 alliance is a robust theme supported by 26 of the 31 studies included. This is not  
32  
33 surprising as patients rely on their health care professionals to prescribe opioids. This  
34  
35 finding resonates with qualitative evidence syntheses (QES) exploring the experience  
36  
37 of patients<sup>13</sup> and healthcare professionals<sup>48</sup> It seems clear that joint decision -making  
38  
39 is important for appropriate healthcare; however, our findings suggests that there are  
40  
41 instances of mistrust on both sides. A QES exploring clinicians experience of  
42  
43 prescribing opioids for chronic pain demonstrate that the process of prescribing  
44  
45 opioids is not straightforward for clinicians who face a complex decision - 'Should I  
46  
47 shouldn't I' prescribe opioids for chronic non-malignant pain<sup>48</sup>. They also  
48  
49 demonstrate that clinicians must walk a fine line to balance the pros and cons of  
50  
51 opioids whilst also maintaining patient trust. This suggests that both patients and  
52  
53  
54  
55  
56  
57  
58  
59  
60

1  
2  
3 HCPs find dealing with prescribing/taking opioids for CNMP is complex and involves  
4  
5 balancing and trade-offs.  
6

7  
8 Current guidance from Royal College of Anaesthetists in the UK and The Centers for  
9  
10 Disease Control and Prevention in the US advocate a preference for non-opioid  
11  
12 therapies in the treatment of CNMP<sup>49</sup>. If a clinician feels that opioids are indicated,  
13  
14 then they recommend a low dose for a short duration which should be assessed for  
15  
16 effectiveness and regularly evaluated for benefits and harms. All but four studies in  
17  
18 this review are between 2005 and 2017, prior to these guidelines. Opioid contracts in  
19  
20 some areas of the USA and Canada can make patients feel stigmatised and judged,  
21  
22 this effect can be moderated by a good therapeutic relationship, and reframing these  
23  
24 as agreements rather than contracts<sup>50</sup>. Some physicians may view  
25  
26 contracts/agreements as necessary to guard against uncontrolled dose escalation,  
27  
28 repeated demands for replacement of lost or misplaced medication, subversion and  
29  
30 illicit opioid intake. This finding resonates with Toye et al (2017) who describe the  
31  
32 moral boundary work and social guardianship that clinicians associate with opioid  
33  
34 prescription. Our findings suggest that this role does may not contribute to an  
35  
36 effective therapeutic partnership.  
37  
38  
39  
40  
41

#### 42 Limitations of this study

43  
44 A majority of the studies are from the United States and the findings need to be taken  
45  
46 in the context of its health and social care systems. Most of the articles in this  
47  
48 qualitative synthesis were published or the research was conducted, before the impact  
49  
50 of the opioid epidemic became clear to regulators and the medical profession. Some  
51  
52 papers discuss using opioids as a last resort, although the opioid epidemic, especially  
53  
54 in the US suggests they are not always given as a last resort. We acknowledge that  
55  
56 our interpretation of the data might have been influenced by the current, much more  
57  
58  
59  
60



1  
2  
3 critical perception of opioid use for chronic non-malignant pain. Further evidence is  
4  
5 needed to find out if these themes are universal for developed countries or whether  
6  
7 there are important differences.  
8  
9

10 Our conceptual framework highlights patients need to constantly balance and to  
11  
12 consider the pros and cons of taking opioids. This can have a profound effect on  
13  
14 peoples' relationships with their family, friends and health care providers and their  
15  
16 perceived standing in the community which is reflected in their careful balancing of  
17  
18 disclosure. The therapeutic alliance and having a clear understanding of all the  
19  
20 positive and negative aspects of opioids were important factors that underpinned their  
21  
22 ability to maintain this fragile balance. This balance might also affect a person's  
23  
24 desire or ability to taper or withdraw from opioids.  
25  
26  
27

28 The GRADE-CERQual ratings (table 2) revealed we had confidence in the findings  
29  
30 with only a few minor concerns and no moderate or serious concerns.  
31  
32  
33

### 34 **Conclusions and recommendations for future research**

35  
36 The first meta-ethnography on this topic revealed a constant balancing and a life in  
37  
38 flux in an effort to maintain participation in life and relationships. These are important  
39  
40 features of opioid use for CNMP. To maintain this delicate balance they often need  
41  
42 support from family or clinicians, however this balance can be upset by the feeling of  
43  
44 being judged by this same potential support system or peers and society at large  
45  
46 through the media. The therapeutic alliance with healthcare professionals, the extent  
47  
48 of people's understanding as well as the stigma attached to opioid use need to be  
49  
50 navigated by people who are often reluctant to be on opioids in the first place.  
51  
52  
53  
54  
55  
56  
57  
58  
59  
60

## Authors Contribution

VN and KS contributed to the review concept and design as part of the I-WOTCH process evaluation team. HS, SE, MU and KS were involved in the design of the IWOTCH study. VN, KS and FT screened search results or extracted data, conducted the analysis and synthesis. All authors contributed to data interpretation, revised the final manuscript critically for important intellectual content and appraised the final manuscript. VN prepared the final manuscript and will be the corresponding author.

## Funding

This project was funded by the National Institute for Health Research, Health Technology Assessment (project number 14/224/04). The views and opinions expressed therein are those of the authors and do not necessarily reflect those of the HTA, NIHR, NHS or the Department of Health. Ethics approval was provided by Yorkshire and the Humber South Yorkshire Research Ethics committee on 13-9-16.

## Declaration of competing interests

KS has undertaken other meta-ethnographies and was on the NIHR HS&DR Board until January 2018.

SE is investigator on a number of NIHR and industry sponsored studies. He received travel expenses for speaking at conferences from the professional organisations. SE consults for Medtronic, Abbott, Boston Scientific and Mainstay Medical, none in relation to opioids. SE is chair of the BPS Science and Research Committee. SE is deputy Chair of the NIHR CRN Anaesthesia Pain and Perioperative Medicine National Specialty Group. SE's department has received fellowship funding from Medtronic as well as nurse funding from Abbott.

1  
2  
3 HS is director of Health Psychology Services Ltd, providing psychological services  
4  
5 for a range of health related conditions.  
6

7  
8 MU was Chair of the NICE accreditation advisory committee until March 2017 for  
9  
10 which he received a fee. He is chief investigator or co-investigator on multiple  
11  
12 previous and current research grants from the UK National Institute for Health  
13  
14 Research, Arthritis Research UK and is a co-investigator on grants funded by the  
15  
16 Australian NHMRC. He is an NIHR Senior Investigator. He has received travel  
17  
18 expenses for speaking at conferences from the professional organisations hosting the  
19  
20 conferences. He is a director and shareholder of Clinvivo Ltd that provides electronic  
21  
22 data collection for health services research. He is part of an academic partnership with  
23  
24 Serco Ltd related to return to work initiatives. He is a co-investigator on a study  
25  
26 receiving support in kind from Stryker Ltd. He has accepted honoraria for teaching  
27  
28 from CARTA. He is an editor of the NIHR journal series, and a member of the NIHR  
29  
30 Journal Editors Group, for which he receives a fee.  
31  
32  
33  
34  
35  
36  
37

38 Data Availability Statement: Data is available on reasonable request.  
39  
40

## 41 Acknowledgements

42  
43 We would like to thank Samantha Johnson an academic librarian who helped with the  
44  
45 electronic searches and Dr Stephanie Tierney who helped to screen the citations.  
46  
47

## 48 References

- 49  
50  
51  
52 1. Breivik H, Collett B, Ventafridda V, et al. Survey of chronic pain in Europe:  
53 prevalence, impact on daily life, and treatment. *Eur J Pain*2006;10:287-333.  
54 2. Nahin RL. Estimates of pain prevalence and severity in adults: United States,  
55 2012. *J Pain*2015;16:769-80.  
56 3. Els C, Jackson TD, Kunyk D, et al. Adverse events associated with medium-  
57 and long-term use of opioids for chronic non-cancer pain: an overview of Cochrane  
58 Reviews. *Cochrane Database of Systematic Reviews*2017.  
59  
60

4. Gomes T, Tadrour M, Mamdani MM, et al. The burden of opioid-related mortality in the united states. *JAMA Network Open*2018;1:e180217.
5. Furlan AD, Sandoval JA, Mailis-Gagnon A, et al. Opioids for chronic noncancer pain: a meta-analysis of effectiveness and side effects. *CMAJ*2006;174:1589-94.
6. Busse JW, Wang L, Kamaleldin M, et al. Opioids for Chronic Noncancer Pain: A Systematic Review and Meta-analysis. *JAMA*2018;320:2448-60.
7. Sandhu HK, Abraham C, Alleyne S, et al. Testing a support programme for opioid reduction for people with chronic non-malignant pain: the I-WOTCH randomised controlled trial protocol. *BMJ Open*2019;9:e028937.
8. Nichols VP, Abraham C, Eldabe S, et al. Process evaluation protocol for the I-WOTCH study: an opioid tapering support programme for people with chronic non-malignant pain. *BMJ Open*2019;9:e028998.
9. Noblit GW and Hare RD. *Meta-ethnography: Synthesizing qualitative studies*. sage, 1988.
10. France EF, Cunningham M, Ring N, et al. Improving reporting of meta-ethnography: The eMERGe reporting guidance. *J Adv Nurs*2019;75:1126-39.
11. Manchikanti L, Helm S, 2nd, Fellows B, et al. Opioid epidemic in the United States. *Pain Physician*2012;15:ES9-38.
12. *Critical Appraisal Skills Programme (CASP)*. Oxford: Public Health Resource Unit, 2006.
13. Toye F, Seers K and Barker KL. Meta-ethnography to understand healthcare professionals' experience of treating adults with chronic non-malignant pain. *BMJ Open*2017;7:e018411.
14. Lewin S, Booth A, Glenton C, et al. Applying GRADE-CERQual to qualitative evidence synthesis findings: introduction to the series. *Implement Sci*2018;13:2.
15. Lewin S, Bohren M, Rashidian A, et al. Applying GRADE-CERQual to qualitative evidence synthesis findings-paper 2: how to make an overall CERQual assessment of confidence and create a Summary of Qualitative Findings table. *Implement Sci*2018;13:10.
16. Schutz AJCP. *Collected Papers*. Vol. 1. The Hague: Martinus Nijhoff.. 1964. 1962;2.
17. Arnaert A and Ciccotosto G. Response phases in methadone treatment for chronic nonmalignant pain. *Pain Management Nursing*2006;7:23-30.
18. Bergman AA, Matthias MS, Coffing JM, et al. Contrasting tensions between patients and PCPs in chronic pain management: a qualitative study. *Pain Medicine*2013;14:1689-97.
19. Blake S, Ruel B, Seamark C, et al. Experiences of patients requiring strong opioid drugs for chronic non-cancer pain: a patient-initiated study. *British Journal of General Practice*2007;57:101-8.
20. Brooks EA, Unruh A and Lynch ME. Exploring the lived experience of adults using prescription opioids to manage chronic noncancer pain. *Pain Research & Management*2015;20:15-22.
21. Buchbinder M, Wilbur R, McLean S, et al. "Is there any way I can get something for my pain?" Patient strategies for requesting analgesics. *Patient Education and Counseling*2015;98:137-43.
22. Chang Y-P, Wray LO, Sessanna L, et al. Use of prescription opioid medication among community-dwelling older adults with noncancer chronic pain. *Journal of Addictions Nursing (Taylor & Francis Ltd)*2011;22:19-24.

23. Chang F and Ibrahim S. Perceptions of community-dwelling patients and their physicians on OxyContin® discontinuation and the impact on chronic pain management. *Pain Research & Management*2017;2017:11.
24. Coyne KS, Currie BM, Holmes WC, et al. Assessment of a Stool Symptom Screener and Understanding the Opioid-Induced Constipation Symptom Experience. *Patient*2015;8:317-27.
25. Esquibel AY and Borkan J. Doctors and patients in pain: Conflict and collaboration in opioid prescription in primary care. *Pain*2014;155:2575-82.
26. Frank JW, Levy C, Matlock DD, et al. Patients' Perspectives on Tapering of Chronic Opioid Therapy: A Qualitative Study. *Pain Medicine*2016;17:1838-47.
27. Green TC, Case P, Fiske H, et al. Perpetuating stigma or reducing risk? Perspectives from naloxone consumers and pharmacists on pharmacy-based naloxone in 2 states. *Journal of the American Pharmacists Association*2017;57:S19-+.
28. Hooten WM, Vickers KS, Shi Y, et al. Smoking cessation and chronic pain: patient and pain medicine physician attitudes. *Pain Practice*2011;11:552-63.
29. Krebs EE, Bergman AA, Coffing JM, et al. Barriers to guideline-concordant opioid management in primary care-a qualitative study. *Journal of Pain*2014;15:1148-55.
30. Matthias MS, Krebs EE, Bergman AA, et al. Communicating about opioids for chronic pain: A qualitative study of patient attributions and the influence of the patient-physician relationship. *European Journal of Pain*2014;18:835-43.
31. McCrorie C, Closs SJ, House A, et al. Understanding long-term opioid prescribing for non-cancer pain in primary care: a qualitative study. *BMC Family Practice*2015;16:121.
32. Mueller SR, Koester S, Glanz JM, et al. Attitudes Toward Naloxone Prescribing in Clinical Settings: A Qualitative Study of Patients Prescribed High Dose Opioids for Chronic Non-Cancer Pain. *Journal of General Internal Medicine*2017;32:277-83.
33. Paterson C, Ledgerwood K, Arnold C, et al. Resisting Prescribed Opioids: A Qualitative Study of Decision Making in Patients Taking Opioids for Chronic Noncancer Pain. *Pain Medicine*2016;17:717-27.
34. Penney LS, Ritenbaugh C, DeBar LL, et al. Provider and patient perspectives on opioids and alternative treatments for managing chronic pain: a qualitative study. *BMC Family Practice*2017;17.
35. Rieb LM, Norman WV, Martin RE, et al. Withdrawal-associated injury site pain (WISP): A descriptive case series of an opioid cessation phenomenon. *Pain*2016;157:2865-74.
36. Simmonds MJ, Finley EP, Vale S, et al. A qualitative study of veterans on long-term opioid analgesics: barriers and facilitators to multimodality pain management. *Pain Medicine*2015;16:726-32.
37. St Marie B. Primary care experiences of people who live with chronic pain and receive opioids to manage pain: A qualitative methodology. *Journal of the American Association of Nurse Practitioners*2016;28:429-35.
38. Vallerand A and Nowak L. Chronic Opioid Therapy for Nonmalignant Pain: The Patient's Perspective. Part I-Life Before and After Opioid Therapy. *Pain Management Nursing*2009;10:165-72.
39. Vallerand A and Nowak L. Chronic opioid therapy for nonmalignant pain: the patient's perspective. Part II--Barriers to chronic opioid therapy. *Pain Management Nursing*2010;11:126-31.

- 1  
2  
3  
4  
5  
6  
7  
8  
9  
10  
11  
12  
13  
14  
15  
16  
17  
18  
19  
20  
21  
22  
23  
24  
25  
26  
27  
28  
29  
30  
31  
32  
33  
34  
35  
36  
37  
38  
39  
40  
41  
42  
43  
44  
45  
46  
47  
48  
49  
50  
51  
52  
53  
54  
55  
56  
57  
58  
59  
60
40. Wallace LS, Wexler RK, McDougale L, et al. Voices that may not otherwise be heard: A qualitative exploration into the perspectives of primary care patients living with chronic pain. *Journal of Pain Research*2014;7:291-99.
41. Warms CA, Marshall HM, Hoffman AJ, et al. There are a few things you did not ask about my pain: writing on the margins of a survey questionnaire. *Rehabilitation Nursing*2005;30:248-56.
42. Zgierska AE, Burzinski CA, Cox J, et al. Mindfulness Meditation-Based Intervention Is Feasible, Acceptable, and Safe for Chronic Low Back Pain Requiring Long-Term Daily Opioid Therapy. *Journal of Alternative & Complementary Medicine*2016;22:610-20.
43. Zheng Z, Paterson C, Ledgerwood K, et al. Chaos to hope: a narrative of healing. *Pain Medicine*2013;14:1826-38.
44. Al Achkar M, Revere D, Dennis B, et al. Exploring perceptions and experiences of patients who have chronic pain as state prescription opioid policies change: a qualitative study in Indiana. *BMJ open*2017;7:e015083.
45. Matthias MS, Johnson NL, Shields CG, et al. "I'm Not Gonna Pull the Rug out From Under You": Patient-Provider Communication About Opioid Tapering. *Journal of Pain*2017;18:1365-73.
46. Matthias MS, Donaldson MT, Jensen AC, et al. "I Was a Little Surprised": Qualitative Insights From Patients Enrolled in a 12-Month Trial Comparing Opioids With Nonopioid Medications for Chronic Musculoskeletal Pain. *Journal of Pain*2018;19:1082-90.
47. Smith CL, Severtsen B, Vandermause R, et al. Seeking Chronic Pain Relief: A Hermeneutic Exploration. *Pain Management Nursing*2018.
48. Toye F, Seers K, Tierney S, et al. A qualitative evidence synthesis to explore healthcare professionals' experience of prescribing opioids to adults with chronic non-malignant pain. *BMC Fam Pract*2017;18:94.
49. CDC. CDC Guideline for Prescribing Opioids for Chronic Pain: (2019, accessed 12-4-19).
50. Tobin DG, Keough Forte K and Johnson McGee S. Breaking the pain contract: A better controlled-substance agreement for patients on chronic opioid therapy. *Cleve Clin J Med*2016;83:827-35.

Figure 1 Concept model of the experiences of people taking opioid medication for chronic non-malignant pain



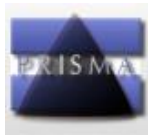

**Figure 2: PRISMA Flow Diagram**

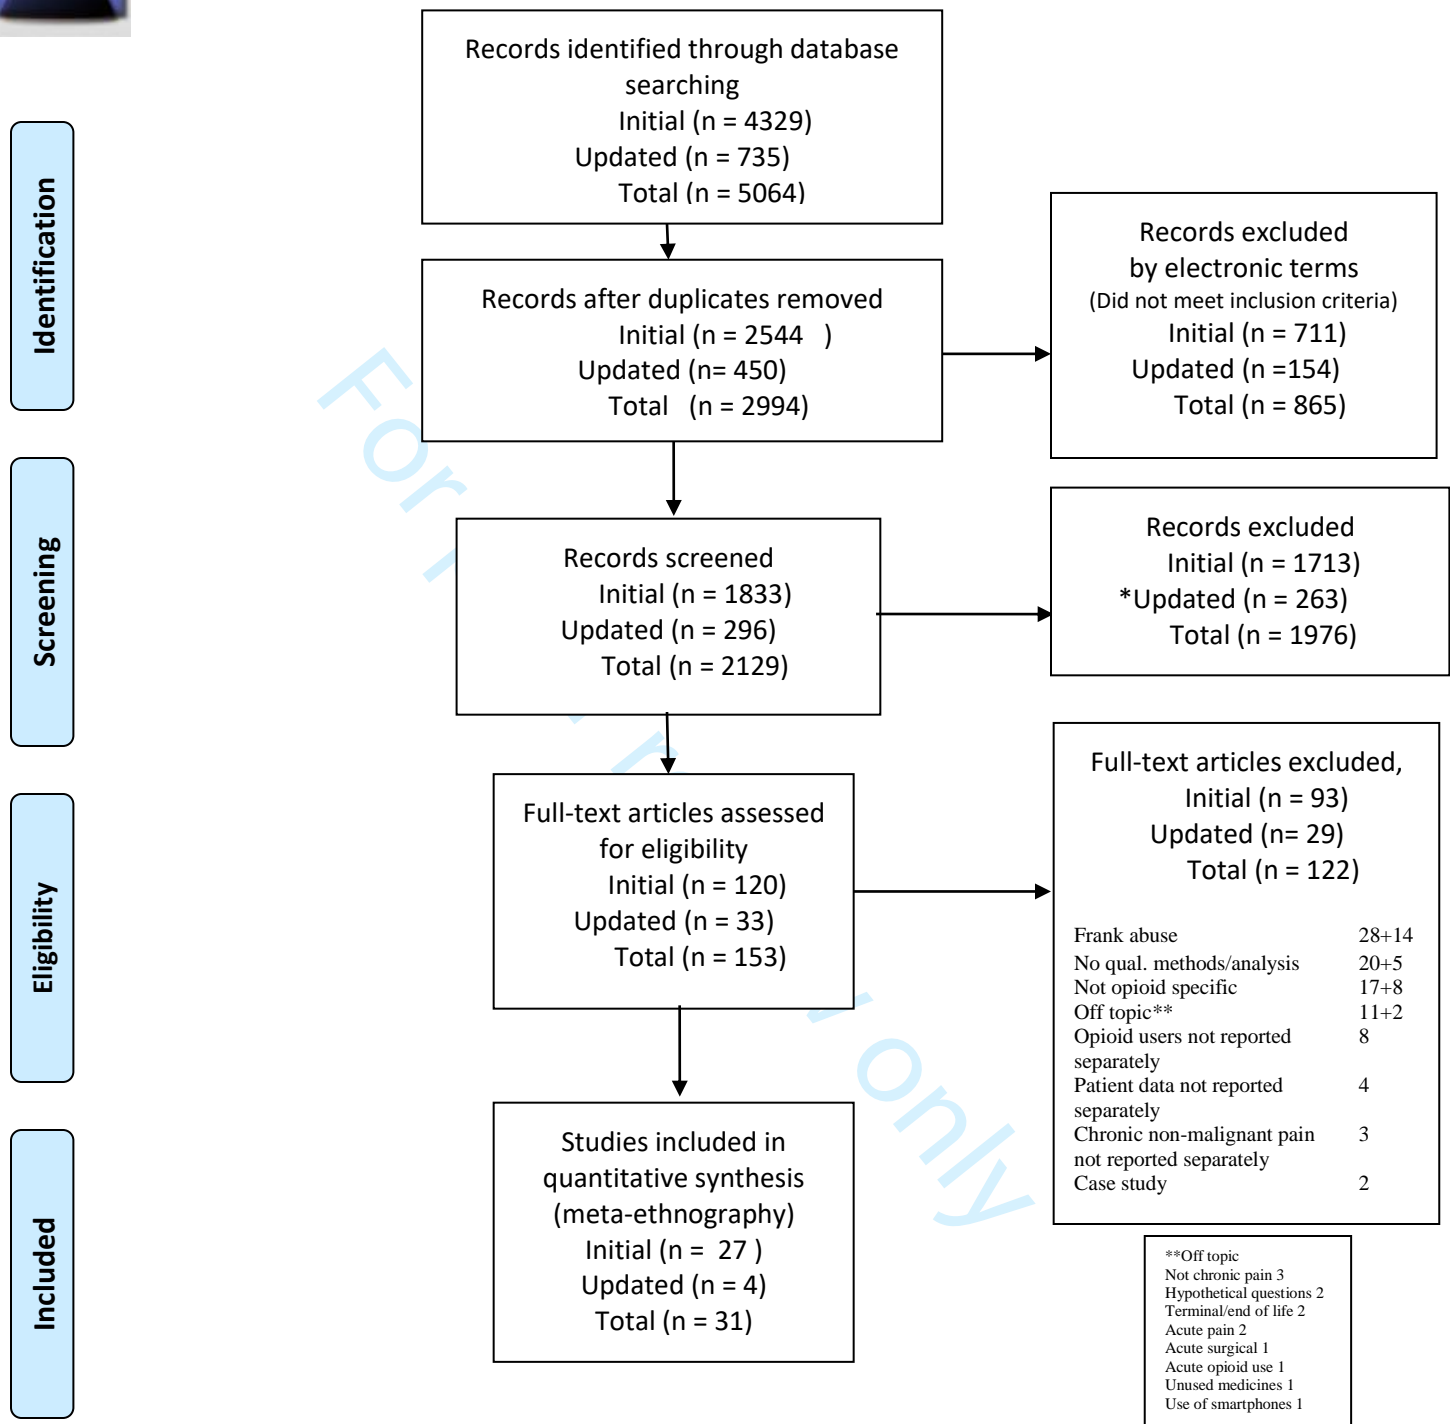

**Initial search June 2017 and updated search Sept 2018 reported.**

The search dates for the rerun could be specified in some databases, but not all. Therefore some papers were found in both searches. These twice found duplicate papers were removed at this point\*

From: Moher D, Liberati A, Tetzlaff J, Altman DG, The PRISMA Group (2009). Preferred Reporting Items for Systematic Reviews and Meta-Analyses: The PRISMA Statement. PLoS Med 6(7): e1000097. doi:10.1371/journal.pmed1000097



## Appendix 1 The eMERGe meta-ethnography reporting guidance

| <b>Numbered criteria headings with explanatory reporting criteria</b>                                                                                                                                                                                                                                                                                                                  | <b>Page</b> |
|----------------------------------------------------------------------------------------------------------------------------------------------------------------------------------------------------------------------------------------------------------------------------------------------------------------------------------------------------------------------------------------|-------------|
| <b>Phase 1—Selecting meta-ethnography and getting started</b>                                                                                                                                                                                                                                                                                                                          |             |
| <i>Introduction</i>                                                                                                                                                                                                                                                                                                                                                                    |             |
| 1 Rationale and context for the meta-ethnography<br>Describe the gap in research or knowledge to be filled by the meta-ethnography, and the wider context of the meta-ethnography                                                                                                                                                                                                      | 4           |
| 2 Aim(s) of the meta-ethnography<br>Describe the meta-ethnography aim(s)                                                                                                                                                                                                                                                                                                               | 4           |
| 3 Focus of the meta-ethnography<br>Describe the meta-ethnography review question(s) (or objectives)                                                                                                                                                                                                                                                                                    | 4           |
| 4 Rationale for using meta-ethnography<br>Explain why meta-ethnography was considered the most appropriate qualitative synthesis methodology                                                                                                                                                                                                                                           | 4           |
| <b>Phase 2—Deciding what is relevant</b>                                                                                                                                                                                                                                                                                                                                               |             |
| <i>Methods</i>                                                                                                                                                                                                                                                                                                                                                                         |             |
| 5 Search strategy<br>Describe the rationale for the literature search strategy                                                                                                                                                                                                                                                                                                         | 4/5         |
| 6 Search processes<br>Describe how the literature searching was carried out and by whom                                                                                                                                                                                                                                                                                                | 4/5         |
| 7 Selecting primary studies<br>Describe the process of study screening and selection, and who was involved                                                                                                                                                                                                                                                                             | 5           |
| <i>Findings</i>                                                                                                                                                                                                                                                                                                                                                                        |             |
| 8 Outcome of study selection<br>Describe the results of study searches and screening                                                                                                                                                                                                                                                                                                   | 16          |
| <b>Phase 3—Reading included studies</b>                                                                                                                                                                                                                                                                                                                                                |             |
| <i>Methods</i>                                                                                                                                                                                                                                                                                                                                                                         |             |
| 9 Reading and data extraction approach<br>Describe the reading and data extraction method and processes                                                                                                                                                                                                                                                                                | 6           |
| <i>Findings</i>                                                                                                                                                                                                                                                                                                                                                                        |             |
| 10 Presenting characteristics of included studies<br>Describe characteristics of the included studies                                                                                                                                                                                                                                                                                  | Table 1     |
| <b>Phase 4—Determining how studies are related</b>                                                                                                                                                                                                                                                                                                                                     |             |
| <i>Methods</i>                                                                                                                                                                                                                                                                                                                                                                         |             |
| 11 Process for determining how studies are related<br>Describe the methods and processes for determining how the included studies are related: - Which aspects of studies were compared AND- How the studies were compared                                                                                                                                                             | 6           |
| <i>Findings</i>                                                                                                                                                                                                                                                                                                                                                                        |             |
| 12 Outcome of relating studies<br>Describe how studies relate to each other                                                                                                                                                                                                                                                                                                            | 17          |
| <b>Phase 5—Translating studies into one another</b>                                                                                                                                                                                                                                                                                                                                    | 16          |
| <i>Methods</i>                                                                                                                                                                                                                                                                                                                                                                         |             |
| 13 Process of translating studies<br>Describe the methods of translation: - Describe steps taken to preserve the context and meaning of the relationships between concepts within and across studies- Describe how the reciprocal and refutational translations were conducted- Describe how potential alternative interpretations or explanations were considered in the translations | 16          |
| <i>Findings</i>                                                                                                                                                                                                                                                                                                                                                                        |             |
| 14 Outcome of translation<br>Describe the interpretive findings of the translation.                                                                                                                                                                                                                                                                                                    | 17 to 28    |
| <b>Phase 6—Synthesizing translations</b>                                                                                                                                                                                                                                                                                                                                               |             |
| <i>Methods</i>                                                                                                                                                                                                                                                                                                                                                                         |             |
| 15 Synthesis process<br>Describe the methods used to develop overarching concepts (“synthesised translations”)Describe how potential alternative interpretations or explanations were considered in the synthesis                                                                                                                                                                      | 16          |
| <i>Findings</i>                                                                                                                                                                                                                                                                                                                                                                        |             |
| 16 Outcome of synthesis process<br>Describe the new theory, conceptual framework, model, configuration, or interpretation of data developed from the synthesis                                                                                                                                                                                                                         | Figure 1    |
| <b>Phase 7—Expressing the synthesis</b>                                                                                                                                                                                                                                                                                                                                                |             |

|                                                                                                                                                                                                                                                                                                                                                                                                        |                     |
|--------------------------------------------------------------------------------------------------------------------------------------------------------------------------------------------------------------------------------------------------------------------------------------------------------------------------------------------------------------------------------------------------------|---------------------|
| <p><i>Discussion</i></p> <p>17 Summary of findings<br/>Summarize the main interpretive findings of the translation and synthesis and compare them to existing literature</p>                                                                                                                                                                                                                           | <p>28 to<br/>30</p> |
| <p>18 Strengths, limitations, and reflexivity<br/>Reflect on and describe the strengths and limitations of the synthesis:<br/>- Methodological aspects—for example, describe how the synthesis Findings were influenced by the nature of the included studies and how the meta-ethnography was conducted.<br/>- Reflexivity—for example, the impact of the research team on the synthesis findings</p> | <p>30</p>           |
| <p>19 Recommendations and conclusions<br/>Describe the implications of the Synthesis</p>                                                                                                                                                                                                                                                                                                               | <p>31</p>           |

Reference: France et al. BMC Medical Research Methodology (2019) 19:25  
<https://doi.org/10.1186/s12874-018-0600-0>

For peer review only

## Appendix 2 – example of search terms

Scopus

((TITLE-ABS-KEY(buprenorphine or fentanyl or heroin or hydromorphone or methadone or morphine or opium or oxycodone or pentazocine or tramadol or opiate\* or opioid\*) OR TITLE-ABS-KEY(suboxone or bunavail or zubsolv or dipipanone or diconal or wellconal or diamorphine or duragesic or fentora or actiq or abstral or recivit or effentora or instanyl or pecfent or oxycontin or roxicodone or oramorph or papaveretum or omnopon or fortral )OR TITLE-ABS-KEY(osegon or "talwin nx" or pethidine or meperidine or demerol or tapentadol or nucynta or palexia or tapal or ultram or zytram))) and ((TITLE-ABS-KEY(qualitative w/5 (theor\* or study or studies or research or analysis)) OR TITLE-ABS-KEY(ethno\* or emic or etic or phenomenolog\* or hermeneutic\* or heidegger\* or husserl\* or colaizzi\* or giorgi\* or glaser or strauss or (van and kaam\*) or (van and manen) or ricoeur or spiegelberg\* or merleau) OR TITLE-ABS-KEY(constant w/3 compar\*) OR TITLE-ABS-KEY(focus w/3 group\*) OR TITLE-ABS-KEY( grounded w/3 (theor\* or study or studies or research or analysis)) OR TITLE-ABS-KEY(narrative w/3 analysis) OR TITLE-ABS-KEY(discourse w/3 analysis) OR TITLE-ABS-KEY( (lived or life) w/3 experience\*) OR TITLE-ABS-KEY((theoretical or purposive) w/3 sampl\*) OR TITLE-ABS-KEY("field note\*" or "field record\*" or fieldnote\*) OR TITLE-ABS-KEY(participant\* w/3 observ\*) OR TITLE-ABS-KEY("action research") OR TITLE-ABS-KEY("digital adj record\*" or audiorecord\* or taperecord\* or videorecord\* or videotap\* ) OR TITLE-ABS-KEY(cooperative and inquir\*) OR TITLE-ABS-KEY(co and operative and inquir\*) OR TITLE-ABS-KEY(co-operative and inquir\*) OR TITLE-ABS-KEY( ("semi-structured" or semistructured or unstructured or structured) w/3 interview\*) OR TITLE-ABS-KEY((Informal or in-depth or indepth or "in depth") w/3 interview\*) OR TITLE-ABS-KEY(("face-to-face" or "face to face") w/3 interview\*) OR TITLE-ABS-KEY("ipa" or "interpretive phenomenological analysis") OR TITLE-ABS-KEY(social and construct\*) OR TITLE-ABS-KEY("appreciative inquiry") OR TITLE-ABS-KEY(poststructural\* or "post structural\*" or post-structural\*) OR TITLE-ABS-KEY( postmodern\* or "post modern\*" or post-modern\*) OR TITLE-ABS-KEY(feminis\*) OR TITLE-ABS-KEY(humanistic or existential or experiential))) and (TITLE-ABS-KEY(pain))

1  
2  
3  
4  
5  
6  
7  
8  
9  
10  
11  
12  
13  
14  
15  
16  
17  
18  
19  
20  
21  
22  
23  
24  
25  
26  
27  
28  
29  
30  
31  
32  
33  
34  
35  
36  
37  
38  
39  
40  
41  
42  
43  
44  
45  
46  
47  
48  
49  
50  
51  
52  
53  
54  
55  
56  
57  
58  
59  
60

For peer review only

## Appendix 3 Critical Appraisal Skills Programme (CASP) Quality appraisal tool scores

| Study            | Q1  | Q2  | Q3  | Q4  | Q5  | Q6  | Q7  | Q8  | Q9  | Q10 | Score |
|------------------|-----|-----|-----|-----|-----|-----|-----|-----|-----|-----|-------|
| Arnaert 2006     | Yes | Yes | Yes | Yes | ?   | No  | Yes | Yes | Yes | Yes | 17/20 |
| Bergman 2013     | Yes | Yes | Yes | Yes | Yes | No  | Yes | ?   | Yes | Yes | 17/20 |
| Blake 2007       | Yes | Yes | Yes | Yes | Yes | ?   | Yes | Yes | Yes | Yes | 19/20 |
| Brooks 2015      | Yes | Yes | Yes | Yes | Yes | No  | Yes | ?   | Yes | Yes | 17/20 |
| Buchbinder 2015  | Yes | Yes | Yes | Yes | Yes | No  | Yes | Yes | Yes | Yes | 18/20 |
| Chang F 2017     | Yes | Yes | Yes | Yes | Yes | No  | ?   | ?   | Yes | Yes | 16/20 |
| Chang Y-P 2011   | Yes | Yes | Yes | Yes | Yes | No  | Yes | ?   | ?   | Yes | 16/20 |
| Coyne 2015       | Yes | Yes | Yes | Yes | Yes | No  | Yes | ?   | Yes | Yes | 17/20 |
| Esquibel 2014    | Yes | Yes | Yes | Yes | Yes | Yes | Yes | Yes | Yes | Yes | 20/20 |
| Frank 2016       | Yes | Yes | Yes | Yes | Yes | Yes | Yes | Yes | Yes | Yes | 20/20 |
| Green 2017       | Yes | Yes | Yes | Yes | Yes | No  | Yes | Yes | Yes | Yes | 18/20 |
| Hooten 2011      | Yes | Yes | Yes | Yes | Yes | No  | Yes | Yes | Yes | Yes | 18/20 |
| Krebs 2014       | Yes | Yes | Yes | Yes | Yes | ?   | Yes | Yes | Yes | Yes | 19/20 |
| Matthias 2014    | Yes | Yes | Yes | Yes | Yes | No  | Yes | Yes | Yes | Yes | 18/20 |
| McCrorie 2015    | Yes | Yes | ?   | Yes | Yes | No  | Yes | Yes | Yes | Yes | 17/20 |
| Mueller 2017     | Yes | Yes | Yes | Yes | ?   | No  | Yes | Yes | ?   | Yes | 16/20 |
| Paterson 2016    | Yes | Yes | Yes | Yes | Yes | ?   | ?   | Yes | Yes | Yes | 18/20 |
| Penney 2017      | Yes | Yes | ?   | ?   | ?   | ?   | Yes | ?   | ?   | ?   | 13/20 |
| Rieb 2016        | Yes | Yes | Yes | Yes | Yes | ?   | Yes | ?   | Yes | Yes | 18/20 |
| Simmonds 2015    | Yes | Yes | ?   | Yes | Yes | ?   | Yes | Yes | ?   | ?   | 16/20 |
| St Marie 2016    | Yes | Yes | Yes | Yes | Yes | ?   | Yes | Yes | Yes | Yes | 19/20 |
| Vallerand 1 2009 | Yes | Yes | Yes | Yes | Yes | No  | No  | Yes | ?   | Yes | 15/20 |
| Vallerand 2 2010 | Yes | Yes | Yes | ?   | Yes | No  | No  | Yes | ?   | ?   | 13/20 |
| Wallace 2014     | Yes | Yes | Yes | Yes | Yes | No  | Yes | ?   | ?   | Yes | 16/20 |
| Warms 2005       | Yes | Yes | Yes | Yes | Yes | No  | No  | Yes | Yes | Yes | 16/20 |
| Zgierska 2016    | Yes | Yes | Yes | Yes | Yes | No  | Yes | Yes | Yes | Yes | 18/20 |
| Zheng 2013       | Yes | Yes | Yes | Yes | Yes | No  | ?   | Yes | Yes | Yes | 17/20 |
| Al Achkar 2017   | Yes | Yes | Yes | Yes | Yes | No  | Yes | Yes | Yes | Yes | 18/20 |
| Matthias 2017    | Yes | Yes | Yes | Yes | Yes | No  | Yes | Yes | Yes | Yes | 18/20 |
| Matthias 2018    | Yes | Yes | Yes | Yes | Yes | ?   | Yes | Yes | Yes | Yes | 19/20 |
| Smith 2018       | Yes | Yes | Yes | Yes | Yes | Yes | Yes | Yes | Yes | Yes | 20/20 |

**Legend 1 Critical Appraisal Skills Programme (CASP) questions scoring: Yes =2 ? (Can't Tell) = 1 No = 0**

Q1. Was there a clear statement of the aims of the research?

Q2. Is a qualitative methodology appropriate?

Q3. Was the research design appropriate to the aims of the research?

Q4. Was the recruitment strategy appropriate to the aims of the research?

Q5. Was the data collected in a way that addressed the research issue?

Q6. Has the relationship between researcher and participants been adequately considered?

Q7. Have ethical issues been taken into consideration?

Q8. Was the data analysis sufficiently rigorous?

Q9. Is there a clear statement of findings?

Q10. How valuable is the research?

# BMJ Open

## A systematic review and qualitative evidence synthesis of the experiences of people taking opioid medication for chronic non-malignant pain: a meta-ethnography

|                                 |                                                                                                                                                                                                                                                                                                                                                                                                                                                                                                                                                                                                |
|---------------------------------|------------------------------------------------------------------------------------------------------------------------------------------------------------------------------------------------------------------------------------------------------------------------------------------------------------------------------------------------------------------------------------------------------------------------------------------------------------------------------------------------------------------------------------------------------------------------------------------------|
| Journal:                        | <i>BMJ Open</i>                                                                                                                                                                                                                                                                                                                                                                                                                                                                                                                                                                                |
| Manuscript ID                   | bmjopen-2019-032988.R2                                                                                                                                                                                                                                                                                                                                                                                                                                                                                                                                                                         |
| Article Type:                   | Original research                                                                                                                                                                                                                                                                                                                                                                                                                                                                                                                                                                              |
| Date Submitted by the Author:   | 13-Dec-2019                                                                                                                                                                                                                                                                                                                                                                                                                                                                                                                                                                                    |
| Complete List of Authors:       | Nichols, Vivien; University of Warwick, Warwick Clinical Trials Unit, Warwick Medical School<br>Toye, Francine; Oxford University Hospitals NHS Trust, Physiotherapy Research Unit, Nuffield Orthopaedic Centre<br>Eldabe, Sam; The James Cook University Hospital<br>Sandhu, Harbinder; University of Warwick, Warwick Clinical Trials Unit, Warwick Medical School<br>Underwood, Martin; University of Warwick, Warwick Clinical Trials Unit, Warwick Medical School<br>Seers, Kate; University of Warwick, Warwick Research in Nursing, Division of Health Sciences, Warwick Medical School |
| <b>Primary Subject Heading</b>: | Qualitative research                                                                                                                                                                                                                                                                                                                                                                                                                                                                                                                                                                           |
| Secondary Subject Heading:      | Patient-centred medicine                                                                                                                                                                                                                                                                                                                                                                                                                                                                                                                                                                       |
| Keywords:                       | opioid, patients' views, QUALITATIVE RESEARCH, chronic non-malignant pain, meta-ethnography, qualitative evidence synthesis                                                                                                                                                                                                                                                                                                                                                                                                                                                                    |
|                                 |                                                                                                                                                                                                                                                                                                                                                                                                                                                                                                                                                                                                |

SCHOLARONE™  
Manuscripts



I, the Submitting Author has the right to grant and does grant on behalf of all authors of the Work (as defined in the below author licence), an exclusive licence and/or a non-exclusive licence for contributions from authors who are: i) UK Crown employees; ii) where BMJ has agreed a CC-BY licence shall apply, and/or iii) in accordance with the terms applicable for US Federal Government officers or employees acting as part of their official duties; on a worldwide, perpetual, irrevocable, royalty-free basis to BMJ Publishing Group Ltd ("BMJ") its licensees and where the relevant Journal is co-owned by BMJ to the co-owners of the Journal, to publish the Work in this journal and any other BMJ products and to exploit all rights, as set out in our [licence](#).

The Submitting Author accepts and understands that any supply made under these terms is made by BMJ to the Submitting Author unless you are acting as an employee on behalf of your employer or a postgraduate student of an affiliated institution which is paying any applicable article publishing charge ("APC") for Open Access articles. Where the Submitting Author wishes to make the Work available on an Open Access basis (and intends to pay the relevant APC), the terms of reuse of such Open Access shall be governed by a Creative Commons licence – details of these licences and which [Creative Commons](#) licence will apply to this Work are set out in our licence referred to above.

Other than as permitted in any relevant BMJ Author's Self Archiving Policies, I confirm this Work has not been accepted for publication elsewhere, is not being considered for publication elsewhere and does not duplicate material already published. I confirm all authors consent to publication of this Work and authorise the granting of this licence.

1  
2  
3  
4  
5  
6  
7  
8  
9  
10  
11  
12  
13  
14  
15  
16  
17  
18  
19  
20  
21  
22  
23  
24  
25  
26  
27  
28  
29  
30  
31  
32  
33  
34  
35  
36  
37  
38  
39  
40  
41  
42  
43  
44  
45  
46  
47  
48  
49  
50  
51  
52  
53  
54  
55  
56  
57  
58  
59  
60

# A systematic review and qualitative evidence synthesis of the experiences of people taking opioid medication for chronic non-malignant pain: a meta-ethnography

Mrs Vivien Nichols (1) Dr Francine Toyne (2) Professor Sam Eldabe (3) Dr Harbinder Sandhu (1) Professor Martin Underwood (1,) and Professor Kate Seers (4)

(1) Warwick Clinical Trials Unit  
Warwick Medical School  
University of Warwick, UK

(2) Physiotherapy Research Unit, Nuffield Orthopaedic Centre,  
Oxford University Hospitals NHS Foundation Trust  
Oxford, UK

(3) Academic Pain Department  
The James Cook University Hospital  
Middlesbrough, UK

(4) Warwick Research in Nursing  
Warwick Medical School  
University of Warwick, UK

Corresponding author:  
Mrs Vivien Nichols  
Warwick Clinical Trials Unit,  
Warwick Medical School,  
University of Warwick  
Coventry CV4 7AL  
Tel: 02476574652  
Email: [V.P.Nichols@warwick.ac.uk](mailto:V.P.Nichols@warwick.ac.uk)



## Abstract

*Objective* To review qualitative studies of the experience of taking opioid medication for Chronic Non-Malignant Pain (CNMP) or coming off them.

*Design* A qualitative evidence synthesis using meta-ethnography. We used a seven step approach from the methods of meta-ethnography.

*Data sources and eligibility criteria* We searched selected databases: Medline, Embase, AMED, CINAHL, PsycInfo, Web of Science and Scopus (Science citation index and Social Science Citation Index) for qualitative studies which gave patients' views of taking opioid medication for CNMP or of coming off them (June 2017, updated September 2018).

*Data extraction and synthesis* Papers were quality appraised using a Critical Appraisal Skills Programme (CASP) tool and Grading of Recommendations Assessment, Development and Evaluation working group - Confidence in Evidence from Reviews of Qualitative research (GRADE-CERQual) guidelines were applied. We identified concepts and iteratively abstracted these concepts into a line of argument.

*Results* We screened 2129 unique citations, checked 153 full texts and 31 met our review criteria. We identified five themes: 1) Reluctant users with little choice; 2) Understanding opioids: the good and the bad; 3) A therapeutic alliance: not always on the same page; 4) Stigma: feeling scared and secretive but needing support; and 5) The challenge of tapering or withdrawal. A new overarching theme of 'constantly balancing' emerged from the data.

*Conclusions* People taking opioids were constantly balancing tensions, not always wanting to take opioids, weighing the pros and cons of opioids but feeling they had no choice because of the pain. They frequently felt stigmatised, were not always 'on the

1  
2  
3 same page' as their health care professional and changes in opioid use were often  
4  
5 challenging.  
6  
7  
8  
9

10 **Key words:** Opioid, patients' views, qualitative research, chronic non-malignant  
11  
12 pain, meta-ethnography, qualitative evidence synthesis.  
13  
14

15  
16 Word count 4,971  
17  
18  
19  
20  
21

## 22 **Strengths and Limitations**

- 23  
24  
25 • To our knowledge this is the first qualitative evidence synthesis of patients'  
26 experiences of taking opioid medications.  
27
- 28  
29 • Meta-ethnography provides a thorough, systematic way of synthesising  
30 qualitative findings across multiple studies.  
31
- 32  
33 • Meta-ethnography provides the reviewer's interpretation of second order  
34 concepts.  
35
- 36  
37 • Using a GRADE-CERQual approach can assist in rating confidence in the  
38 review findings.  
39
- 40  
41 • Qualitative research that illuminates patients' perspectives can help to shape  
42 future approaches to opioid management.  
43  
44  
45  
46  
47  
48  
49

## 50 **Introduction**

51  
52  
53 Chronic non-malignant pain (CNMP) affects between an estimated 11% and 20% of  
54 the population in Europe and US and can impact heavily on people's quality of life <sup>1, 2</sup>  
55  
56 . Opioid medications are strong painkillers which have a well-established role in the  
57  
58  
59  
60

1  
2  
3 treatment of acute and cancer pain; they have also been advocated for CNMP. Opioids  
4  
5 can have distressing side effects as dosages increase such as; constipation, sedation,  
6  
7 drowsiness, nausea, decreased concentration and memory, or mood changes <sup>3</sup>. Most  
8  
9 people who use opioids develop tolerance to the painkilling effect of opioids, and  
10  
11 some become dependent on them. Studies have shown that high opioid usage can also  
12  
13 put people's lives at risk <sup>4</sup>. Despite this, the prescription of opioid medication for  
14  
15 CNMP has risen sharply in the higher income countries. Few studies of opioids have  
16  
17 shown effectiveness beyond 12 weeks follow up. Population surveys have shown  
18  
19 long-term use to be associated with increased side effects and limited pain relief <sup>3 5 6</sup>.  
20  
21 This synthesis of qualitative research was undertaken to underpin a process evaluation  
22  
23 for the Improving the Wellbeing of people with Opioid Treated CHronic pain (I-  
24  
25 WOTCH) study funded by the National Institute for Health Research. I-WOTCH is a  
26  
27 randomised controlled trial evaluating a multi-component education and patient  
28  
29 centred group intervention with a one-to-one tapering programme against a control of  
30  
31 an advice booklet with a relaxation CD. More information can be found in the main  
32  
33 study protocol <sup>7</sup> and process evaluation protocol <sup>8</sup>.  
34  
35 This qualitative evidence synthesis uses the methods of meta-ethnography to find out  
36  
37 what peoples' experiences are of both using opioids for CNMP and their attempts to  
38  
39 stop taking them.  
40  
41  
42  
43  
44  
45  
46  
47

## 48 **Methods**

49  
50  
51 We use Noblit and Hare's 7 stages of meta-ethnographic analysis <sup>9</sup>. We used the new  
52  
53 eMERGe reporting guidelines for meta-ethnography to structure our report <sup>10</sup> (*See*  
54  
55 *appendix 1*). The protocol is published in the international prospective register of  
56  
57  
58  
59  
60

1  
2  
3 systematic reviews (PROSPERO) registration number: CRD42017082418.

4  
5 <http://www.crd.york.ac.uk/PROSPERO>

6  
7  
8 *Step 1 Getting Started.*

9  
10 In order to address what has been labelled an opioid epidemic<sup>11</sup>, we need to  
11 understand people's experiences of being on opioids and of coming off them. Our  
12 team was chosen because of its expertise in primary qualitative research and  
13 qualitative evidence synthesis specific to chronic pain and opioid prescription.

14  
15  
16  
17  
18  
19 *Step 2 Deciding what is relevant.*

20 We undertook systematic electronic searches in June 2017 with a rerun in September  
21 2018, appraising relevant papers for quality using the Critical Appraisal Skills  
22 Programme (CASP) tool for qualitative research<sup>12</sup>. One researcher (VN) with the  
23 assistance of an academic librarian (SJ) searched seven electronic databases; Medline,  
24 Embase, AMED, CINAHL, PsycInfo Web of Science and Scopus (Science citation  
25 index and Social Science Citation Index) and forward citation searches. We used  
26 search terms, free text and MeSH terms for all opioid drugs as well as their generic  
27 names. We combined these with the MeSH term 'pain' and a wide range of MeSH  
28 terms and words to describe all types of qualitative research and its analysis based  
29 upon a search used by Toye, Seers and Barker in 2017<sup>13</sup>. The search was limited to  
30 those in English regarding humans with no cut-off date. Appendix 2 shows an  
31 example of our search terms.

32  
33  
34  
35  
36  
37  
38  
39  
40  
41  
42  
43  
44  
45  
46  
47  
48  
49 Unique citations were screened independently by 2 researchers (VN ST *see*  
50 *acknowledgements*) against our inclusion and exclusion criteria (see Box 1). Any  
51 disagreements were arbitrated by a third researcher (KS). Papers for full text reading  
52 were identified and read by two researchers. Quality was assessed using a CASP tool.  
53  
54  
55  
56  
57  
58  
59  
60 VN critically appraised the studies and KS independently appraised 10% for

consistency. The CASP scores are shown in table 1 and appendix 3. The GRADE-CERQual was used to appraise the reviewers' confidence in the research findings <sup>14</sup>,  
15.

**Box 1 Inclusion/Exclusion criteria**

**Included Studies**

Adults (18 years or older) taking or have taken opioid medication in the last five years  
Published in English in peer review journals with no time constraint  
Must relate to patient perspectives on using opioid medication for chronic non-malignant pain  
Must use qualitative methodology (any analytical approach) or mixed quantitative and qualitative methodology with qualitative findings reported separately  
Where studies include participants with differing medication we will include studies where the experience of those taking opioids is reported separately

**Excluded studies**

Paediatric studies (age less than 18 years)  
Theoretical or methodological papers  
Purely quantitative studies or mixed methods studies where the qualitative data are not presented separately  
Studies concerning active cancer  
Studies concerning headache  
Studies concerning any acute, or acute postoperative, pain  
Studies concerned only with health care professional or carer perspectives, or studies of mixed carer/ patient/ professional populations where patient perspectives are not presented separately  
Non- English language studies  
Theses or conference abstracts which are not peer reviewed

*Step 3 Reading the studies*

VN read all the studies and KS and FT read half of these papers each (so all were read twice) and all extracted the second order concepts independently. A second order concept is a researcher's interpretation of data in a primary qualitative study <sup>16</sup>. VN, KS and FT met to discuss and reach agreement, and compiled a spreadsheet of all of the concepts extracted from the papers

*Step 4 Determining how the studies are related?*

VN sorted the concepts into categories by looking for any similarities and differences across all the studies. VN, KS and FT discussed the categorisation of data on multiple occasions. To enable comparison across studies, VN recorded descriptive data about each study (see table 1)

1  
2  
3  
4  
5  
6  
7  
8  
9  
10  
11  
12  
13  
14  
15  
16  
17  
18  
19  
20  
21  
22  
23  
24  
25  
26  
27  
28  
29  
30  
31  
32  
33  
34  
35  
36  
37  
38  
39  
40  
41  
42  
43  
44  
45  
46  
47  
48  
49  
50  
51  
52  
53  
54  
55  
56  
57  
58  
59  
60

For peer review only

Table 1 Study characteristics with CASP and GRADE-CERQual relevance ratings

| Studies                                                                                                                                                | Country | Data collection / participants                          | Analytical Approach                      | Aims <i>Italics = verbatim quotes</i>                                                                                                                                                                                                                                                        | Morphine Equivalent Daily Dose mg/day (MED) | CASP score | Relevance |
|--------------------------------------------------------------------------------------------------------------------------------------------------------|---------|---------------------------------------------------------|------------------------------------------|----------------------------------------------------------------------------------------------------------------------------------------------------------------------------------------------------------------------------------------------------------------------------------------------|---------------------------------------------|------------|-----------|
| <b>1 Arnaert et al 2006<sup>17</sup></b><br>Response Phases in Methadone Treatment for Chronic Non-malignant Pain                                      | Canada  | Semi-structured interview<br>N=11<br>(4M/7F)            | Content analysis                         | <i>“...to develop an understanding and to gain knowledge about the beliefs of patients with CNMP who were taking methadone, and to explore what challenges, if any, existed that affected their beliefs when first starting methadone treatment as an activity in their personal lives.”</i> | None reported                               | 17/20      | P         |
| <b>2 Bergman et al 2013<sup>18</sup></b><br>Contrasting Tensions Between Patients and PCPs in Chronic Pain Management: A Qualitative Study             | USA     | In-depth interviews<br>N=26<br>(24m/2F)                 | Inductive thematic analysis              | <i>“... to develop a better understanding of the respective experiences, perceptions, and challenges both patients with chronic pain and PCPs face communicating with each other about pain management in the primary care setting.”</i>                                                     | None reported                               | 17/20      | P         |
| <b>3 Blake et al 2007<sup>19</sup></b><br>Experiences of patients requiring strong opioid drugs for chronic non-cancer pain: a patient initiated study | UK      | One focus group N=4 (2M/2F) and interviews N=10 (3M/5F) | Interpretative Phenomenological Analysis | <i>“...to determine the attitudes and experiences of patients receiving long-term strong opioid medication for chronic non-cancer pain in primary care.”</i>                                                                                                                                 | Individual opioid dosages                   | 19/20      | R         |
| <b>4 Brooks et al 2015<sup>20</sup></b><br>Exploring the lived experience of adults using prescription opioids to manage chronic noncancer pain        | Canada  | In-depth interviews<br>N=9 (4M/5F)                      | Interpretative Phenomenological Analysis | <i>“...to explore the lived experience of adults using prescription opioids to manage CNCP, focusing on how opioid medication affected their daily lives.”</i>                                                                                                                               | None reported                               | 17/20      | R         |

|                                                          |                                                                                                                                                                                    |        |                                                                               |                                                       |                                                                                                                                                                                                                                                                                                                                                                                                   |               |       |   |
|----------------------------------------------------------|------------------------------------------------------------------------------------------------------------------------------------------------------------------------------------|--------|-------------------------------------------------------------------------------|-------------------------------------------------------|---------------------------------------------------------------------------------------------------------------------------------------------------------------------------------------------------------------------------------------------------------------------------------------------------------------------------------------------------------------------------------------------------|---------------|-------|---|
| 1<br>2<br>3<br>4<br>5<br>6<br>7<br>8<br>9<br>10          | <b>5 Buchbinder et al 2014</b> <sup>21</sup> “Is there any way I can get something for my pain?” Patient strategies for requesting analgesics                                      | USA    | Audio recorded clinical encounters<br>N=74<br>(37M/37F)                       | Qualitative approach based on conversational analysis | <i>“We examined the direct and indirect means by which patients express a desire for analgesic medication.”</i>                                                                                                                                                                                                                                                                                   | None reported | 18/20 | I |
| 11<br>12<br>13<br>14<br>15<br>16<br>17<br>18<br>19       | <b>6 Chang Y-P et al 2011</b> <sup>22</sup> Use of Prescription Opioid Medication among Community-Dwelling Older Adults with Noncancer Chronic Pain                                | USA    | Face to face interview<br>N=21<br>(13M/8F)<br>≥65yrs                          | Content analysis, mixed methods                       | <i>“... to: (1) describe older adults’ patterns of adherence to their prescription opioid medication regimens and their reasons for these medication use patterns; and (2) examine the associations between adherence of prescription opioids, pain intensity, and pain interference on daily activity.”</i>                                                                                      | None reported | 16/20 | P |
| 20<br>21<br>22<br>23<br>24<br>25<br>26<br>27<br>28       | <b>7 Chang, F et al 2017</b> <sup>23</sup> Perceptions of Community-Dwelling Patients and Their Physicians on OxyContin® Discontinuation and the Impact on Chronic Pain Management | Canada | Pt interviews<br>N=13<br>1M/ 12F                                              | Not specified, no references given                    | <i>“... to explore the perceptions of patients with chronic pain and their physicians on OxyContin discontinuation and the impact that it had on chronic pain care and management.”</i>                                                                                                                                                                                                           | None reported | 16/20 | P |
| 29<br>30<br>31<br>32<br>33<br>34<br>35<br>36<br>37<br>38 | <b>8 Coyne et al 2015</b> <sup>24</sup> Assessment of a Stool Symptom Screener and Understanding the Opioid-Induced Constipation Symptom Experience                                | USA    | Cognitive interview semi structured think-aloud approach<br>N=66<br>(27M/39F) | Content analysis                                      | <i>“...to evaluate the content validity of the Stool Symptom Screener by assessing patient understanding of its items, patient ability to differentiate among response options, and patient perceptions about the use of a 2-week recall period for evaluating stool symptoms, BMs, and laxative use.<br/>- to evaluate how patients describe their constipation experience and to understand</i> | None reported | 17/20 | I |



|                                                                                                                                                                               |     |                                                                                                  |                                                                                                                 |                                                                                                                                                                                                                                              |                                                                         |       |   |
|-------------------------------------------------------------------------------------------------------------------------------------------------------------------------------|-----|--------------------------------------------------------------------------------------------------|-----------------------------------------------------------------------------------------------------------------|----------------------------------------------------------------------------------------------------------------------------------------------------------------------------------------------------------------------------------------------|-------------------------------------------------------------------------|-------|---|
|                                                                                                                                                                               |     |                                                                                                  |                                                                                                                 | <i>whether this differs between patients who frequently use laxatives and those who do not.</i>                                                                                                                                              |                                                                         |       |   |
| <b>9 Esquibel et al 2014</b> <sup>25</sup><br>Doctors and patients in pain: Conflict and collaboration in opioid prescription in primary care                                 | USA | In depth interviews with pts with CNCP receiving opioids and their physicians. N=21 pts (8M/13F) | Immersion/crystallization process to generate a thematic codebook. Mixed methods with some quant. data analysis | <i>"...to better understand the effects of COT [chronic opioid therapy] on the doctor-patient relationship."</i>                                                                                                                             | None reported                                                           | 20/20 | R |
| <b>10 Frank et al 2016</b> <sup>26</sup><br>Patients' Perspectives on Tapering of Chronic Opioid Therapy: A Qualitative Study                                                 | USA | Semi-structured interviews N=24 (11M/13F)                                                        | Team based, mixed inductive and deductive approach guided by the Health Belief Model                            | <i>"... to explore patients' perspectives on opioid tapering."</i>                                                                                                                                                                           | MED: Used algorithm<br><br>Median (IQR)<br>70 (30-165)<br>Range 15-1845 | 20/20 | R |
| <b>11 Green et al 2017</b> <sup>27</sup><br>Perpetuating stigma or reducing risk? Perspectives from naloxone consumers and pharmacists on pharmacy-based naloxone in 2 states | USA | 8 focus groups (only 2 with patients with chronic pain) N=15 (8M/7F)                             | Thematic analysis. Content analysis with a collaborative codebook development process                           | <i>"...to explore the attitudes of various stakeholders toward pharmacy-based naloxone and opioid medication safety and to capture the range of initial experiences with pharmacy naloxone in 2 states with pharmacy naloxone policies."</i> | None reported                                                           | 18/20 | P |

|                                                                                              |                                                                                                                                                                                                                       |     |                                                                                                                                    |                                                                                         |                                                                                                                                                                                                                                                                                                                                       |                                                                                              |       |   |
|----------------------------------------------------------------------------------------------|-----------------------------------------------------------------------------------------------------------------------------------------------------------------------------------------------------------------------|-----|------------------------------------------------------------------------------------------------------------------------------------|-----------------------------------------------------------------------------------------|---------------------------------------------------------------------------------------------------------------------------------------------------------------------------------------------------------------------------------------------------------------------------------------------------------------------------------------|----------------------------------------------------------------------------------------------|-------|---|
| 1<br>2<br>3<br>4<br>5<br>6<br>7<br>8<br>9<br>10<br>11                                        | <b>12 Hooten et al 2011</b> <sup>28</sup><br>Smoking Cessation and<br>Chronic Pain: Patient<br>and Pain Medicine<br>Physician Attitudes                                                                               | USA | N = 18<br>Interviews<br>N= 15 and<br>focus group<br>N=3 10M/8F                                                                     | Participatory<br>research,<br>mixed<br>methods -<br>Thematic and<br>content<br>analysis | <i>"...to determine the attitudes and beliefs of both patients and pain medicine physicians regarding smoking cessation interventions applied during pain therapy."</i>                                                                                                                                                               | MED - used<br>equianalgesic<br>conversion<br>software<br>programme<br>Mean ± SD<br>227 ± 356 | 18/20 | I |
| 12<br>13<br>14<br>15<br>16<br>17<br>18<br>19<br>20                                           | <b>13 Krebs et al 2014</b> <sup>29</sup><br>Barriers to Guideline-<br>Concordant Opioid<br>Management in Primary<br>Care—A Qualitative<br>Study                                                                       | USA | Semi<br>structured<br>interviews<br>N= 26<br>patients (14<br>PC<br>physicians)<br>13M/13F                                          | Immersion<br>crystallization<br>approach                                                | <i>"...to better understand primary care physicians' and patients' perspectives on recommended opioid management practices and to identify potential barriers and facilitators of guideline concordant opioid management in primary care."</i>                                                                                        | None reported                                                                                | 16/20 | P |
| 21<br>22<br>23<br>24<br>25<br>26<br>27<br>28<br>29<br>30                                     | <b>14 Matthias et al 2014</b> <sup>30</sup><br>Communicating<br>about opioids for<br>chronic pain: A<br>qualitative study of<br>patient attributions and<br>the influence of the<br>patient–physician<br>relationship | USA | Audio<br>Recordings<br>of primary<br>care visits<br>and Semi-<br>structured<br>interviews<br>after clinic<br>visit. N=30<br>26M/4F | Immersion/cry<br>stallization<br>approach                                               | <i>"...to advance understanding about communication about opioids by directly capturing clinical communication about opioids, as well as interviewing patients to gain insight into communication patterns and their broader relationships with their physicians, and how these relationships shape communication about opioids."</i> | None reported                                                                                | 18/20 | R |
| 31<br>32<br>33<br>34<br>35<br>36<br>37<br>38<br>39<br>40<br>41<br>42<br>43<br>44<br>45<br>46 | <b>15 McCrorie et al<br/>2015</b> <sup>31</sup> Understanding<br>long-term opioid<br>prescribing for non-<br>cancer pain in primary<br>care: a qualitative<br>study                                                   | UK  | Semi<br>structured<br>interviews<br>with patients<br>(focus<br>groups with                                                         | Grounded<br>approach for<br>thematic<br>analysis.<br>Constant<br>comparison             | <i>"... to understand the processes which bring about and perpetuate long-term prescribing of opioids for chronic, non-cancer pain. We interviewed patients and GPs about their experiences, beliefs and expectations of analgesia prescribing, to improve understanding of how</i>                                                   | None reported                                                                                | 17/20 | R |

|                                                                                                                                                                                                    |           |                                             |                                                                                                                                         |                                                                                                                                                                                                                                                                                                                                                                                                                                         |                                      |       |   |
|----------------------------------------------------------------------------------------------------------------------------------------------------------------------------------------------------|-----------|---------------------------------------------|-----------------------------------------------------------------------------------------------------------------------------------------|-----------------------------------------------------------------------------------------------------------------------------------------------------------------------------------------------------------------------------------------------------------------------------------------------------------------------------------------------------------------------------------------------------------------------------------------|--------------------------------------|-------|---|
|                                                                                                                                                                                                    |           | GPs) N=23<br>6M/17F                         |                                                                                                                                         | <i>problematic long-term opioid prescribing becomes established</i> ".                                                                                                                                                                                                                                                                                                                                                                  |                                      |       |   |
| <b>16 Mueller et al 2016</b> <sup>32</sup><br>Attitudes Toward Naloxone Prescribing in Clinical Settings: A Qualitative Study of Patients Prescribed High Dose Opioids for Chronic Non-Cancer Pain | USA       | Semi-structured interview<br>N=24<br>8M/16F | Ethnographic iterative methods. Inductive and deductive approaches                                                                      | <i>"This study assessed the knowledge and attitudes toward naloxone prescribing among non-cancer patients prescribed opioids in primary care."</i>                                                                                                                                                                                                                                                                                      | Inclusion criteria $\geq 100$ mg MED | 16/20 | I |
| <b>17 Paterson et al 2016</b> <sup>33</sup><br>Resisting Prescribed Opioids: A Qualitative Study of Decision Making in Patients Taking Opioids for Chronic Noncancer Pain                          | Australia | Qualitative individual interviews<br>N=20   | Constant comparison and decision making explored in depth and with a thematic analysis utilizing a published "Model of medicine-taking" | <i>"...to identify the varying influences on patients' decisions about their use of prescribed long-term opioids. The research questions are: 1) does this conceptual Model of medicine-taking apply to people taking prescribed opioids, 2) is the concept of "resistance" to medication useful in this context, and 3) does this concept lead to new insights which may improve communication and shared decision making between"</i> | None reported                        | 18/20 | P |
| <b>18 Penney et al 2016</b> <sup>34</sup><br>Provider and patient perspectives on opioids                                                                                                          | USA       | 11 Focus groups N=80 and                    | Thematic coding ref                                                                                                                     | <i>"...to identify the practical issues patients and providers face when accessing alternatives to</i>                                                                                                                                                                                                                                                                                                                                  | None reported                        | 13/20 | P |

|                                                                                                                                                                         |        |                                                        |                                                                                          |                                                                                                                                                                                                                                                                                                                                                                                         |                                       |       |   |
|-------------------------------------------------------------------------------------------------------------------------------------------------------------------------|--------|--------------------------------------------------------|------------------------------------------------------------------------------------------|-----------------------------------------------------------------------------------------------------------------------------------------------------------------------------------------------------------------------------------------------------------------------------------------------------------------------------------------------------------------------------------------|---------------------------------------|-------|---|
| and alternative treatments for managing chronic pain: a qualitative study                                                                                               |        | individual interviews<br>N=10<br>27M/63F               | Ryan, Bernard<br>2003                                                                    | <i>opioids, and how multiple parties view these issues."</i>                                                                                                                                                                                                                                                                                                                            |                                       |       |   |
| <b>19 Rieb et al 2016</b> <sup>35</sup><br>Withdrawal-associated injury site pain (WISP): a descriptive case series of an opioid cessation phenomenon                   | Canada | In person semi structured interviews<br>N=21<br>14M/7F | Deductive and inductive approaches. Use of survey and emergent interview themes          | <i>".... to document the existence and characteristics of this pain phenomenon that we have named withdrawal-associated injury site pain (WISP)."</i>                                                                                                                                                                                                                                   | Recalled dose before WISP             | 18/20 | P |
| <b>20 Simmonds et al 2015</b> <sup>36</sup> A Qualitative Study of Veterans on Long-Term Opioid Analgesics: Barriers and Facilitators to Multimodality Pain Management  | USA    | Semi structured focus groups x 3 N=25<br>17M/8F        | Grounded theory-informed approach. Framework provided by the theory of planned behaviour | <i>"...to examine barriers and facilitators to multimodality chronic pain care among veterans on high-dose opioid analgesics for chronic non-cancer pain."</i>                                                                                                                                                                                                                          | Inclusion criteria at least 50 mg MED | 16/20 | P |
| <b>21 St Marie et al 2016</b> <sup>37</sup> Primary care experiences of people who live with chronic pain and receive opioids to manage pain: A qualitative methodology | USA    | Semistructured interviews.<br>N=12 6M/6F               | Thematic and interpretive analyses                                                       | <i>"...to provide a deeper understanding of the experiences, issues, and challenges that people face who live with chronic pain and received opioids to help manage their pain in primary care. The following research questions were addressed: (a) What are the experiences of individuals who live with chronic pain and receive opioid pain medications to manage their pain in</i> | None reported                         | 19/20 | R |

|                                                                                                                                                                                      |     |                                                                               |                                                    |                                                                                                                                                                                                                                 |                        |       |   |
|--------------------------------------------------------------------------------------------------------------------------------------------------------------------------------------|-----|-------------------------------------------------------------------------------|----------------------------------------------------|---------------------------------------------------------------------------------------------------------------------------------------------------------------------------------------------------------------------------------|------------------------|-------|---|
|                                                                                                                                                                                      |     |                                                                               |                                                    | <i>primary care? (b) What have been their healthcare experiences as they strive to manage their pain?"</i>                                                                                                                      |                        |       |   |
| <b>22 Vallerand et al 1 2009</b> <sup>38</sup> Chronic Opioid Therapy for Nonmalignant Pain: The Patient’s Perspective. Part I— Life Before and After Opioid Therapy                 | USA | In depth serial interviews<br>N=22<br>6M/16F                                  | Phenomenologic study / Constant comparative method | <i>“...to examine the lived experience of adults receiving opioid therapy for relief of chronic non-malignant pain through the examination of data obtained through serial taper recorded interviews.”</i>                      | Range<br>22.5 to 3,200 | 14/20 | R |
| <b>23 Vallerand et al 2 2010</b> <sup>39</sup> Chronic Opioid Therapy for Non-malignant Pain: The Patient’s Perspective. Part II— Barriers to Chronic Opioid Therapy                 | USA | In depth serial narrative interviews<br>N=22<br>6M/16F                        | Phenomenologic study / Constant comparative method | <i>“...to elucidate the essence of the lived experience of patients receiving chronic opioid therapy for chronic non-malignant pain through examining their life narratives.”</i>                                               | None reported          | 13/20 | R |
| <b>24 Wallace et al 2014</b> <sup>40</sup> Voices that may not otherwise be heard: a qualitative exploration into the perspectives of primary care patients living with chronic pain | USA | Photovoice photos, Interviews<br>1st N=31 2nd N=25 , and focus groups<br>N=19 | Grounded theory                                    | <i>“...this study examined the utility of a combination of qualitative methods (Photovoice, one-on-one interviews, and focus groups) in examining the daily experiences of primary care patients living with chronic pain”.</i> | None reported          | 16/20 | R |
| <b>25 Warms et al 2005</b> <sup>41</sup> There are a few things you did not ask about my pain: writing on the margins of a survey                                                    | USA | Comments written in the margins of a questionnaire<br>N=797                   | Content analysis                                   | <i>“...to determine the characteristics of those who wrote comments [written in the margin of survey questionnaire] and to understand what was being communicated in their comments.”</i>                                       | None reported          | 16/20 | P |

|                                                                                                                                                                                                   |           |                                                             |                                               |                                                                                                                                                    |                                                                               |       |   |
|---------------------------------------------------------------------------------------------------------------------------------------------------------------------------------------------------|-----------|-------------------------------------------------------------|-----------------------------------------------|----------------------------------------------------------------------------------------------------------------------------------------------------|-------------------------------------------------------------------------------|-------|---|
|                                                                                                                                                                                                   |           |                                                             |                                               | *that comments were written in the margin is a potential limitation.                                                                               |                                                                               |       |   |
| <b>26 Zgierska et al 2016</b><br><sup>42</sup> Mindfulness Meditation-Based Intervention Is Feasible, Acceptable, and Safe for Chronic Low Back Pain Requiring Long-Term Daily Opioid Therapy     | USA       | Qual data on treatment satisfaction and experience<br>N= 17 | Qualitative analysis methods. Grounded theory | <i>"... to determine feasibility, acceptability, and safety of an MM-based intervention in patients with CLBP requiring daily opioid therapy."</i> | Inclusion criteria $\geq 30$ mg MED<br><br>Mean $\pm$ SD<br>166.9 $\pm$ 153.7 | 18/20 | I |
| <b>27 Zheng et al 2013</b><br><sup>43</sup> Chaos to Hope: A Narrative of Healing                                                                                                                 | Australia | In depth qual interviews (N=20)<br>10M/10F                  | Illness narratives. Thematic analysis         | <i>"...to investigate the progression of the illness and opioid journeys of people who are taking opioids for chronic non-cancer pain".</i>        | None reported                                                                 | 17/20 | P |
| <b>Rerun of search</b>                                                                                                                                                                            |           |                                                             |                                               |                                                                                                                                                    |                                                                               |       |   |
| <b>28 Al Achkar et al 2017</b> <sup>44</sup> Exploring perceptions and experiences of patients who have chronic pain as state prescription opioid policies change: a qualitative study in Indiana | USA       | N=9<br>3M/6F                                                | Inductive emergent thematic analysis          | <i>"...to evaluate the impact of Indiana's opioid prescription legislation on the patient experiences around pain management."</i>                 | None reported                                                                 | 18/20 | R |

|                                                                                                                                                                                                                                   |     |                 |                                                                                              |                                                                                                                                                                                                                                                                    |               |       |   |
|-----------------------------------------------------------------------------------------------------------------------------------------------------------------------------------------------------------------------------------|-----|-----------------|----------------------------------------------------------------------------------------------|--------------------------------------------------------------------------------------------------------------------------------------------------------------------------------------------------------------------------------------------------------------------|---------------|-------|---|
| <p><b>29 Matthias et al 2017</b><br/> <sup>45</sup> "I'm Not Gonna Pull the Rug out From Under You": Patient-Provider Communication About Opioid Tapering</p>                                                                     | USA | N=37<br>12M/25F | Inductive approach, constant comparison                                                      | <p><i>"...to understand communication processes related to opioid tapering."</i></p>                                                                                                                                                                               | None reported | 18/20 | R |
| <p><b>30 Matthias et al 2018</b><br/> <sup>46</sup> "I Was a Little Surprised": Qualitative Insights From Patients Enrolled in a 12-Month Trial Comparing Opioids With Nonopioid Medications for Chronic Musculoskeletal Pain</p> | USA | N=34<br>28M/6F  | Inductive approach, constant comparison                                                      | <p><i>"...to understand patients' experiences with the SPACE trial including their views and anticipated benefits of opioids, versus non -opioids, experiences with the intervention and to what extent expectations were met after completing the study."</i></p> | None reported | 19/20 | R |
| <p><b>31 Smith et al 2018</b> <sup>47</sup><br/>     Seeking Chronic Pain Relief: A Hermeneutic Exploration</p>                                                                                                                   | USA | N=15<br>4M/11F  | Concurrent embedded mixed methods design, Heideggerian hermeneutic phenomenological approach | <p><i>"This research presents an interpretation of the experience of seeking pain relief for a group of people taking opioid pain medications whose pain is not adequately controlled"</i></p>                                                                     | None reported | 20/20 | P |

Legend: GRADE-CERQual Relevance component: R= Relevant, P= Partial relevance, I= Indirect relevance, U=Uncertain relevance

IQR = Interquartile Range, SD = Standard Deviation

1  
2  
3  
4 *Step 5 Translating studies into each other*  
5

6  
7 Patterns and associations between categories were explored and all researchers felt  
8  
9 that a line of argument approach as defined by Noblit and Hare <sup>9</sup> would be the most  
10  
11 useful method to interpret the data.  
12

13 *Step 6 Synthesising Translations*  
14

15 Agreement was reached by clearly defining the over-arching or 3<sup>rd</sup> order concepts  
16  
17 arising from the data. A third order concept is the reviewers' interpretation of second  
18  
19 order concepts.  
20  
21

22 *Step 7 Expressing the synthesis*  
23

24 We developed a conceptual model to show how the themes related to each other in a  
25  
26 line of argument. (see figure 1)  
27  
28

29 *Insert figure 1 about here.*  
30

31 *Patient and Public Involvement*  
32  
33

34  
35 We did not involve patients or the public in our work.  
36  
37

38 *Results*  
39

40 Two reviewers VN and ST screened 2994 titles or abstracts (after the removal of  
41  
42 duplicates from the 5064 citations retrieved) and identified 153 full texts of interest.  
43  
44

45 Two reviewers VN and KS read these and 122 were excluded. Reasons are given in  
46  
47 the PRISMA flowchart, see figure 2. The reviewers agreed to include 31 studies. The  
48  
49 included studies were from US (23), Canada (4) UK (2), and Australia (2) and used a  
50  
51 range of qualitative methods.  
52  
53

54 We report the 4 facets of GRADE-CERQual for all papers. 1) Methodological 2)  
55  
56 Confidence 3) Relevance 4) Adequacy of data - See table 2 and 3 below.  
57  
58  
59  
60



Table 2 Confidence in review findings: GRADE-CERQual assessment

| Review findings                                           | Studies contributing (see table 1 column 1 for study number)                        | Methodological limitations (study number)     | Relevance (See table 1 end column)      | Coherence      | Adequacy of data |
|-----------------------------------------------------------|-------------------------------------------------------------------------------------|-----------------------------------------------|-----------------------------------------|----------------|------------------|
| Reluctant users with little choice                        | 1,3,4,5,6,7,17,18,21,22,26,27,30 (13 studies)                                       | 11 no concerns<br>2 minor concerns (18,22)    | 5 Relevant<br>6 Partial<br>2 Indirect   | No concerns    | No concerns      |
| Understanding opioids: the good the bad                   | 1,3,7,9,10,11,15,16,17,23,25,27,29 (13 studies)                                     | 12 no concerns<br>1 minor concerns (23)       | 6 Relevant<br>6 Partial<br>1 Indirect   | No concerns    | No concerns      |
| A therapeutic alliance: not always on the same page       | 1,2,3,4,5,7,9,10,11,13,14,15,16,17,18,19,20,21,22,23,24,25,26,28,29,31 (26 studies) | 23 no concerns<br>3 minor concerns (18,22,23) | 12 Relevant<br>11 Partial<br>3 Indirect | No concerns    | No concerns      |
| Stigma: feeling scared, and secretive but needing support | 1,2,3,4,7,9,10,14,16,17,18,20,21,22,23,24,27,28,31 (19 studies)                     | 16 no concerns<br>3 minor concerns (18,22,23) | 10 Relevant<br>8 Partial<br>1 Indirect  | No concerns    | No concerns      |
| The challenge of tapering/ withdrawal from opioids        | 7,10,18,19,30,31 (6 studies)                                                        | 5 no concerns<br>1 minor concerns (18)        | 2 Relevant<br>4 Partial                 | Minor concerns | Minor concerns   |

Table 3 GRADE-CERQual component scoring

|                            |                           |
|----------------------------|---------------------------|
| Methodological limitations | No or very minor concerns |
| Coherence                  | Minor concerns            |
| Adequacy of data           | Moderate concerns         |
|                            | Serious concerns          |
| Relevance                  | Relevant                  |
|                            | Partial                   |
|                            | Indirect                  |
|                            | Uncertain                 |

### *Synthesis of Findings*

We abstracted five themes from the 2<sup>nd</sup> order concepts. Table 4 below shows how each study contributed to each theme. We have illustrated each concept with exemplary quotations.

Table 4 Themes apparent in each study

| Author date | RU | U | TA | S | TW |
|-------------|----|---|----|---|----|
|-------------|----|---|----|---|----|

|    |                                  |           |          |           |          |           |
|----|----------------------------------|-----------|----------|-----------|----------|-----------|
| 1  | 1 Arnaert and Ciccotosto 2006    | X         | X        | X         | X        |           |
| 2  | 2 Bergman, Matthias et al 2013   |           |          | X         | X        |           |
| 3  | 3 Blake, Ruel et al 2007         | X         | X        | X         | X        |           |
| 4  | 4 Brooks, Unruh et al 2015       | X         |          | X         | X        |           |
| 5  | 5 Buchbinder, Wilbur et al 2014  | X         |          | X         |          |           |
| 6  | 6 Chang Y-P, Wray et al 2011     | X         |          |           |          |           |
| 7  | 7 Chang,F and Ibrahim,S 2017     | X         | X        | X         | X        | X         |
| 8  | 8 Coyne, Currie et al 2015       |           |          |           |          |           |
| 9  | 9 Esquibel and Borkan 2014       |           | X        | X         | X        |           |
| 10 | 10 Frank, Levy et al 2016        |           | X        | X         | X        | X         |
| 11 | 11 Green, Case et al 2017        |           | X        | X         |          |           |
| 12 | 12 Hooten, Vickers et al 2011    |           |          |           |          |           |
| 13 | 13 Krebs, Bergman et al 2014     |           |          | X         |          |           |
| 14 | 14 Matthias,Krebs et al 2013     |           |          | X         | X        |           |
| 15 | 15 McCrorie, Closs et al 2015    |           | X        | X         |          |           |
| 16 | 16 Mueller, Koester et al 2016   |           | X        | X         | X        |           |
| 17 | 17 Paterson, Ledgerwood 2016     | X         | X        | X         | X        |           |
| 18 | 18 Penney, Ritenbaugh et al 2016 | X         |          | X         | X        | X         |
| 19 | 19 Rieb, Norman et al 2016       |           |          | X         |          | X         |
| 20 | 20 Simmonds, Finley et al 2015   |           |          | X         | X        |           |
| 21 | 21 St Marie et al 2015           | X         |          | X         | X        |           |
| 22 | 22 Vallerand et al 1 2009        | X         |          | X         | X        |           |
| 23 | 23 Vallerand et al 2 2010        |           | X        | X         | X        |           |
| 24 | 24 Wallace et al 2014            |           |          | X         | X        |           |
| 25 | 25 Warms et al 2005 o            |           | X        | X         |          |           |
| 26 | 26 Zgierska et al 2016           | X         |          | X         |          |           |
| 27 | 27 Zheng et al 2013              | X         | X        |           | X        |           |
| 28 | <b>Studies from search rerun</b> | <b>RU</b> | <b>U</b> | <b>TA</b> | <b>S</b> | <b>TW</b> |
| 29 | 28 Al Achkar et al 2017          |           |          | X         | X        | X         |
| 30 | 29 Matthias et al 2017           |           | X        | X         |          | X         |
| 31 | 30 Matthias et al 2018           | X         |          |           |          |           |
| 32 | 31 Smith et al 2018              |           |          | X         | X        |           |

**Legend:**

RU = Reluctant users with little choice

U = Understanding about opioids: the good and the bad

TA = A therapeutic alliance: not always on the same page

S = Stigma: feeling scared, and secretive but needing support

TW = The challenges of tapering or withdrawal

X = theme present in paper

**1) Reluctant users with little choice**

This describes a resistance or hesitancy to take opioids mainly due to concerns about side effects or addiction, although they felt there were no other options available.

1  
2  
3 *“I don’t want to become addicted, if I’m going to become addicted then as far*  
4 *as I’m concerned I’m a druggie, so I might as well not be here anyway, so I*  
5 *don’t want to become addicted...” Blake et al Pg103*

6  
7  
8  
9  
10 *“I just didn’t want to go on them because I mean once you get on them that’s*  
11 *it, you’re sort of stuck on them. I didn’t want to take morphine at first because*  
12 *there was a girl that I went through one of the courses with and she always*  
13 *seemed really dopey and drugged up so it took them a long while*  
14 *to talk me to into taking the morphine because I didn’t want to be like that.*  
15  
16  
17  
18  
19  
20  
21 Zheng et al pg 1832

22  
23  
24 Some spoke of underusing or were keen to reduce their medications when possible.

25  
26 There was a dislike of being on long term medication and some thought that it would  
27  
28 not relieve their pain.

29  
30 *“I don’t want to do that [take more morphine]. I want to stay on as little as I*  
31 *possibly can because there might come a time when I need more and I don’t*  
32 *want to be on high doses. I’ve always tried to keep it at a minimum amount of*  
33 *tablets each day...” Blake et al Pg 105*

34  
35  
36  
37  
38  
39  
40 Even though some were reluctant there were other instances of dramatic improvement  
41  
42 in people’s lives. This then weighted their choice to stay on the opioids.

43  
44 *“I mean it is just like a miracle as far as I am concerned. It is like knowing it*  
45 *[the pain] is there but you have the instruments to prevent it from getting out*  
46 *and [be]coming a roaring demon.” Vallerand et al 1pg 170*

47  
48  
49  
50  
51 *“But opiates, that’s my way of life. There would be no life if I didn’t have this.*  
52 *And I thank God for them because without them I’d be...well I wouldn’t be. I*  
53 *just couldn’t go on. I would have committed suicide a long time ago. And I say*  
54 *that truthfully cause you could not live like that, with that constant, constant*  
55  
56  
57  
58  
59  
60

1  
2  
3 *pain. But, with the opiates it's made it possible to be able to have a part of a*  
4  
5 *life, you know."* Brooks et al pg 20  
6  
7  
8  
9

## 10 **2) Understanding opioids: the good and the bad**

11  
12  
13 This describes patients' knowledge or understanding about opioids which had  
14  
15 generally been acquired ad hoc and slowly over time, from pharmacists, patient  
16  
17 package inserts in their medication, leaflets, the internet, television programmes and  
18  
19 from doctors, especially doctors at the pain clinic.  
20  
21

22  
23 *"When you see it in the media, when you see it on the television, you think if*  
24  
25 *you're taking regular morphine you must be in a pretty bad way, you know."*  
26

27  
28 Blake et al Pg103

29  
30 *"I always ask before I go on a medication, what are the side effects, I was*  
31  
32 *told I may experience constipation; nothing else was explained to me."*  
33

34  
35 Paterson et al pg 721

36  
37 There was often poor knowledge about using opioids for chronic pain, and about  
38  
39 addiction, overdose risk and side effects.  
40

41  
42 *"There's not too much education about it [overdose]... When I first started*  
43  
44 *taking it [the opioid medication], no one told me about OD[overdose]or*  
45  
46 *anything about that. Because I was taking it not [as] prescribed...I was just*  
47  
48 *like when I felt pain I would just take like five or six of them or whatever. Then*  
49  
50 *at the end, I'd run out."* Mueller et al pg 279  
51

52  
53 Patients often had to defend their usage and this added to their stress especially when  
54  
55 they felt their healthcare professionals lacked an understanding of the place for  
56  
57 opioids in the treatment of CNMP or were cautious about using them.  
58  
59  
60

1  
2  
3 *“The concern is that if they increase my opioid dosage, I could stop breathing.*

4  
5 *It’s ridiculous.”* Frank et al Pg1841

6  
7 *“There are still a lot of doctors out there that are against it. They think it is*  
8  
9 *bad. Bad medicine. Bad practice.”* Vallerand et al 2 pg 129

10  
11  
12 In contrast, some people felt well informed which either produced more concern or  
13  
14 gave the patients confidence in their opioid regime.

15  
16  
17 *“... and from what I’ve read up, because I like to, sort of, keep on top of*  
18  
19 *things, that it’s an opium based drug, so you will build up some tolerance and*  
20  
21 *you will build up [becomes tearful] And you will potentially become sort of*  
22  
23 *addicted to it, if you like.”* McCrorie et al pg 3

24  
25  
26 *“Under Dr A [pain clinic] I’ve learnt more. And my concern has been, well it*  
27  
28 *was initially the possibility of addiction, but she has assured me that I’m not*  
29  
30 *showing no signs of addiction at all. I may have some withdrawal problems”*  
31  
32  
33 Paterson et al Pg 721

### 36 37 **3) A therapeutic alliance: not always on the same page**

38  
39 This describes a therapeutic alliance or the relationship between patients and their  
40  
41 health care providers which was considered important.

42  
43 Overall there was a feeling that HCPs and patients were often ‘not on the same page’  
44  
45 about opioid usage.

46  
47  
48 *“My family doctor...does not want me to be dependent on heavy pain meds, so*  
49  
50 *I am intensely miserable 99% of the time.”* Warms et al pg 252

51  
52  
53 Some patients felt they were not listened to and were frustrated by a lack of empathy  
54  
55 from physicians regarding their pain experience.

56  
57  
58 *“I frequently have difficulty with the residents (doctors in training) explaining*  
59  
60 *why these drugs, this many drugs...Finally Dr. [family physician] wrote a note*

1  
2  
3 *in my file – stop harassing [participant’s name]. This is what she gets and why*  
4 *she gets it. And they did stop but it was inconvenient. For instance, they would*  
5 *not prescribe me three months at a time. I would be dispensed one month at a*  
6 *time. And for someone who had been taking the same drugs for 10 years I*  
7 *found that condescending. ” Brooks et al pg 18*

14 A reluctance to prescribe from GPs and pharmacists and the use of opioid contracts or  
15 a restriction of medication were often considered punitive.

19 *“It kind of made me feel like I was doing something wrong, which I wasn’t,*  
20 *but I signed a contract. You know, what would I be without my meds?” Krebs*  
21 *et al pg 1152*

26 *“And I told my doctor that, that I wanted so I could sleep through the night.*  
27 *And now he, well, I’ll give you 10, but it’s got to last. Like he treats me like a*  
28 *drug addict.” Penney et al pg 6*

33 The healthcare system often worked against a therapeutic alliance with lack of  
34 continuity or care or frequent visits which fed into mistrust. Patients complained that  
35 provider turnover affected their ability to receive individualised care; conversations  
36 about pain and treatment options often had to be started over again from scratch.

42 *“I don’t have the same doctor long enough to know”. Bergman et al pg 1693*

44 However having blood or urine tests for levels of opioids and regular checks were  
45 seen by some as being cared for.

49 *“I would say, ‘I have this agreement and you don’t have to sign it if you don’t*  
50 *want to, but I would like to go over it with you. These are suggestions because*  
51 *this medication is addictive, it is dangerous, and I just want to make sure*  
52 *you’re aware.’ I think if you really want to make it where people are not*

1  
2  
3 *hostile, say they have to have a urine test every 6 months, everybody, and that*  
4  
5 *'it's a policy because we care about all of you.'*" Krebs et al pg 1152  
6  
7

8 Some talked of the need for good relationships built on trust, shared decision making  
9  
10 and knowledgeable specialists who communicate well.  
11

12 *"I wouldn't say I researched it to that depth, you know, I read a little bit*  
13 *about, and asked a lot of questions at my doctor, and then we decided."*  
14

15  
16  
17 Paterson pg 722  
18

#### 20 21 **4) Stigma: feeling scared and secretive but needing support** 22

23 This describes feelings of stigma and fear which people expressed directly in relation  
24 to their opioid usage. This includes peoples' negative attitudes from family, medical  
25 professionals and work colleagues which lead to them feeling stigmatised and judged  
26 for taking opioids.  
27  
28  
29  
30  
31

32 *"So I'm constantly trying to clean up because I think people are going to*  
33 *judge me. 'Oh, because she's on all this medication, ooh, she can't look after*  
34 *her children.'"* Paterson et al pg 724  
35  
36  
37

38  
39 *"As soon as you mention to someone that you are on pain medication it's, 'Oh*  
40 *my god, you've got to get off it.' It is viewed as weak. Somehow I am weak for*  
41 *being on this medication."* Vallerand et al 2 pg 128  
42  
43  
44  
45

46 To protect themselves some chose to keep their opioids a secret.  
47

48 *"But you know, after 2 years of pain, you are physically exhausted, mentally*  
49 *exhausted and depressed. So, I take my medication and I hide it at the bottom*  
50 *of my drawer. It's my secret life. It's always a secret, and I've got to hide it*  
51 *and not tell anyone."* Vallerand et al 1 pg 169  
52  
53  
54  
55  
56  
57  
58  
59  
60

1  
2  
3 Some people made a conscious decision about who they could tell and who they  
4  
5 couldn't due to negative reactions. Relationships suffered when patients felt  
6  
7 unsupported.  
8  
9

10 *"My son told me I was a drug addict. He did. He really did. He was to the*  
11 *point, he didn't know what he could do for me. It really was that bad."*

12  
13  
14 Vallerand et al 2 pg 128

15  
16  
17 *"I had originally told my sister and she was very concerned. Then she said,*  
18 *'As long as you don't stay on them.' She thought it was OK if I did it for a*  
19 *while but as long as I didn't stay on them. So I just sort of never told her. And*  
20 *she never asked."* Vallerand et al 2 pg 128  
21  
22  
23  
24  
25

26 Although some seemed confident in using opioids, mostly people spoke about fears  
27  
28 such as; addiction and uncontrolled pain. Feeling supported validated their choices  
29  
30 and experiences and lessened some of their fears and concerns.  
31  
32

33 *"And at the end, my partner says—we sat down there and he goes 'Stay on*  
34 *them.' ...I've always spoke to my partner, and if he's been unsure— we've*  
35 *both been unsure, we've both gone into the doctor together to ask questions."*

36  
37  
38  
39  
40 Zheng et al pg 1834

41  
42 *"my wife wanted me to take this medication. She was like: let's go for it."*

43  
44  
45 Arnaert et al pg 26  
46  
47

## 48 **5) The challenge of tapering/withdrawal from opioids**

49

50 Four papers <sup>23, 26 44, 45</sup> explore patients' experiences of tapering or withdrawing as  
51  
52 their main content. Two further papers <sup>34, 35</sup> addressed it as a more peripheral issue  
53  
54 (see CERQual ratings in table 2). This describes the challenges and profound effects  
55  
56 of tapering or withdrawing from opioids.  
57  
58

59 Tapering and withdrawing from opioids could be challenging and provoke anxiety.  
60



1  
2  
3 *“I have a tremendous fear in a doctor saying I want you to taper off the*  
4 *methadone and get totally off the methadone with no alternative whatsoever. I*  
5 *think that would be an irrational decision by a doctor, and I probably*  
6 *wouldn't take that advice.”* Frank et al pg1842  
7  
8  
9  
10

11  
12 This anxiety could be alleviated by support from a trusted health care provider or  
13  
14 other person.  
15

16  
17 *“The best thing about it was that nobody acted like I was a bad person*  
18 *because I was on these medications and was having to be going through this*  
19 *really slow process of coming down off of them.”* Frank et al pg1843  
20  
21  
22

23  
24 Successful tapering was described as a collaborative agreement between HCP and  
25  
26 patient.  
27

28  
29 *“She put me down to 2 and a half [pills per day]. Then she said, okay, we'll*  
30 *go down to half a pill. I told her I didn't think that just 2 a day would do it,*  
31 *and she said okay, we'll try 2 and a half, are you agreeable with that? I said*  
32 *that's fine. I mean, we can discuss stuff. It doesn't have to be a disagreement*  
33 *because we can talk about it. It's not an argument. We're 2 adults having a*  
34 *conversation, figuring out what to do.”* Matthias et al 2017 pg 1369  
35  
36  
37  
38  
39  
40

41  
42 However, not all people experienced joint decision making when tapering  
43

44  
45 *“I just don't feel that he's understanding. he don't seem to care what I'm*  
46 *saying, because he's lowering it down anyway, even though I've told*  
47 *him...that I didn't agree with it being lowered.”* Matthias et al 2017 pg 1369  
48  
49  
50

51  
52 For those in the USA, prescribing policies, advising clinicians to monitor and  
53  
54 decrease opioid use, and the legislation to enforce these policies made those taking  
55  
56 opioids feel as if they were ‘a public health problem’. This could have a negative  
57  
58  
59  
60

1  
2  
3 effect on the doctor patient relationship and leave the patient feeling disempowered.

4  
5 This was compounded when opioids had been withdrawn by legislation.<sup>23, 44</sup>

6  
7  
8 *“I have to struggle, suffer, to make the next the next time that I can get my*  
9  
10 *medicine. And I don’t think that’s fair to me because if I can take my medicine*  
11 *a little more regularly , I would be able to do more.....I don’t think that the*  
12 *law, people, politicians, or anybody should be able to tell anybody that’s in*  
13 *pain what type of medicine they can take.” Al Achkar et al pg 7*

14  
15  
16  
17  
18  
19 *“That kinda got me mad, cause I thought well you know. . .they’re taking it off*  
20 *the market because of people abusing it. . .It’s not fair to us, you know. . . . I*  
21 *think the government was wrong to. . . pull them off the market, you know,*  
22 *because of people abusing them, no like they weren’t looking at the people*  
23 *that need them. . .But I think it’s really unfair that people that really do need*  
24 *them can’t get them.” Chang and Ibrahim 2017 pg 3*

### 34 **Overarching theme: Constantly balancing**

35  
36  
37 After considering the five themes, an overarching theme emerged - ‘Constant  
38  
39 balancing’. The theme *Reluctant users with little choice* describes the need to balance  
40  
41 the pros and cons of starting opioids and the need to balance having pain with their  
42  
43 hesitancy to use opioids.

44  
45  
46 *“I don’t really like being on a lot of tablets, I’ve never been a tablet person,*  
47  
48 *um. . . but I mean I can’t have the pain either so it’s one evil outdoing the*  
49  
50 *other evil.* Paterson et al pg 723

51  
52  
53 Studies describe balancing the dose for pain management with their side effects to  
54  
55 allow them to function. Participants constantly weighed up the effects on their life;  
56  
57 dealing with an internal conflict of unresolved pain versus necessary medication,  
58  
59  
60

1  
2  
3 being opioid free versus having uncontrolled pain and balancing other stressors  
4  
5 against opioid dose changes.  
6

7  
8 *“If you’re going to be able to walk, and you take one pain pill so you can walk*  
9  
10 *and live life, you’re going to do it, even though you may not like it.”* Penney et  
11  
12 al pg 6

13  
14 The theme *Stigma feeling scared and secretive but needing support*, describes the  
15  
16 need to balance their hopes for relief with fear of side effects, and also to balance  
17  
18 whether or not to disclose their opioid use with the risk of being labelled a ‘drug  
19  
20 seeker’ versus having unrelieved pain.  
21  
22

23  
24 *“I do it for my own protection by not telling them because I see how they react*  
25  
26 *by reading something in the paper...and it’s just their ignorance. And I don’t*  
27  
28 *have time. Well they know what’s going on but they don’t get it to this day. So*  
29  
30 *you have to pick your battles...”* Brooks et al pg 19

31  
32  
33 The theme *Understanding opioids; the good and the bad*, showed people had different  
34  
35 levels of understanding but weighed up their decisions and trade-offs against their  
36  
37 pain relief.  
38  
39

40  
41 *“It’s, it’s got a good and bad side, morphine. ....When I take it, it works*  
42  
43 *really, really well but it makes you feel rather sick, umm, rather spaced out*  
44  
45 *and thinking wise, umm, it outcomes more on the other, do I want to be sick or*  
46  
47 *do I want to cry with pain? So I’d rather be sick but it is a very, very good*  
48  
49 *painkiller.”* Blake et al pg 105

50  
51 The therapeutic alliance theme showed that often it was evident that they were ‘not on  
52  
53 the same page’ with them balancing the advice from their doctors with what they  
54  
55 wanted.  
56  
57  
58  
59  
60

1  
2  
3                    “[My provider] said you could die any time, and my husband and I said, well,  
4  
5                    we realize that, but because of the pain, you know, we were willing to take that  
6  
7                    risk that I would die from the narcotic medication.” Frank et al pg 1841  
8  
9

10 It also meant that there were multiple barriers to the process of decreasing opioids due  
11  
12 to this constant balancing act which is described in the theme *the challenge of*  
13  
14 *tapering/withdrawal from opioids*.  
15

16  
17                    “I will tell her, if I do come off this medication, there are going to be  
18  
19                    consequences. I can’t walk as often, I can’t stand as long, I just can’t do it....”  
20  
21                    Vallerand et al 1 pg 169  
22  
23

## 24 25 Discussion

26  
27 Our five themes were; 1) Reluctant users with little choice; 2) Understanding opioids:  
28  
29 the good the bad; 3) A therapeutic alliance: not always on the same page; 4) Stigma:  
30  
31 feeling scared and secretive but needing support; and 5) The challenge of tapering or  
32  
33 withdrawal. An overarching theme of ‘constantly balancing’ emerged from the data.  
34  
35 These themes all had positive and negative aspects although the negative were more  
36  
37 prevalent by far.  
38  
39

40 We present a line of argument of how complex it is for the patient to balance  
41  
42 decisions at every stage of their journey. First their reluctance to start taking opioids  
43  
44 but feeling they had no option. Patients are given opioids for CNMP often as a last  
45  
46 resort when all other treatment has failed and their lives are so profoundly affected  
47  
48 that they talk of a desperation, that they would literally ‘try anything’. Patients spoke  
49  
50 about not being given any detailed information about opioids and that they had  
51  
52 learned more about them over time from different sources. This varied understanding  
53  
54 about opioids and their side effects can affect the decisions that people make. Patients  
55  
56 reported the need to keep the dosage of opioids as low as possible and often that they  
57  
58  
59  
60

1  
2  
3 were not at risk of addiction or overdose if they were taking them as prescribed. Even  
4  
5 those who felt they may be addicted sometimes viewed this as an acceptable trade-off  
6  
7 for pain relief. Our findings indicate that patient desperation combined with  
8  
9 inadequate information from healthcare professionals could trigger the prescription of  
10  
11 opioids. It may be that delivering accurate information about the potential side effects  
12  
13 and limited efficacy of opioids for chronic pain management would reduce the use of  
14  
15  
16  
17 opioids.

18  
19 Our findings demonstrate that the stigma surrounding how patients feel about being  
20  
21 on opioids can be compounded by the judgements of others. Although patients often  
22  
23 describe themselves in terms of 'reluctant users', if they experienced the benefits of  
24  
25 opioids through decreased pain and thus increased function they are often too scared  
26  
27 to reduce opioids and return to a life of potentially unmanaged pain.  
28  
29  
30  
31

32  
33 Our findings suggest that clinicians and patients with chronic pain are not always 'on  
34  
35 the same page'. The theme *a therapeutic alliance* captures the positives, but also the  
36  
37 tensions and mismatches of perceptions held by healthcare providers who are  
38  
39 attempting to limit dose escalation, and patients who may view constant dose  
40  
41 escalation as an acceptable trade-off for reducing relentless pain. The therapeutic  
42  
43 alliance is a robust theme supported by 26 of the 31 studies included. This is not  
44  
45 surprising as patients rely on their health care professionals to prescribe opioids. This  
46  
47 finding resonates with qualitative evidence syntheses (QES) exploring the experience  
48  
49 of patients<sup>13</sup> and healthcare professionals<sup>48</sup> It seems clear that joint decision -making  
50  
51 is important for appropriate healthcare; however, our findings suggests that there are  
52  
53 instances of mistrust on both sides. A QES exploring clinicians experience of  
54  
55 prescribing opioids for chronic pain demonstrate that the process of prescribing  
56  
57  
58  
59  
60

1  
2  
3 opioids is not straightforward for clinicians who face a complex decision - 'Should I  
4 shouldn't I' prescribe opioids for chronic non-malignant pain<sup>48</sup>. They also  
5 demonstrate that clinicians must walk a fine line to balance the pros and cons of  
6  
7  
8  
9  
10  
11  
12  
13  
14  
15  
16  
17  
18  
19  
20  
21  
22  
23  
24  
25  
26  
27  
28  
29  
30  
31  
32  
33  
34  
35  
36  
37  
38  
39  
40  
41  
42  
43  
44  
45  
46  
47  
48  
49  
50  
51  
52  
53  
54  
55  
56  
57  
58  
59  
60

opioids whilst also maintaining patient trust. This suggests that both patients and HCPs find dealing with prescribing/taking opioids for CNMP is complex and involves balancing and trade-offs.

Current guidance from Royal College of Anaesthetists in the UK and The Centers for Disease Control and Prevention in the US advocate a preference for non-opioid therapies in the treatment of CNMP<sup>49</sup>. If a clinician feels that opioids are indicated, then they recommend a low dose for a short duration which should be assessed for effectiveness and regularly evaluated for benefits and harms. All but four studies in this review are between 2005 and 2017, prior to these guidelines. Opioid contracts in some areas of the USA and Canada can make patients feel stigmatised and judged, this effect can be moderated by a good therapeutic relationship, and reframing these as agreements rather than contracts<sup>50</sup>. Some physicians may view contracts/agreements as necessary to guard against uncontrolled dose escalation, repeated demands for replacement of lost or misplaced medication, subversion and illicit opioid intake. This finding resonates with Toye et al (2017) who describe the moral boundary work and social guardianship that clinicians associate with opioid prescription. Our findings suggest that this role does may not contribute to an effective therapeutic partnership.

#### Limitations of this study

A majority of the studies are from the United States and the findings need to be taken in the context of its health and social care systems. Most of the articles in this qualitative synthesis were published or the research was conducted, before the impact

1  
2  
3 of the opioid epidemic became clear to regulators and the medical profession. Some  
4  
5 papers discuss using opioids as a last resort, although the opioid epidemic, especially  
6  
7 in the US indicates that the threshold for prescribing opioids was low until recent  
8  
9 initiatives to discourage prescribing long-term opioids for chronic pain<sup>51</sup>. Not all  
10  
11 studies gave morphine equivalent data so we cannot determine what proportion were  
12  
13 taking high, medium or low doses. We acknowledge that our interpretation of the  
14  
15 data might have been influenced by the current, much more critical perception of  
16  
17 opioid use for chronic non-malignant pain. Further evidence is needed to find out if  
18  
19 these themes are universal for developed countries or whether there are important  
20  
21 differences.  
22  
23  
24

25  
26 Our conceptual framework highlights patients need to constantly balance and to  
27  
28 consider the pros and cons of taking opioids. This can have a profound effect on  
29  
30 peoples' relationships with their family, friends and health care providers and their  
31  
32 perceived standing in the community which is reflected in their careful balancing of  
33  
34 disclosure. The therapeutic alliance and having a clear understanding of all the  
35  
36 positive and negative aspects of opioids were important factors that underpinned their  
37  
38 ability to maintain this fragile balance. This balance might also affect a person's  
39  
40 desire or ability to taper or withdraw from opioids.  
41  
42  
43

44  
45 The GRADE-CERQual ratings (table 2) revealed we had confidence in the findings  
46  
47 with only a few minor concerns and no moderate or serious concerns.  
48  
49

### 50 **Conclusions and recommendations for future research**

51  
52 The first meta-ethnography on this topic revealed a constant balancing and a life in  
53  
54 flux in an effort to maintain participation in life and relationships. These are important  
55  
56 features of opioid use for CNMP. To maintain this delicate balance they often need  
57  
58 support from family or clinicians, however this balance can be upset by the feeling of  
59  
60

1  
2  
3 being judged by this same potential support system or peers and society at large  
4  
5 through the media. The therapeutic alliance with healthcare professionals, the extent  
6  
7 of people's understanding as well as the stigma attached to opioid use need to be  
8  
9 navigated by people who are often reluctant to be on opioids in the first place.  
10  
11  
12

### 13 **Authors Contribution**

14  
15  
16  
17 VN and KS contributed to the review concept and design as part of the I-WOTCH  
18  
19 process evaluation team. HS, SE, MU and KS were involved in the design of the  
20  
21 IWOTCH study. VN, KS and FT screened search results or extracted data, conducted  
22  
23 the analysis and synthesis. All authors contributed to data interpretation, revised the  
24  
25 final manuscript critically for important intellectual content and appraised the final  
26  
27 manuscript. VN prepared the final manuscript and will be the corresponding author.  
28  
29  
30  
31  
32

### 33 **Funding**

34  
35 This project was funded by the National Institute for Health Research, Health  
36  
37 Technology Assessment (project number 14/224/04). The views and opinions  
38  
39 expressed therein are those of the authors and do not necessarily reflect those of the  
40  
41 HTA, NIHR, NHS or the Department of Health. Ethics approval was provided by  
42  
43 Yorkshire and the Humber South Yorkshire Research Ethics committee on 13-9-16.  
44  
45  
46  
47

### 48 **Declaration of competing interests**

49  
50 KS has undertaken other meta-ethnographies and was on the NIHR HS&DR Board  
51  
52 until January 2018.

53  
54 SE is investigator on a number of NIHR and industry sponsored studies. He received  
55  
56 travel expenses for speaking at conferences from the professional organisations. SE  
57  
58 consults for Medtronic, Abbott, Boston Scientific and Mainstay Medical, none in  
59  
60



1  
2  
3 relation to opioids. SE is chair of the BPS Science and Research Committee. SE is  
4  
5 deputy Chair of the NIHR CRN Anaesthesia Pain and Perioperative Medicine  
6  
7 National Specialty Group. SE's department has received fellowship funding from  
8  
9 Medtronic as well as nurse funding from Abbott.

10  
11  
12 HS is director of Health Psychology Services Ltd, providing psychological services  
13  
14 for a range of health related conditions.

15  
16  
17 MU was Chair of the NICE accreditation advisory committee until March 2017 for  
18  
19 which he received a fee. He is chief investigator or co-investigator on multiple  
20  
21 previous and current research grants from the UK National Institute for Health  
22  
23 Research, Arthritis Research UK and is a co-investigator on grants funded by the  
24  
25 Australian NHMRC. He is an NIHR Senior Investigator. He has received travel  
26  
27 expenses for speaking at conferences from the professional organisations hosting the  
28  
29 conferences. He is a director and shareholder of Clinvivo Ltd that provides electronic  
30  
31 data collection for health services research. He is part of an academic partnership with  
32  
33 Serco Ltd related to return to work initiatives. He is a co-investigator on a study  
34  
35 receiving support in kind from Stryker Ltd. He has accepted honoraria for teaching  
36  
37 from CARTA. He is an editor of the NIHR journal series, and a member of the NIHR  
38  
39 Journal Editors Group, for which he receives a fee.  
40  
41  
42  
43  
44  
45  
46

47 Data Availability Statement: Data is available on reasonable request.

## 48 49 50 **Acknowledgements**

51  
52 We would like to thank Samantha Johnson an academic librarian who helped with the  
53  
54 electronic searches and Dr Stephanie Tierney who helped to screen the citations.  
55  
56

## 57 58 **References**

1. Breivik H, Collett B, Ventafridda V, et al. Survey of chronic pain in Europe: prevalence, impact on daily life, and treatment. *Eur J Pain*2006;10:287-333.
2. Nahin RL. Estimates of pain prevalence and severity in adults: United States, 2012. *J Pain*2015;16:769-80.
3. Els C, Jackson TD, Kunyk D, et al. Adverse events associated with medium- and long-term use of opioids for chronic non-cancer pain: an overview of Cochrane Reviews. *Cochrane Database of Systematic Reviews*2017.
4. Gomes T, Tadrus M, Mamdani MM, et al. The burden of opioid-related mortality in the united states. *JAMA Network Open*2018;1:e180217.
5. Furlan AD, Sandoval JA, Mailis-Gagnon A, et al. Opioids for chronic noncancer pain: a meta-analysis of effectiveness and side effects. *CMAJ*2006;174:1589-94.
6. Busse JW, Wang L, Kamaleldin M, et al. Opioids for Chronic Noncancer Pain: A Systematic Review and Meta-analysis. *JAMA*2018;320:2448-60.
7. Sandhu HK, Abraham C, Alleyne S, et al. Testing a support programme for opioid reduction for people with chronic non-malignant pain: the I-WOTCH randomised controlled trial protocol. *BMJ Open*2019;9:e028937.
8. Nichols VP, Abraham C, Eldabe S, et al. Process evaluation protocol for the I-WOTCH study: an opioid tapering support programme for people with chronic non-malignant pain. *BMJ Open*2019;9:e028998.
9. Noblit GW and Hare RD. Meta-ethnography: Synthesizing qualitative studies. sage, 1988.
10. France EF, Cunningham M, Ring N, et al. Improving reporting of meta-ethnography: The eMERGe reporting guidance. *J Adv Nurs*2019;75:1126-39.
11. Manchikanti L, Helm S, 2nd, Fellows B, et al. Opioid epidemic in the United States. *Pain Physician*2012;15:ES9-38.
12. Critical Appraisal Skills Programme (CASP). Oxford: Public Health Resource Unit, 2006.
13. Toye F, Seers K and Barker KL. Meta-ethnography to understand healthcare professionals' experience of treating adults with chronic non-malignant pain. *BMJ Open*2017;7:e018411.
14. Lewin S, Booth A, Glenton C, et al. Applying GRADE-CERQual to qualitative evidence synthesis findings: introduction to the series. *Implement Sci*2018;13:2.
15. Lewin S, Bohren M, Rashidian A, et al. Applying GRADE-CERQual to qualitative evidence synthesis findings-paper 2: how to make an overall CERQual assessment of confidence and create a Summary of Qualitative Findings table. *Implement Sci*2018;13:10.
16. Schutz AJCP. Collected Papers. Vol. 1. The Hague: Martinus Nijhoff.. 1964. 1962;2.
17. Arnaert A and Ciccotosto G. Response phases in methadone treatment for chronic nonmalignant pain. *Pain Management Nursing*2006;7:23-30.
18. Bergman AA, Matthias MS, Coffing JM, et al. Contrasting tensions between patients and PCPs in chronic pain management: a qualitative study. *Pain Medicine*2013;14:1689-97.
19. Blake S, Ruel B, Seamark C, et al. Experiences of patients requiring strong opioid drugs for chronic non-cancer pain: a patient-initiated study. *British Journal of General Practice*2007;57:101-8.

- 1
  - 2
  - 3
  - 4
  - 5
  - 6
  - 7
  - 8
  - 9
  - 10
  - 11
  - 12
  - 13
  - 14
  - 15
  - 16
  - 17
  - 18
  - 19
  - 20
  - 21
  - 22
  - 23
  - 24
  - 25
  - 26
  - 27
  - 28
  - 29
  - 30
  - 31
  - 32
  - 33
  - 34
  - 35
  - 36
  - 37
  - 38
  - 39
  - 40
  - 41
  - 42
  - 43
  - 44
  - 45
  - 46
  - 47
  - 48
  - 49
  - 50
  - 51
  - 52
  - 53
  - 54
  - 55
  - 56
  - 57
  - 58
  - 59
  - 60
20. Brooks EA, Unruh A and Lynch ME. Exploring the lived experience of adults using prescription opioids to manage chronic noncancer pain. *Pain Research & Management*2015;20:15-22.
21. Buchbinder M, Wilbur R, McLean S, et al. "Is there any way I can get something for my pain?" Patient strategies for requesting analgesics. *Patient Education and Counseling*2015;98:137-43.
22. Chang Y-P, Wray LO, Sessanna L, et al. Use of prescription opioid medication among community-dwelling older adults with noncancer chronic pain. *Journal of Addictions Nursing (Taylor & Francis Ltd)*2011;22:19-24.
23. Chang F and Ibrahim S. Perceptions of community-dwelling patients and their physicians on OxyContin ® discontinuation and the impact on chronic pain management. *Pain Research & Management*2017;2017:11.
24. Coyne KS, Currie BM, Holmes WC, et al. Assessment of a Stool Symptom Screener and Understanding the Opioid-Induced Constipation Symptom Experience. *Patient*2015;8:317-27.
25. Esquibel AY and Borkan J. Doctors and patients in pain: Conflict and collaboration in opioid prescription in primary care. *Pain*2014;155:2575-82.
26. Frank JW, Levy C, Matlock DD, et al. Patients' Perspectives on Tapering of Chronic Opioid Therapy: A Qualitative Study. *Pain Medicine*2016;17:1838-47.
27. Green TC, Case P, Fiske H, et al. Perpetuating stigma or reducing risk ? Perspectives from naloxone consumers and pharmacists on pharmacy-based naloxone in 2 states. *Journal of the American Pharmacists Association*2017;57:S19-+.
28. Hooten WM, Vickers KS, Shi Y, et al. Smoking cessation and chronic pain: patient and pain medicine physician attitudes. *Pain Practice*2011;11:552-63.
29. Krebs EE, Bergman AA, Coffing JM, et al. Barriers to guideline-concordant opioid management in primary care-a qualitative study. *Journal of Pain*2014;15:1148-55.
30. Matthias MS, Krebs EE, Bergman AA, et al. Communicating about opioids for chronic pain: A qualitative study of patient attributions and the influence of the patient-physician relationship. *European Journal of Pain*2014;18:835-43.
31. McCrorie C, Closs SJ, House A, et al. Understanding long-term opioid prescribing for non-cancer pain in primary care: a qualitative study. *BMC Family Practice*2015;16:121.
32. Mueller SR, Koester S, Glanz JM, et al. Attitudes Toward Naloxone Prescribing in Clinical Settings: A Qualitative Study of Patients Prescribed High Dose Opioids for Chronic Non-Cancer Pain. *Journal of General Internal Medicine*2017;32:277-83.
33. Paterson C, Ledgerwood K, Arnold C, et al. Resisting Prescribed Opioids: A Qualitative Study of Decision Making in Patients Taking Opioids for Chronic Noncancer Pain. *Pain Medicine*2016;17:717-27.
34. Penney LS, Ritenbaugh C, DeBar LL, et al. Provider and patient perspectives on opioids and alternative treatments for managing chronic pain: a qualitative study. *BMC Family Practice*2017;17.
35. Rieb LM, Norman WV, Martin RE, et al. Withdrawal-associated injury site pain (WISP): A descriptive case series of an opioid cessation phenomenon. *Pain*2016;157:2865-74.
36. Simmonds MJ, Finley EP, Vale S, et al. A qualitative study of veterans on long-term opioid analgesics: barriers and facilitators to multimodality pain management. *Pain Medicine*2015;16:726-32.

- 1
  - 2
  - 3
  - 4
  - 5
  - 6
  - 7
  - 8
  - 9
  - 10
  - 11
  - 12
  - 13
  - 14
  - 15
  - 16
  - 17
  - 18
  - 19
  - 20
  - 21
  - 22
  - 23
  - 24
  - 25
  - 26
  - 27
  - 28
  - 29
  - 30
  - 31
  - 32
  - 33
  - 34
  - 35
  - 36
  - 37
  - 38
  - 39
  - 40
  - 41
  - 42
  - 43
  - 44
  - 45
  - 46
  - 47
  - 48
  - 49
  - 50
  - 51
  - 52
  - 53
  - 54
  - 55
  - 56
  - 57
  - 58
  - 59
  - 60
37. St Marie B. Primary care experiences of people who live with chronic pain and receive opioids to manage pain: A qualitative methodology. *Journal of the American Association of Nurse Practitioners*2016;28:429-35.
38. Vallerand A and Nowak L. Chronic Opioid Therapy for Nonmalignant Pain: The Patient's Perspective. Part I-Life Before and After Opioid Therapy. *Pain Management Nursing*2009;10:165-72.
39. Vallerand A and Nowak L. Chronic opioid therapy for nonmalignant pain: the patient's perspective. Part II--Barriers to chronic opioid therapy. *Pain Management Nursing*2010;11:126-31.
40. Wallace LS, Wexler RK, McDougle L, et al. Voices that may not otherwise be heard: A qualitative exploration into the perspectives of primary care patients living with chronic pain. *Journal of Pain Research*2014;7:291-99.
41. Warms CA, Marshall HM, Hoffman AJ, et al. There are a few things you did not ask about my pain: writing on the margins of a survey questionnaire. *Rehabilitation Nursing*2005;30:248-56.
42. Zgierska AE, Burzinski CA, Cox J, et al. Mindfulness Meditation-Based Intervention Is Feasible, Acceptable, and Safe for Chronic Low Back Pain Requiring Long-Term Daily Opioid Therapy. *Journal of Alternative & Complementary Medicine*2016;22:610-20.
43. Zheng Z, Paterson C, Ledgerwood K, et al. Chaos to hope: a narrative of healing. *Pain Medicine*2013;14:1826-38.
44. Al Achkar M, Revere D, Dennis B, et al. Exploring perceptions and experiences of patients who have chronic pain as state prescription opioid policies change: a qualitative study in Indiana. *BMJ open*2017;7:e015083.
45. Matthias MS, Johnson NL, Shields CG, et al. "I'm Not Gonna Pull the Rug out From Under You": Patient-Provider Communication About Opioid Tapering. *Journal of Pain*2017;18:1365-73.
46. Matthias MS, Donaldson MT, Jensen AC, et al. "I Was a Little Surprised": Qualitative Insights From Patients Enrolled in a 12-Month Trial Comparing Opioids With Nonopioid Medications for Chronic Musculoskeletal Pain. *Journal of Pain*2018;19:1082-90.
47. Smith CL, Severtsen B, Vandermause R, et al. Seeking Chronic Pain Relief: A Hermeneutic Exploration. *Pain Management Nursing*2018.
48. Toye F, Seers K, Tierney S, et al. A qualitative evidence synthesis to explore healthcare professionals' experience of prescribing opioids to adults with chronic non-malignant pain. *BMC Fam Pract*2017;18:94.
49. CDC. CDC Guideline for Prescribing Opioids for Chronic Pain: (2019, accessed 12-4-19).
50. Tobin DG, Keough Forte K and Johnson McGee S. Breaking the pain contract: A better controlled-substance agreement for patients on chronic opioid therapy. *Cleve Clin J Med*2016;83:827-35.
51. Schieber LZ, Guy GP, Jr., Seth P, et al. Trends and Patterns of Geographic Variation in Opioid Prescribing Practices by State, United States, 2006-2017. *JAMA Netw Open*2019;2:e190665.

Figure 1 Concept model

Figure 2 PRISMA flow diagram

Figure 1 Concept model of the experiences of people taking opioid medication for chronic non-malignant pain

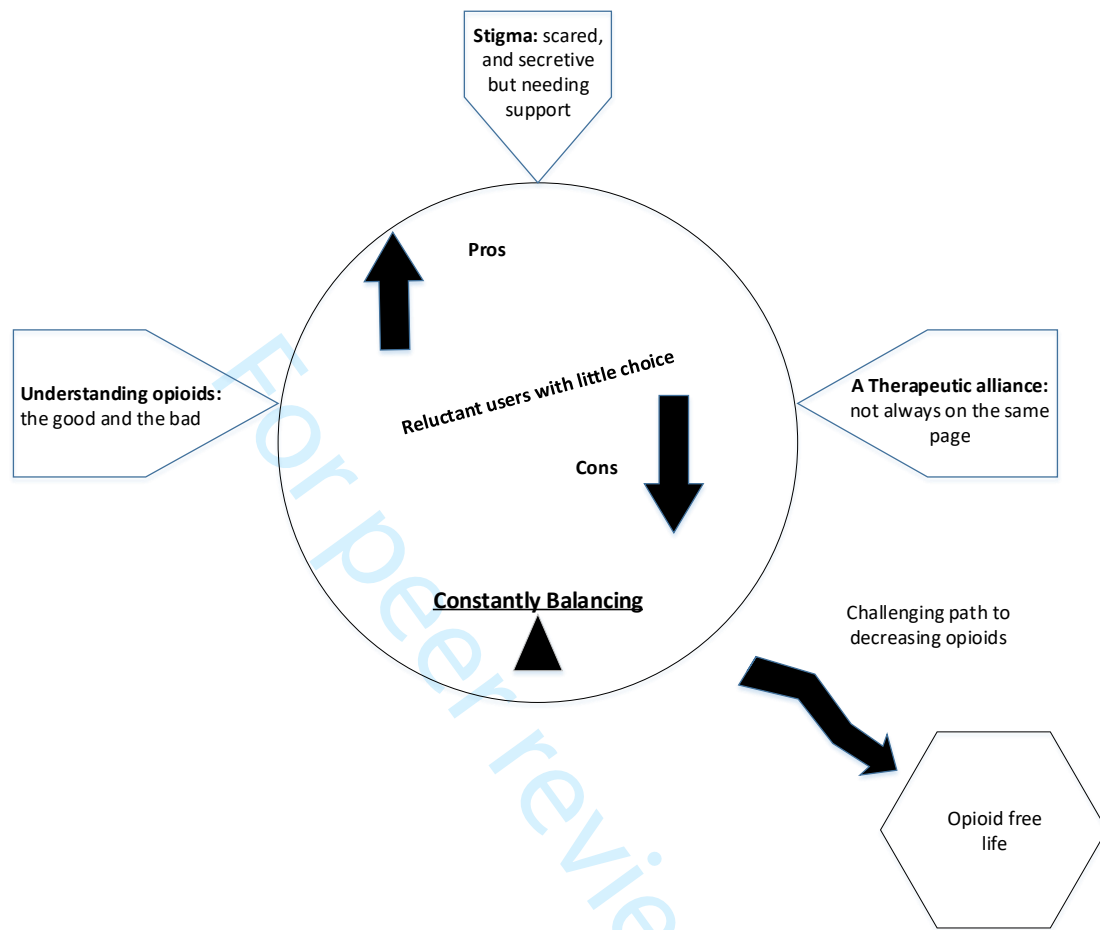



**Figure 2: PRISMA Flow Diagram**



**Initial search June 2017 and updated search Sept 2018 reported.**

The search dates for the rerun could be specified in some databases, but not all. Therefore some papers were found in both searches. These twice found duplicate papers were removed at this point\*

From: Moher D, Liberati A, Tetzlaff J, Altman DG, The PRISMA Group (2009). Preferred Reporting Items for Systematic Reviews and Meta-Analyses: The PRISMA Statement. PLoS Med 6(7): e1000097. doi:10.1371/journal.pmed1000097

## Appendix 1 The eMERGe meta-ethnography reporting guidance

| <b>Numbered criteria headings with explanatory reporting criteria</b>                                                                                                                                                                                                                                                                                                                  | <b>Page</b> |
|----------------------------------------------------------------------------------------------------------------------------------------------------------------------------------------------------------------------------------------------------------------------------------------------------------------------------------------------------------------------------------------|-------------|
| <b>Phase 1—Selecting meta-ethnography and getting started</b>                                                                                                                                                                                                                                                                                                                          |             |
| <i>Introduction</i>                                                                                                                                                                                                                                                                                                                                                                    |             |
| 1 Rationale and context for the meta-ethnography<br>Describe the gap in research or knowledge to be filled by the meta-ethnography, and the wider context of the meta-ethnography                                                                                                                                                                                                      | 4           |
| 2 Aim(s) of the meta-ethnography<br>Describe the meta-ethnography aim(s)                                                                                                                                                                                                                                                                                                               | 4           |
| 3 Focus of the meta-ethnography<br>Describe the meta-ethnography review question(s) (or objectives)                                                                                                                                                                                                                                                                                    | 4           |
| 4 Rationale for using meta-ethnography<br>Explain why meta-ethnography was considered the most appropriate qualitative synthesis methodology                                                                                                                                                                                                                                           | 4           |
| <b>Phase 2—Deciding what is relevant</b>                                                                                                                                                                                                                                                                                                                                               |             |
| <i>Methods</i>                                                                                                                                                                                                                                                                                                                                                                         |             |
| 5 Search strategy<br>Describe the rationale for the literature search strategy                                                                                                                                                                                                                                                                                                         | 4/5         |
| 6 Search processes<br>Describe how the literature searching was carried out and by whom                                                                                                                                                                                                                                                                                                | 4/5         |
| 7 Selecting primary studies<br>Describe the process of study screening and selection, and who was involved                                                                                                                                                                                                                                                                             | 5           |
| <i>Findings</i>                                                                                                                                                                                                                                                                                                                                                                        |             |
| 8 Outcome of study selection<br>Describe the results of study searches and screening                                                                                                                                                                                                                                                                                                   | 16          |
| <b>Phase 3—Reading included studies</b>                                                                                                                                                                                                                                                                                                                                                |             |
| <i>Methods</i>                                                                                                                                                                                                                                                                                                                                                                         |             |
| 9 Reading and data extraction approach<br>Describe the reading and data extraction method and processes                                                                                                                                                                                                                                                                                | 6           |
| <i>Findings</i>                                                                                                                                                                                                                                                                                                                                                                        |             |
| 10 Presenting characteristics of included studies<br>Describe characteristics of the included studies                                                                                                                                                                                                                                                                                  | Table1      |
| <b>Phase 4—Determining how studies are related</b>                                                                                                                                                                                                                                                                                                                                     |             |
| <i>Methods</i>                                                                                                                                                                                                                                                                                                                                                                         |             |
| 11 Process for determining how studies are related<br>Describe the methods and processes for determining how the included studies are related: - Which aspects of studies were compared AND- How the studies were compared                                                                                                                                                             | 6           |
| <i>Findings</i>                                                                                                                                                                                                                                                                                                                                                                        |             |
| 12 Outcome of relating studies<br>Describe how studies relate to each other                                                                                                                                                                                                                                                                                                            | 17          |
| <b>Phase 5—Translating studies into one another</b>                                                                                                                                                                                                                                                                                                                                    | 16          |
| <i>Methods</i>                                                                                                                                                                                                                                                                                                                                                                         |             |
| 13 Process of translating studies<br>Describe the methods of translation: - Describe steps taken to preserve the context and meaning of the relationships between concepts within and across studies- Describe how the reciprocal and refutational translations were conducted- Describe how potential alternative interpretations or explanations were considered in the translations | 16          |
| <i>Findings</i>                                                                                                                                                                                                                                                                                                                                                                        |             |
| 14 Outcome of translation<br>Describe the interpretive findings of the translation.                                                                                                                                                                                                                                                                                                    | 17 to 28    |
| <b>Phase 6—Synthesizing translations</b>                                                                                                                                                                                                                                                                                                                                               |             |
| <i>Methods</i>                                                                                                                                                                                                                                                                                                                                                                         |             |
| 15 Synthesis process<br>Describe the methods used to develop overarching concepts (“synthesised translations”)Describe how potential alternative interpretations or explanations were considered in the synthesis                                                                                                                                                                      | 16          |
| <i>Findings</i>                                                                                                                                                                                                                                                                                                                                                                        |             |
| 16 Outcome of synthesis process<br>Describe the new theory, conceptual framework, model, configuration, or interpretation of data developed from the synthesis                                                                                                                                                                                                                         | Figure 1    |
| <b>Phase 7—Expressing the synthesis</b>                                                                                                                                                                                                                                                                                                                                                |             |

|                                                                                                                                                                                                                                                                                                                                                                                                        |             |
|--------------------------------------------------------------------------------------------------------------------------------------------------------------------------------------------------------------------------------------------------------------------------------------------------------------------------------------------------------------------------------------------------------|-------------|
| <p><i>Discussion</i></p> <p>17 Summary of findings<br/>Summarize the main interpretive findings of the translation and synthesis and compare them to existing literature</p>                                                                                                                                                                                                                           | 28 to<br>30 |
| <p>18 Strengths, limitations, and reflexivity<br/>Reflect on and describe the strengths and limitations of the synthesis:<br/>- Methodological aspects—for example, describe how the synthesis Findings were influenced by the nature of the included studies and how the meta-ethnography was conducted.<br/>- Reflexivity—for example, the impact of the research team on the synthesis findings</p> | 30          |
| <p>19 Recommendations and conclusions<br/>Describe the implications of the Synthesis</p>                                                                                                                                                                                                                                                                                                               | 31          |

Reference: France et al. BMC Medical Research Methodology (2019) 19:25  
<https://doi.org/10.1186/s12874-018-0600-0>

For peer review only



## Appendix 2 – example of search terms

Scopus

((TITLE-ABS-KEY(buprenorphine or fentanyl or heroin or hydromorphone or methadone or morphine or opium or oxycodone or pentazocine or tramadol or opiate\* or opioid\*) OR TITLE-ABS-KEY(suboxone or bunavail or zubsolv or dipipanone or diconal or wellconal or diamorphine or duragesic or fentora or actiq or abstral or recivit or effentora or instanyl or pecfent or oxycontin or roxicodone or oramorph or papaveretum or omnopon or fortral )OR TITLE-ABS-KEY(osegon or "talwin nx" or pethidine or meperidine or demerol or tapentadol or nucynta or palexia or tapal or ultram or zytram))) and ((TITLE-ABS-KEY(qualitative w/5 (theor\* or study or studies or research or analysis)) OR TITLE-ABS-KEY(ethno\* or emic or etic or phenomenolog\* or hermeneutic\* or heidegger\* or husserl\* or colaizzi\* or giorgi\* or glaser or strauss or (van and kaam\*) or (van and manen) or ricoeur or spiegelberg\* or merleau) OR TITLE-ABS-KEY(constant w/3 compar\*) OR TITLE-ABS-KEY(focus w/3 group\*) OR TITLE-ABS-KEY( grounded w/3 (theor\* or study or studies or research or analysis)) OR TITLE-ABS-KEY(narrative w/3 analysis) OR TITLE-ABS-KEY(discourse w/3 analysis) OR TITLE-ABS-KEY( (lived or life) w/3 experience\*) OR TITLE-ABS-KEY((theoretical or purposive) w/3 sampl\*) OR TITLE-ABS-KEY("field note\*" or "field record\*" or fieldnote\*) OR TITLE-ABS-KEY(participant\* w/3 observ\*) OR TITLE-ABS-KEY("action research") OR TITLE-ABS-KEY("digital adj record\*" or audiorecord\* or taperecord\* or videorecord\* or videotap\* ) OR TITLE-ABS-KEY(cooperative and inquir\*) OR TITLE-ABS-KEY(co and operative and inquir\*) OR TITLE-ABS-KEY(co-operative and inquir\*) OR TITLE-ABS-KEY( ("semi-structured" or semistructured or unstructured or structured) w/3 interview\*) OR TITLE-ABS-KEY((Informal or in-depth or indepth or "in depth") w/3 interview\*) OR TITLE-ABS-KEY(("face-to-face" or "face to face") w/3 interview\*) OR TITLE-ABS-KEY("ipa" or "interpretive phenomenological analysis") OR TITLE-ABS-KEY(social and construct\*) OR TITLE-ABS-KEY("appreciative inquiry") OR TITLE-ABS-KEY(poststructural\* or "post structural\*" or post-structural\*) OR TITLE-ABS-KEY( postmodern\* or "post modern\*" or post-modern\*) OR TITLE-ABS-KEY(feminis\*) OR TITLE-ABS-KEY(humanistic or existential or experiential))) and (TITLE-ABS-KEY(pain))

1  
2  
3  
4  
5  
6  
7  
8  
9  
10  
11  
12  
13  
14  
15  
16  
17  
18  
19  
20  
21  
22  
23  
24  
25  
26  
27  
28  
29  
30  
31  
32  
33  
34  
35  
36  
37  
38  
39  
40  
41  
42  
43  
44  
45  
46  
47  
48  
49  
50  
51  
52  
53  
54  
55  
56  
57  
58  
59  
60

For peer review only

## Appendix 3 Critical Appraisal Skills Programme (CASP) Quality appraisal tool scores

| Study            | Q1  | Q2  | Q3  | Q4  | Q5  | Q6  | Q7  | Q8  | Q9  | Q10 | Score |
|------------------|-----|-----|-----|-----|-----|-----|-----|-----|-----|-----|-------|
| Arnaert 2006     | Yes | Yes | Yes | Yes | ?   | No  | Yes | Yes | Yes | Yes | 17/20 |
| Bergman 2013     | Yes | Yes | Yes | Yes | Yes | No  | Yes | ?   | Yes | Yes | 17/20 |
| Blake 2007       | Yes | Yes | Yes | Yes | Yes | ?   | Yes | Yes | Yes | Yes | 19/20 |
| Brooks 2015      | Yes | Yes | Yes | Yes | Yes | No  | Yes | ?   | Yes | Yes | 17/20 |
| Buchbinder 2015  | Yes | Yes | Yes | Yes | Yes | No  | Yes | Yes | Yes | Yes | 18/20 |
| Chang F 2017     | Yes | Yes | Yes | Yes | Yes | No  | ?   | ?   | Yes | Yes | 16/20 |
| Chang Y-P 2011   | Yes | Yes | Yes | Yes | Yes | No  | Yes | ?   | ?   | Yes | 16/20 |
| Coyne 2015       | Yes | Yes | Yes | Yes | Yes | No  | Yes | ?   | Yes | Yes | 17/20 |
| Esquibel 2014    | Yes | Yes | Yes | Yes | Yes | Yes | Yes | Yes | Yes | Yes | 20/20 |
| Frank 2016       | Yes | Yes | Yes | Yes | Yes | Yes | Yes | Yes | Yes | Yes | 20/20 |
| Green 2017       | Yes | Yes | Yes | Yes | Yes | No  | Yes | Yes | Yes | Yes | 18/20 |
| Hooten 2011      | Yes | Yes | Yes | Yes | Yes | No  | Yes | Yes | Yes | Yes | 18/20 |
| Krebs 2014       | Yes | Yes | Yes | Yes | Yes | ?   | Yes | Yes | Yes | Yes | 19/20 |
| Matthias 2014    | Yes | Yes | Yes | Yes | Yes | No  | Yes | Yes | Yes | Yes | 18/20 |
| McCrorie 2015    | Yes | Yes | ?   | Yes | Yes | No  | Yes | Yes | Yes | Yes | 17/20 |
| Mueller 2017     | Yes | Yes | Yes | Yes | ?   | No  | Yes | Yes | ?   | Yes | 16/20 |
| Paterson 2016    | Yes | Yes | Yes | Yes | Yes | ?   | ?   | Yes | Yes | Yes | 18/20 |
| Penney 2017      | Yes | Yes | ?   | ?   | ?   | ?   | Yes | ?   | ?   | ?   | 13/20 |
| Rieb 2016        | Yes | Yes | Yes | Yes | Yes | ?   | Yes | ?   | Yes | Yes | 18/20 |
| Simmonds 2015    | Yes | Yes | ?   | Yes | Yes | ?   | Yes | Yes | ?   | ?   | 16/20 |
| St Marie 2016    | Yes | Yes | Yes | Yes | Yes | ?   | Yes | Yes | Yes | Yes | 19/20 |
| Vallerand 1 2009 | Yes | Yes | Yes | Yes | Yes | No  | No  | Yes | ?   | Yes | 15/20 |
| Vallerand 2 2010 | Yes | Yes | Yes | ?   | Yes | No  | No  | Yes | ?   | ?   | 13/20 |
| Wallace 2014     | Yes | Yes | Yes | Yes | Yes | No  | Yes | ?   | ?   | Yes | 16/20 |
| Warms 2005       | Yes | Yes | Yes | Yes | Yes | No  | No  | Yes | Yes | Yes | 16/20 |
| Zgierska 2016    | Yes | Yes | Yes | Yes | Yes | No  | Yes | Yes | Yes | Yes | 18/20 |
| Zheng 2013       | Yes | Yes | Yes | Yes | Yes | No  | ?   | Yes | Yes | Yes | 17/20 |
| Al Achkar 2017   | Yes | Yes | Yes | Yes | Yes | No  | Yes | Yes | Yes | Yes | 18/20 |
| Matthias 2017    | Yes | Yes | Yes | Yes | Yes | No  | Yes | Yes | Yes | Yes | 18/20 |
| Matthias 2018    | Yes | Yes | Yes | Yes | Yes | ?   | Yes | Yes | Yes | Yes | 19/20 |
| Smith 2018       | Yes | Yes | Yes | Yes | Yes | Yes | Yes | Yes | Yes | Yes | 20/20 |

**Legend 1 Critical Appraisal Skills Programme (CASP) questions scoring: Yes =2 ? (Can't Tell) = 1 No = 0**

Q1. Was there a clear statement of the aims of the research?

Q2. Is a qualitative methodology appropriate?

Q3. Was the research design appropriate to the aims of the research?

Q4. Was the recruitment strategy appropriate to the aims of the research?

Q5. Was the data collected in a way that addressed the research issue?

Q6. Has the relationship between researcher and participants been adequately considered?

Q7. Have ethical issues been taken into consideration?

Q8. Was the data analysis sufficiently rigorous?

Q9. Is there a clear statement of findings?

Q10. How valuable is the research?
