# Supplementary material for: Experiences of people taking opioid medication for chronic non-malignant pain: a qualitative evidence synthesis using meta-ethnography
Source: PubMed Central journal article supplement (PMC7044883; doi:10.1136/bmjopen-2019-032988), 2020-02-18
Supplement: bmjopen-2019-032988supp001.pdf [file bmjopen-2019-032988supp001.pdf]

## Appendix 1 The eMERGe meta-ethnography reporting guidance

| Numbered criteria headings with explanatory reporting criteria                                                                                                                                                                                                                                                                                                                         | Page     |
|----------------------------------------------------------------------------------------------------------------------------------------------------------------------------------------------------------------------------------------------------------------------------------------------------------------------------------------------------------------------------------------|----------|
| <b>Phase 1—Selecting meta-ethnography and getting started</b>                                                                                                                                                                                                                                                                                                                          |          |
| <i>Introduction</i>                                                                                                                                                                                                                                                                                                                                                                    |          |
| 1 Rationale and context for the meta-ethnography<br>Describe the gap in research or knowledge to be filled by the meta-ethnography, and the wider context of the meta-ethnography                                                                                                                                                                                                      | 4        |
| 2 Aim(s) of the meta-ethnography<br>Describe the meta-ethnography aim(s)                                                                                                                                                                                                                                                                                                               | 4        |
| 3 Focus of the meta-ethnography<br>Describe the meta-ethnography review question(s) (or objectives)                                                                                                                                                                                                                                                                                    | 4        |
| 4 Rationale for using meta-ethnography<br>Explain why meta-ethnography was considered the most appropriate qualitative synthesis methodology                                                                                                                                                                                                                                           | 4        |
| <b>Phase 2—Deciding what is relevant</b>                                                                                                                                                                                                                                                                                                                                               |          |
| <i>Methods</i>                                                                                                                                                                                                                                                                                                                                                                         |          |
| 5 Search strategy<br>Describe the rationale for the literature search strategy                                                                                                                                                                                                                                                                                                         | 4/5      |
| 6 Search processes<br>Describe how the literature searching was carried out and by whom                                                                                                                                                                                                                                                                                                | 4/5      |
| 7 Selecting primary studies<br>Describe the process of study screening and selection, and who was involved                                                                                                                                                                                                                                                                             | 5        |
| <i>Findings</i>                                                                                                                                                                                                                                                                                                                                                                        |          |
| 8 Outcome of study selection<br>Describe the results of study searches and screening                                                                                                                                                                                                                                                                                                   | 16       |
| <b>Phase 3—Reading included studies</b>                                                                                                                                                                                                                                                                                                                                                |          |
| <i>Methods</i>                                                                                                                                                                                                                                                                                                                                                                         |          |
| 9 Reading and data extraction approach<br>Describe the reading and data extraction method and processes                                                                                                                                                                                                                                                                                | 6        |
| <i>Findings</i>                                                                                                                                                                                                                                                                                                                                                                        |          |
| 10 Presenting characteristics of included studies<br>Describe characteristics of the included studies                                                                                                                                                                                                                                                                                  | Table 1  |
| <b>Phase 4—Determining how studies are related</b>                                                                                                                                                                                                                                                                                                                                     |          |
| <i>Methods</i>                                                                                                                                                                                                                                                                                                                                                                         |          |
| 11 Process for determining how studies are related<br>Describe the methods and processes for determining how the included studies are related: - Which aspects of studies were compared AND- How the studies were compared                                                                                                                                                             | 6        |
| <i>Findings</i>                                                                                                                                                                                                                                                                                                                                                                        |          |
| 12 Outcome of relating studies<br>Describe how studies relate to each other                                                                                                                                                                                                                                                                                                            | 17       |
| <b>Phase 5—Translating studies into one another</b>                                                                                                                                                                                                                                                                                                                                    | 16       |
| <i>Methods</i>                                                                                                                                                                                                                                                                                                                                                                         |          |
| 13 Process of translating studies<br>Describe the methods of translation: - Describe steps taken to preserve the context and meaning of the relationships between concepts within and across studies- Describe how the reciprocal and refutational translations were conducted- Describe how potential alternative interpretations or explanations were considered in the translations | 16       |
| <i>Findings</i>                                                                                                                                                                                                                                                                                                                                                                        |          |
| 14 Outcome of translation<br>Describe the interpretive findings of the translation.                                                                                                                                                                                                                                                                                                    | 17 to 28 |
| <b>Phase 6—Synthesizing translations</b>                                                                                                                                                                                                                                                                                                                                               |          |
| <i>Methods</i>                                                                                                                                                                                                                                                                                                                                                                         |          |
| 15 Synthesis process<br>Describe the methods used to develop overarching concepts (“synthesised translations”)Describe how potential alternative interpretations or explanations were considered in the synthesis                                                                                                                                                                      | 16       |
| <i>Findings</i>                                                                                                                                                                                                                                                                                                                                                                        |          |
| 16 Outcome of synthesis process<br>Describe the new theory, conceptual framework, model, configuration, or interpretation of data developed from the synthesis                                                                                                                                                                                                                         | Figure 1 |
| <b>Phase 7—Expressing the synthesis</b>                                                                                                                                                                                                                                                                                                                                                |          |

|                                                                                                                                                                                                                                                                                                                                                                                              |             |
|----------------------------------------------------------------------------------------------------------------------------------------------------------------------------------------------------------------------------------------------------------------------------------------------------------------------------------------------------------------------------------------------|-------------|
| <i>Discussion</i><br>17 Summary of findings<br>Summarize the main interpretive findings of the translation and synthesis and compare them to existing literature                                                                                                                                                                                                                             | 28 to<br>30 |
| 18 Strengths, limitations, and reflexivity<br>Reflect on and describe the strengths and limitations of the synthesis:<br>- Methodological aspects—for example, describe how the synthesis Findings were influenced by the nature of the included studies and how the meta-ethnography was conducted.<br>- Reflexivity—for example, the impact of the research team on the synthesis findings | 30          |
| 19 Recommendations and conclusions<br>Describe the implications of the Synthesis                                                                                                                                                                                                                                                                                                             | 31          |

Reference: France et al. BMC Medical Research Methodology (2019) 19:25  
<https://doi.org/10.1186/s12874-018-0600-0>
