# Supplementary material for: Experiences of people taking opioid medication for chronic non-malignant pain: a qualitative evidence synthesis using meta-ethnography
Source: PubMed Central journal article supplement (PMC7044883; doi:10.1136/bmjopen-2019-032988), 2020-02-18
Supplement: bmjopen-2019-032988supp003.pdf [file bmjopen-2019-032988supp003.pdf]

## Appendix 3 Critical Appraisal Skills Programme (CASP) Quality appraisal tool scores

| Study            | Q1  | Q2  | Q3  | Q4  | Q5  | Q6  | Q7  | Q8  | Q9  | Q10 | Score |
|------------------|-----|-----|-----|-----|-----|-----|-----|-----|-----|-----|-------|
| Arnaert 2006     | Yes | Yes | Yes | Yes | ?   | No  | Yes | Yes | Yes | Yes | 17/20 |
| Bergman 2013     | Yes | Yes | Yes | Yes | Yes | No  | Yes | ?   | Yes | Yes | 17/20 |
| Blake 2007       | Yes | Yes | Yes | Yes | Yes | ?   | Yes | Yes | Yes | Yes | 19/20 |
| Brooks 2015      | Yes | Yes | Yes | Yes | Yes | No  | Yes | ?   | Yes | Yes | 17/20 |
| Buchbinder 2015  | Yes | Yes | Yes | Yes | Yes | No  | Yes | Yes | Yes | Yes | 18/20 |
| Chang F 2017     | Yes | Yes | Yes | Yes | Yes | No  | ?   | ?   | Yes | Yes | 16/20 |
| Chang Y-P 2011   | Yes | Yes | Yes | Yes | Yes | No  | Yes | ?   | ?   | Yes | 16/20 |
| Coyne 2015       | Yes | Yes | Yes | Yes | Yes | No  | Yes | ?   | Yes | Yes | 17/20 |
| Esquibel 2014    | Yes | Yes | Yes | Yes | Yes | Yes | Yes | Yes | Yes | Yes | 20/20 |
| Frank 2016       | Yes | Yes | Yes | Yes | Yes | Yes | Yes | Yes | Yes | Yes | 20/20 |
| Green 2017       | Yes | Yes | Yes | Yes | Yes | No  | Yes | Yes | Yes | Yes | 18/20 |
| Hooten 2011      | Yes | Yes | Yes | Yes | Yes | No  | Yes | Yes | Yes | Yes | 18/20 |
| Krebs 2014       | Yes | Yes | Yes | Yes | Yes | ?   | Yes | Yes | Yes | Yes | 19/20 |
| Matthias 2014    | Yes | Yes | Yes | Yes | Yes | No  | Yes | Yes | Yes | Yes | 18/20 |
| McCrorie 2015    | Yes | Yes | ?   | Yes | Yes | No  | Yes | Yes | Yes | Yes | 17/20 |
| Mueller 2017     | Yes | Yes | Yes | Yes | ?   | No  | Yes | Yes | ?   | Yes | 16/20 |
| Paterson 2016    | Yes | Yes | Yes | Yes | Yes | ?   | ?   | Yes | Yes | Yes | 18/20 |
| Penney 2017      | Yes | Yes | ?   | ?   | ?   | ?   | Yes | ?   | ?   | ?   | 13/20 |
| Rieb 2016        | Yes | Yes | Yes | Yes | Yes | ?   | Yes | ?   | Yes | Yes | 18/20 |
| Simmonds 2015    | Yes | Yes | ?   | Yes | Yes | ?   | Yes | Yes | ?   | ?   | 16/20 |
| St Marie 2016    | Yes | Yes | Yes | Yes | Yes | ?   | Yes | Yes | Yes | Yes | 19/20 |
| Vallerand 1 2009 | Yes | Yes | Yes | Yes | Yes | No  | No  | Yes | ?   | Yes | 15/20 |
| Vallerand 2 2010 | Yes | Yes | Yes | ?   | Yes | No  | No  | Yes | ?   | ?   | 13/20 |
| Wallace 2014     | Yes | Yes | Yes | Yes | Yes | No  | Yes | ?   | ?   | Yes | 16/20 |
| Warms 2005       | Yes | Yes | Yes | Yes | Yes | No  | No  | Yes | Yes | Yes | 16/20 |
| Zgierska 2016    | Yes | Yes | Yes | Yes | Yes | No  | Yes | Yes | Yes | Yes | 18/20 |
| Zheng 2013       | Yes | Yes | Yes | Yes | Yes | No  | ?   | Yes | Yes | Yes | 17/20 |
| Al Achkar 2017   | Yes | Yes | Yes | Yes | Yes | No  | Yes | Yes | Yes | Yes | 18/20 |
| Matthias 2017    | Yes | Yes | Yes | Yes | Yes | No  | Yes | Yes | Yes | Yes | 18/20 |
| Matthias 2018    | Yes | Yes | Yes | Yes | Yes | ?   | Yes | Yes | Yes | Yes | 19/20 |
| Smith 2018       | Yes | Yes | Yes | Yes | Yes | Yes | Yes | Yes | Yes | Yes | 20/20 |

**Legend 1 Critical Appraisal Skills Programme (CASP) questions scoring: Yes =2 ? (Can't Tell) = 1 No = 0**

Q1. Was there a clear statement of the aims of the research?

Q2. Is a qualitative methodology appropriate?

Q3. Was the research design appropriate to the aims of the research?

Q4. Was the recruitment strategy appropriate to the aims of the research?

Q5. Was the data collected in a way that addressed the research issue?

Q6. Has the relationship between researcher and participants been adequately considered?

Q7. Have ethical issues been taken into consideration?

Q8. Was the data analysis sufficiently rigorous?

Q9. Is there a clear statement of findings?

Q10. How valuable is the research?
